# Supplementary material
Source: PubMed Central journal article supplement (PMC2836128)

**Enantioselective Conjugate Silyl Additions to Cyclic and Acyclic  
Unsaturated Carbonyls Catalyzed by Cu Complexes of  
Chiral *N*-Heterocyclic Carbenes**

Kang-sang Lee and Amir H. Hoveyda\*

*Department of Chemistry, Merkert Chemistry Center,  
Boston College, Chestnut Hill, Massachusetts 02467*

**SUPPORTING INFORMATION, PART II**

**NMR Spectra**

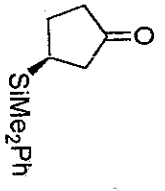

Entry 1  
Table 2

KL-VIIZI-116

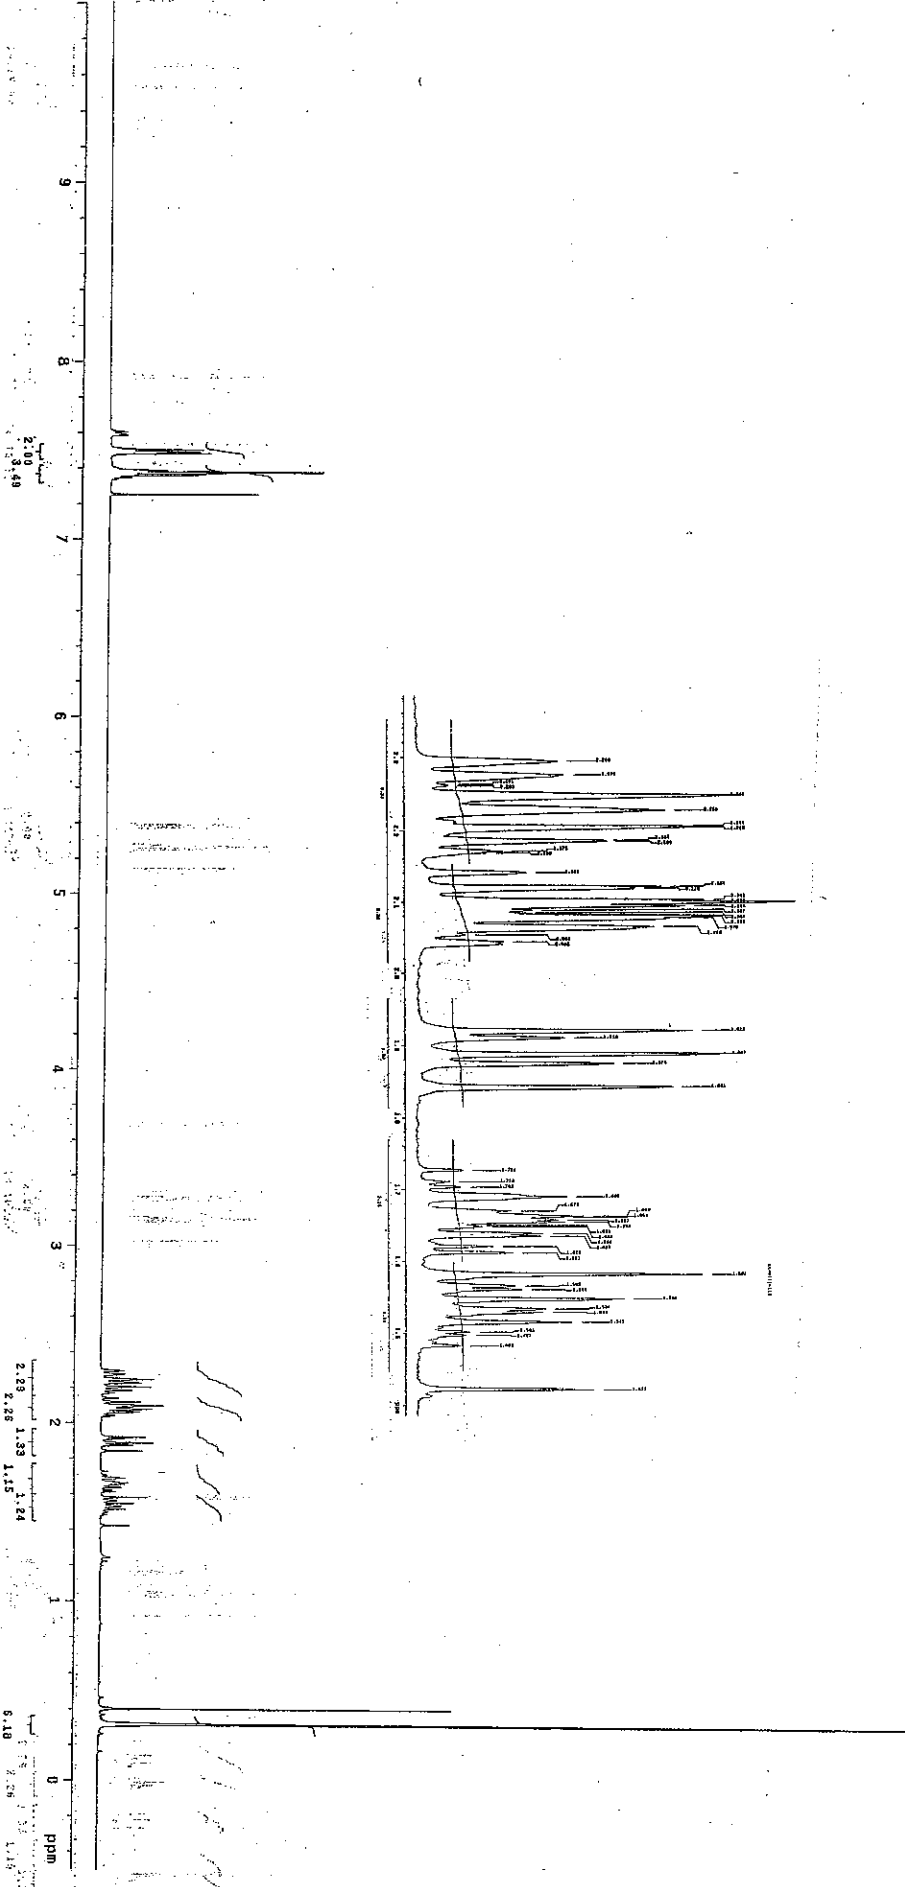

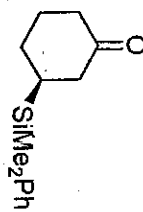

Entry 2  
Table 2

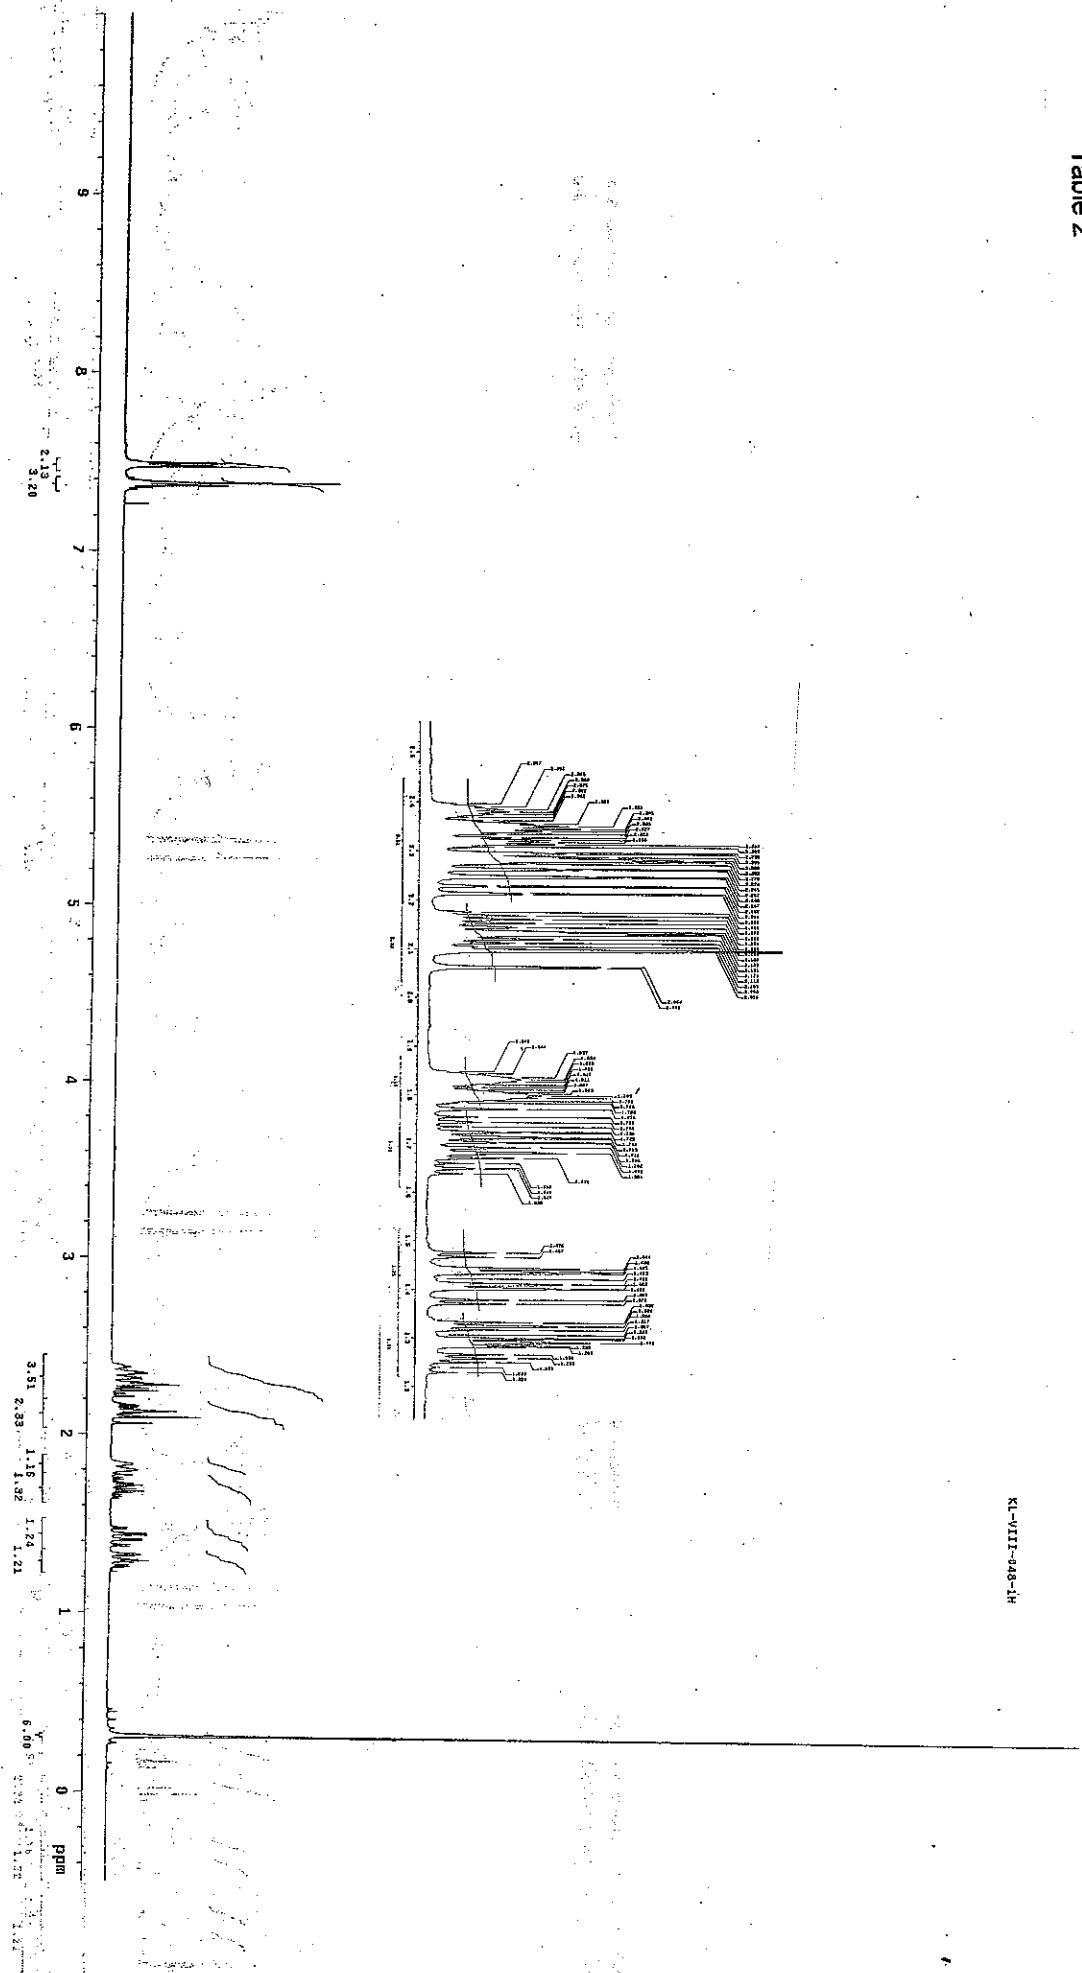

KL-VIII-948-1H

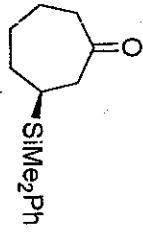

Entry 3  
Table 2

KL-VII-117

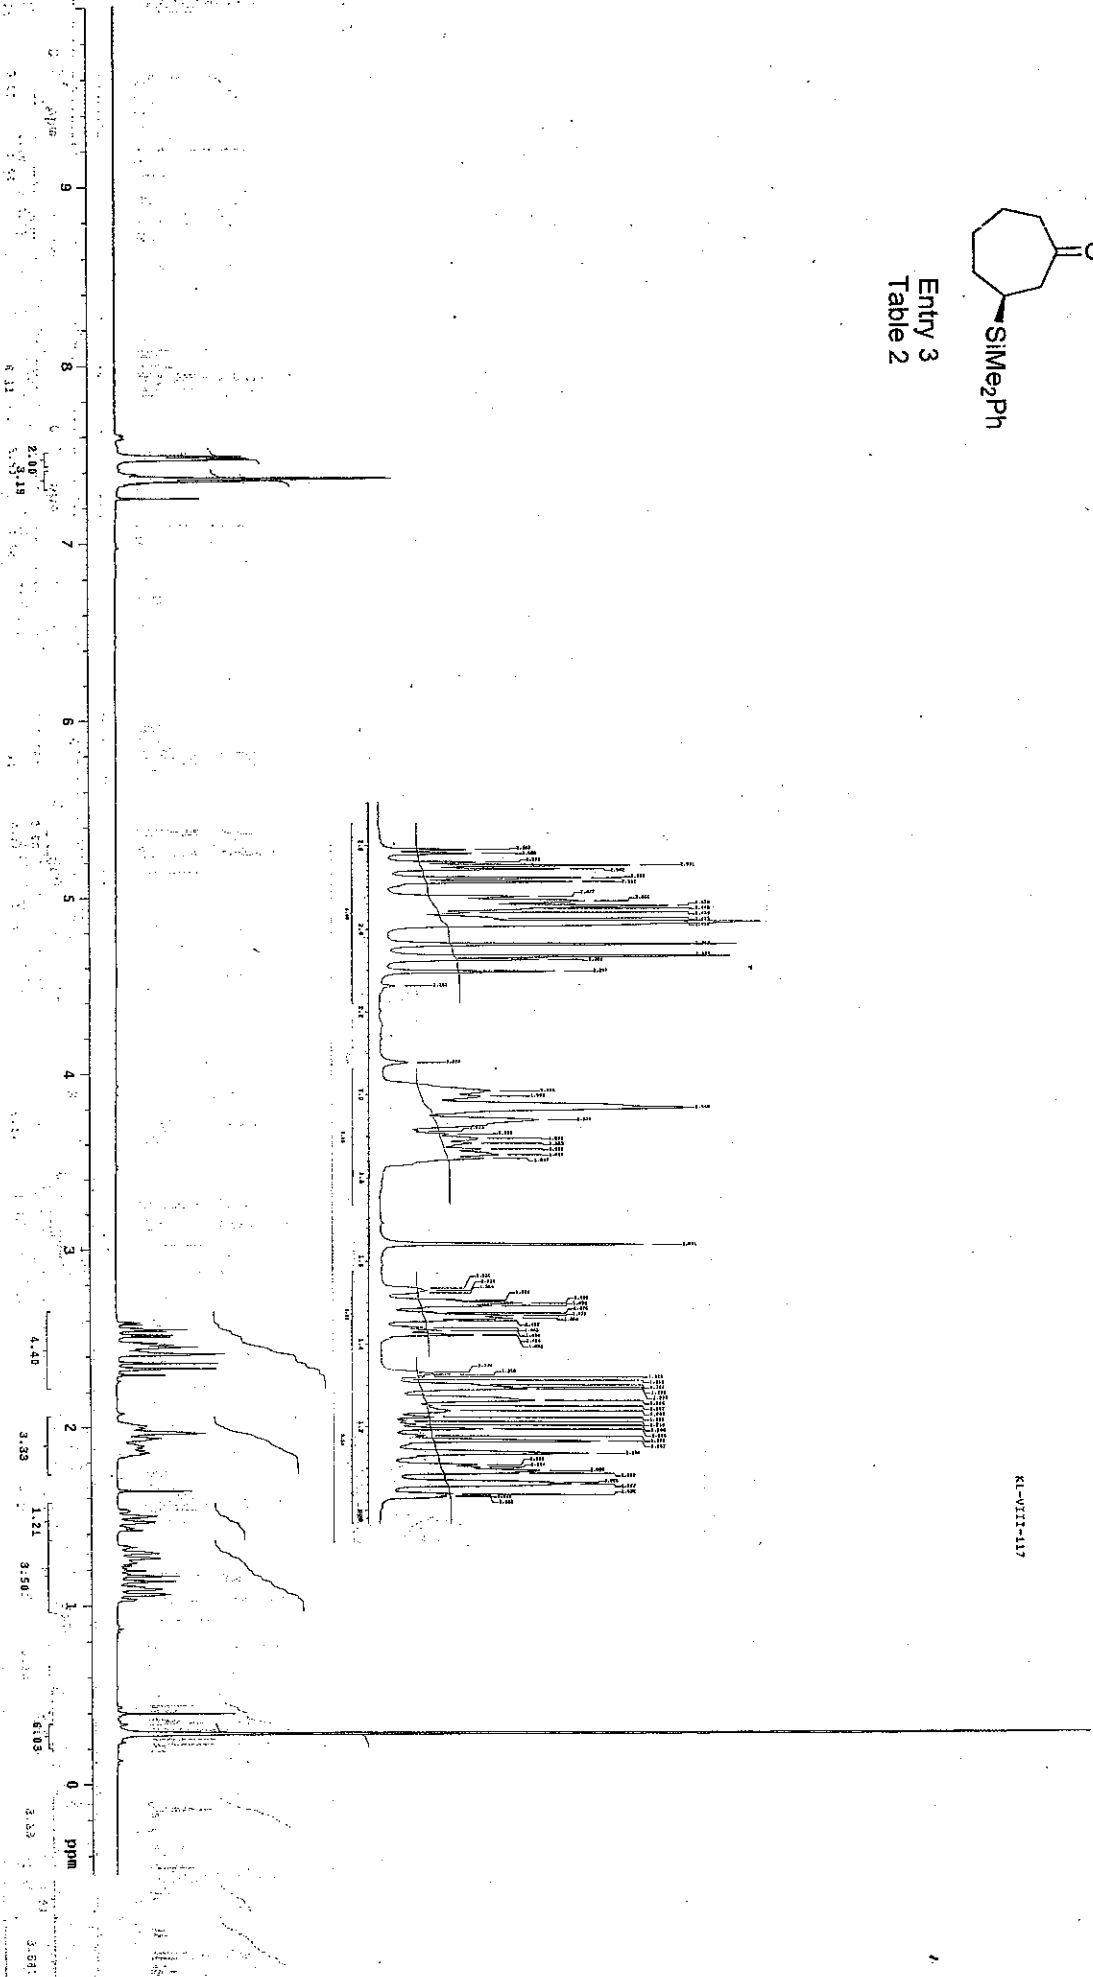

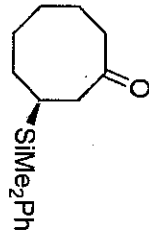

Entry 4  
Table 2

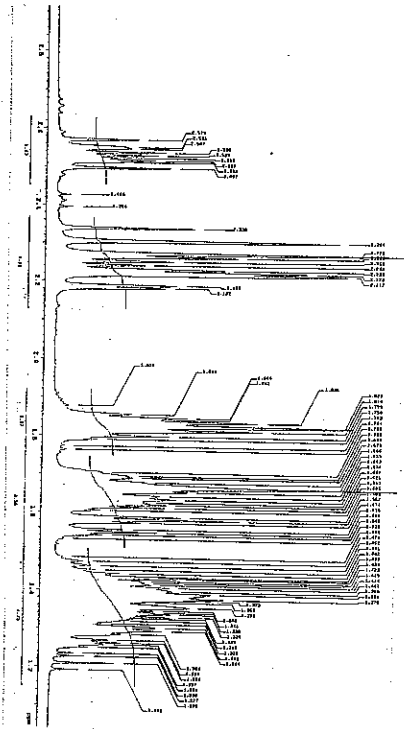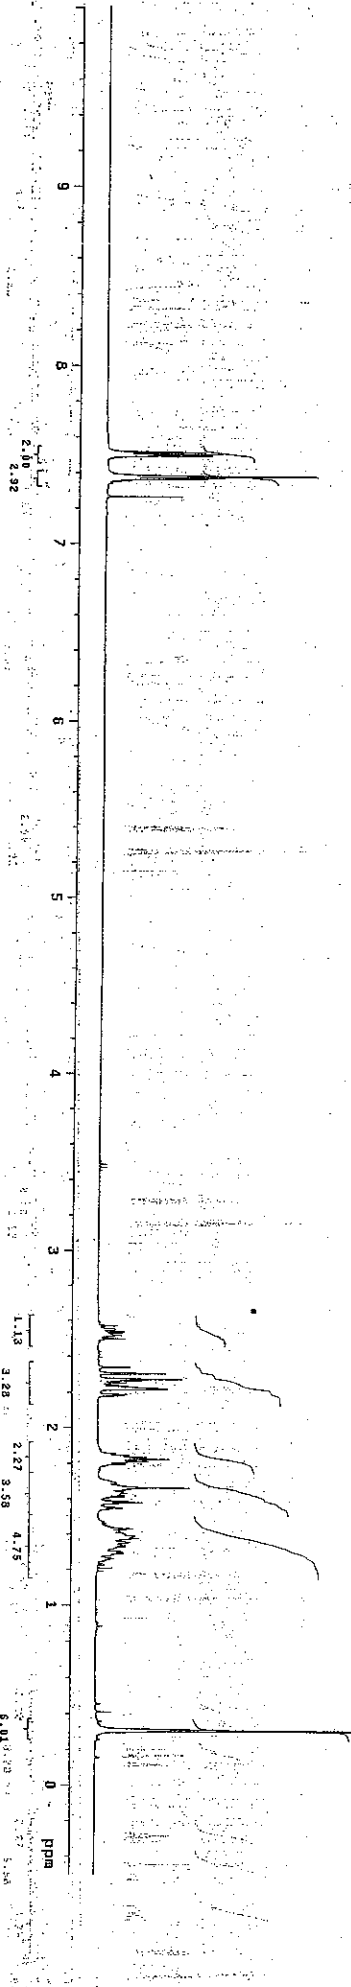

KI-VIII-118

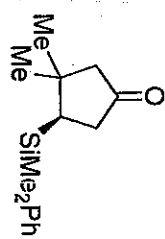

Entry 5  
Table 2

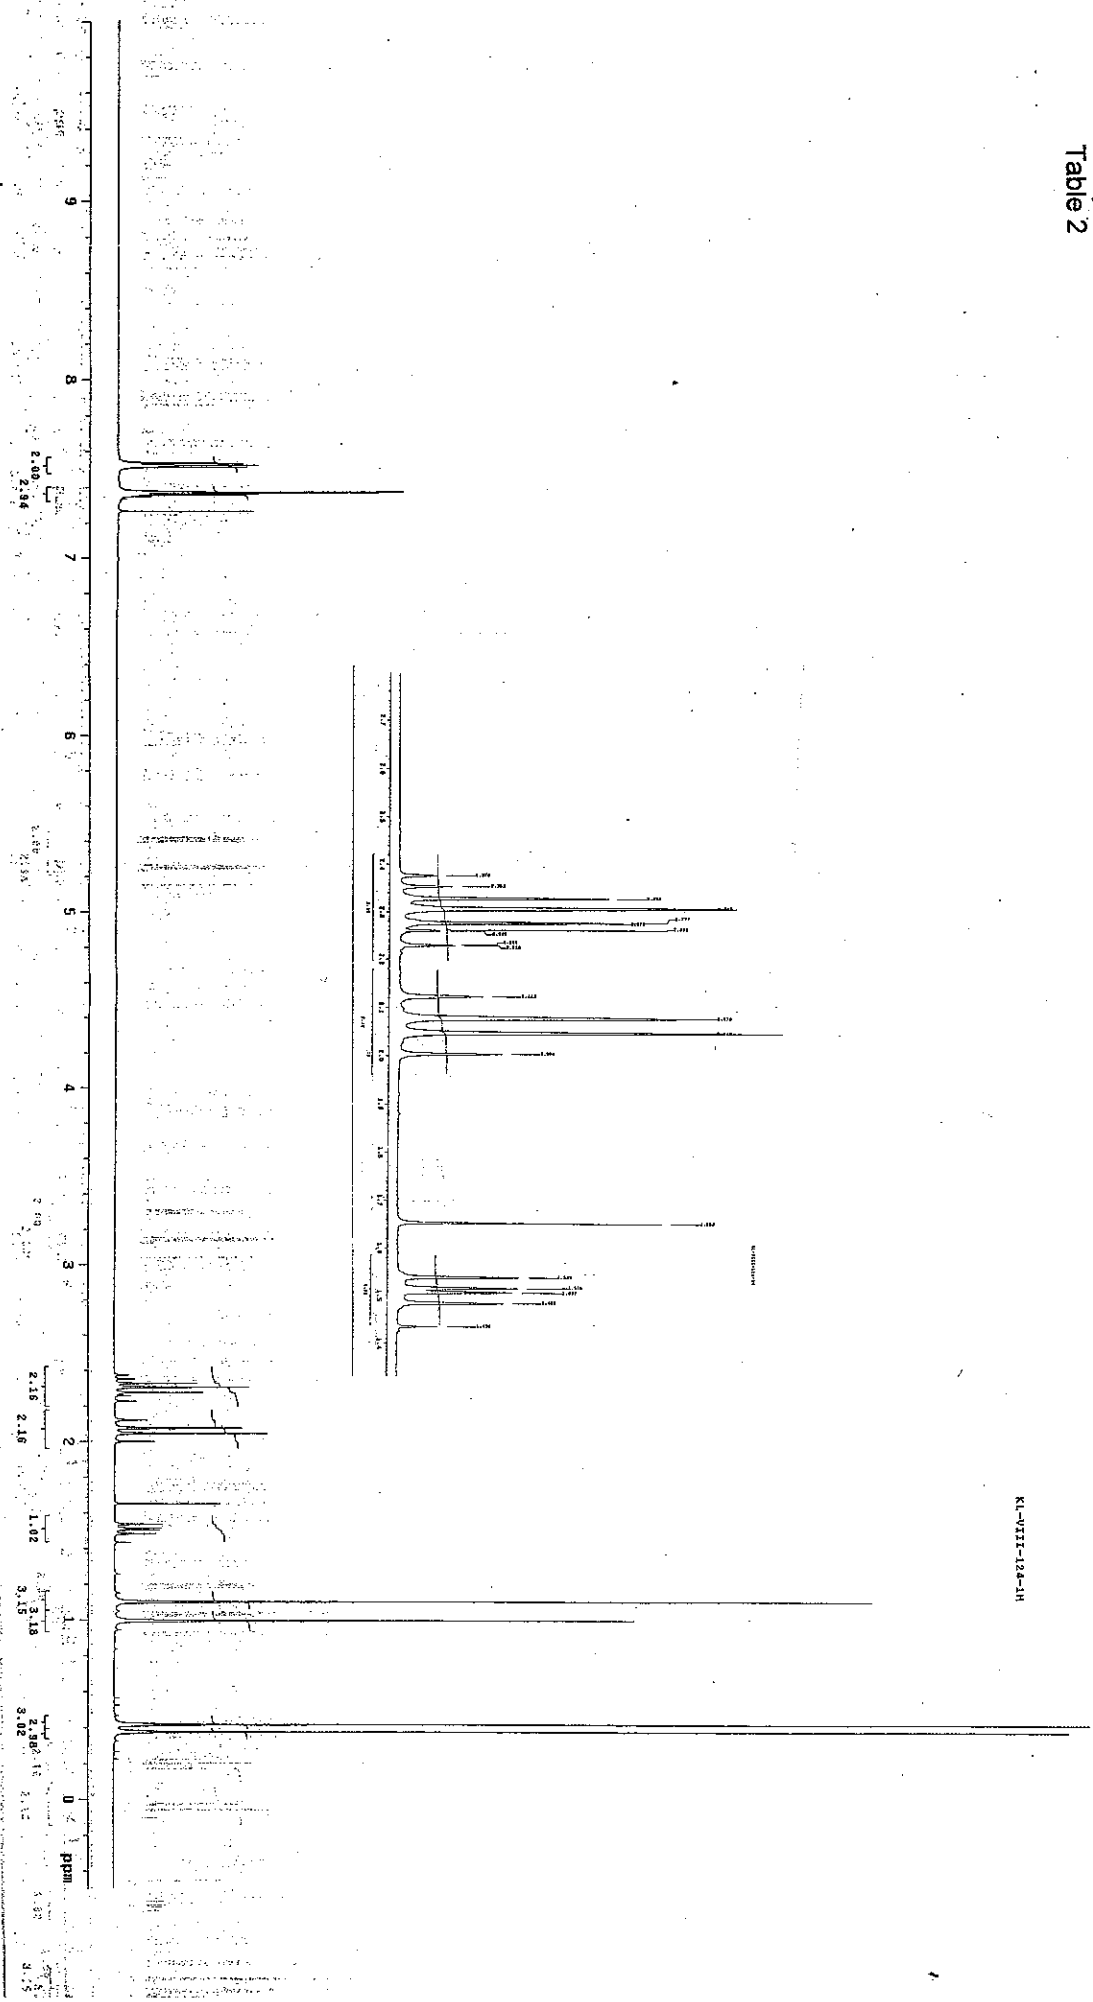

KL-VII-124-1H



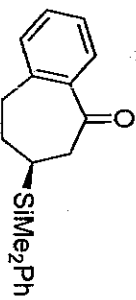

Entry 7  
Table 2

KL-VIII-139

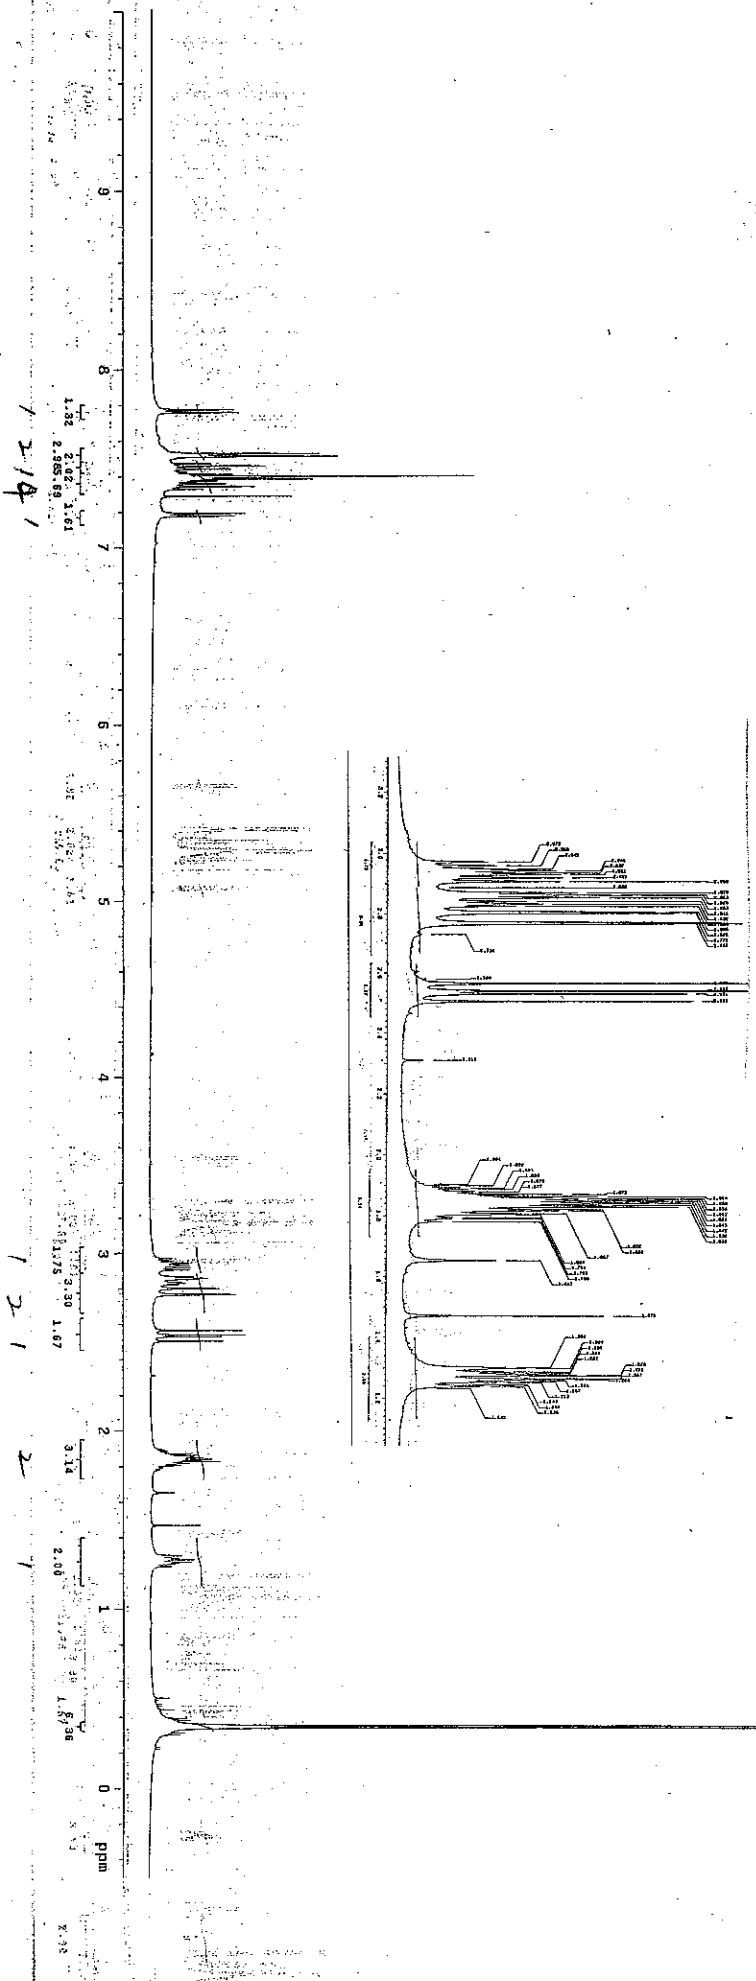



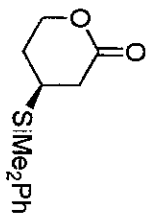

Entry 8  
Table 2

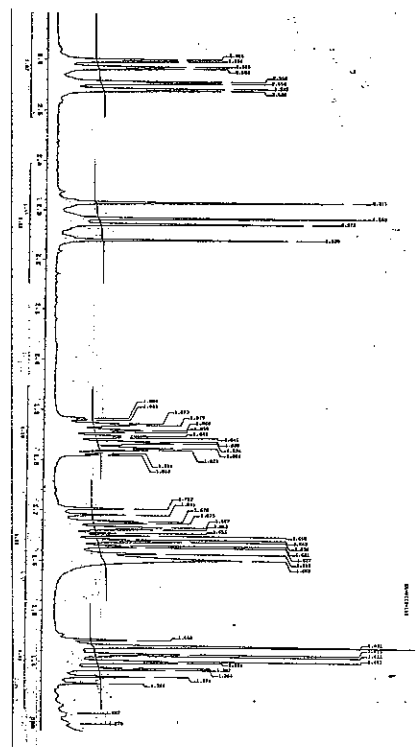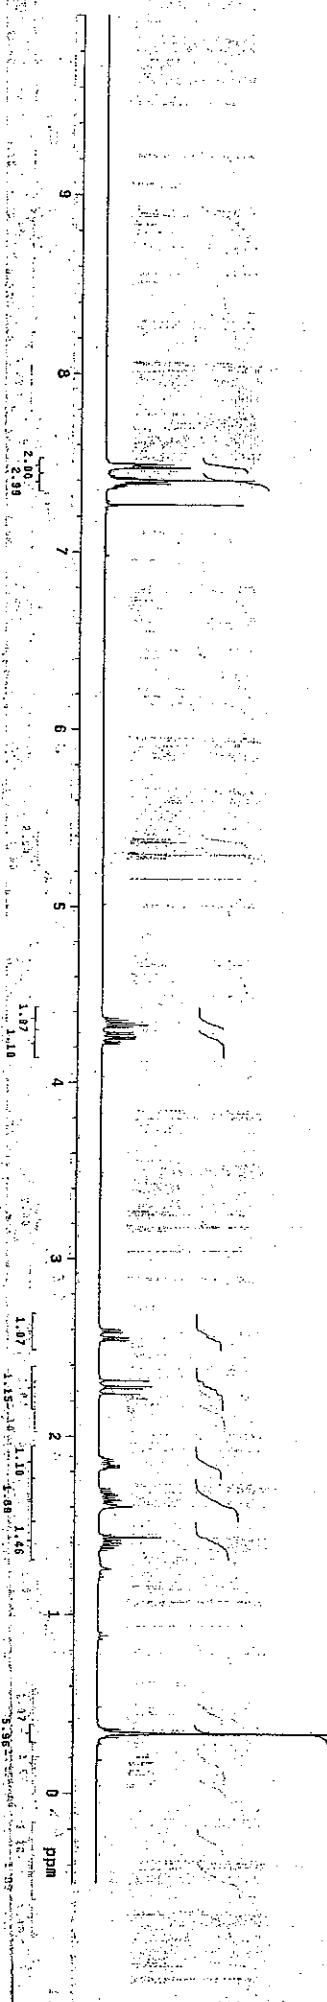

KJ-VIII-119

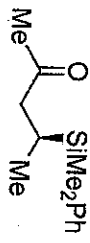

Entry 1  
Table 3

Sample: KL-1X-0/3-1H  
 File: 8X  
 Pulse sequence: rzpu1  
 Solvent: cdcl3  
 Omega: 29.9867 301.1 K  
 Omega: 29.9867 301.1 K  
 VNAME: 4D0 "vnmr13"  
 Relax: delay 1.000 sec  
 Acq: time 2.000 sec  
 Width 4000.4 Hz  
 ZG: PrePulsions 99.7632000 MHz  
 DATA PROCESSING  
 Resol: enhancement -0.0 Hz  
 F1 size 65536  
 Total time 9 min, 21 sec

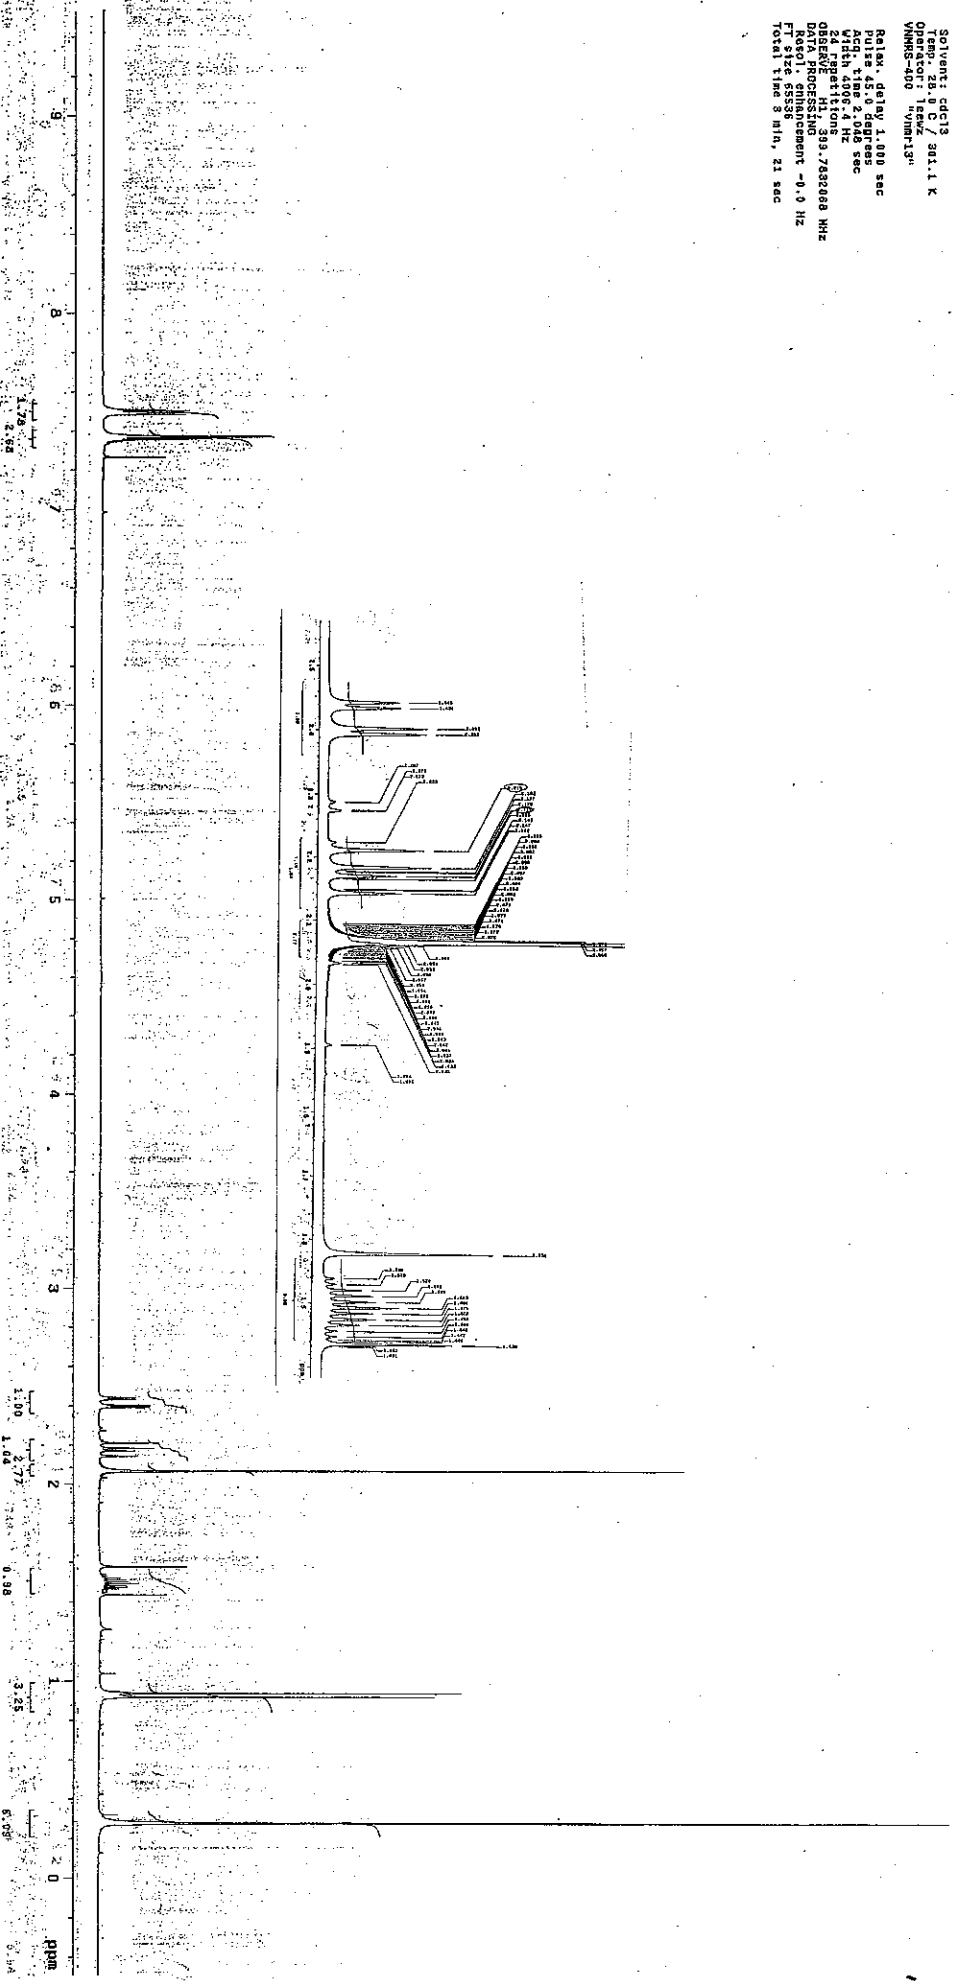





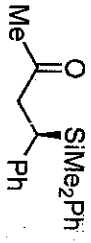

Entry 4  
Table 3

SAMPLE: KI-IX-051-1H  
Filter: exp  
Pulse Sequence: sfgpu1  
Solvent: CDCl<sub>3</sub>  
Operator: lewz  
VHRS-400 "VHMR13"  
Date: 02/07/1999  
Acq. time: 2.048 sec  
V/ich: 4000.4 Hz  
OBSERVE: H1309.7632141 MHz  
F2: 100.626126 MHz  
F3: 101.325126 MHz  
Total time: 8 min, 21 sec

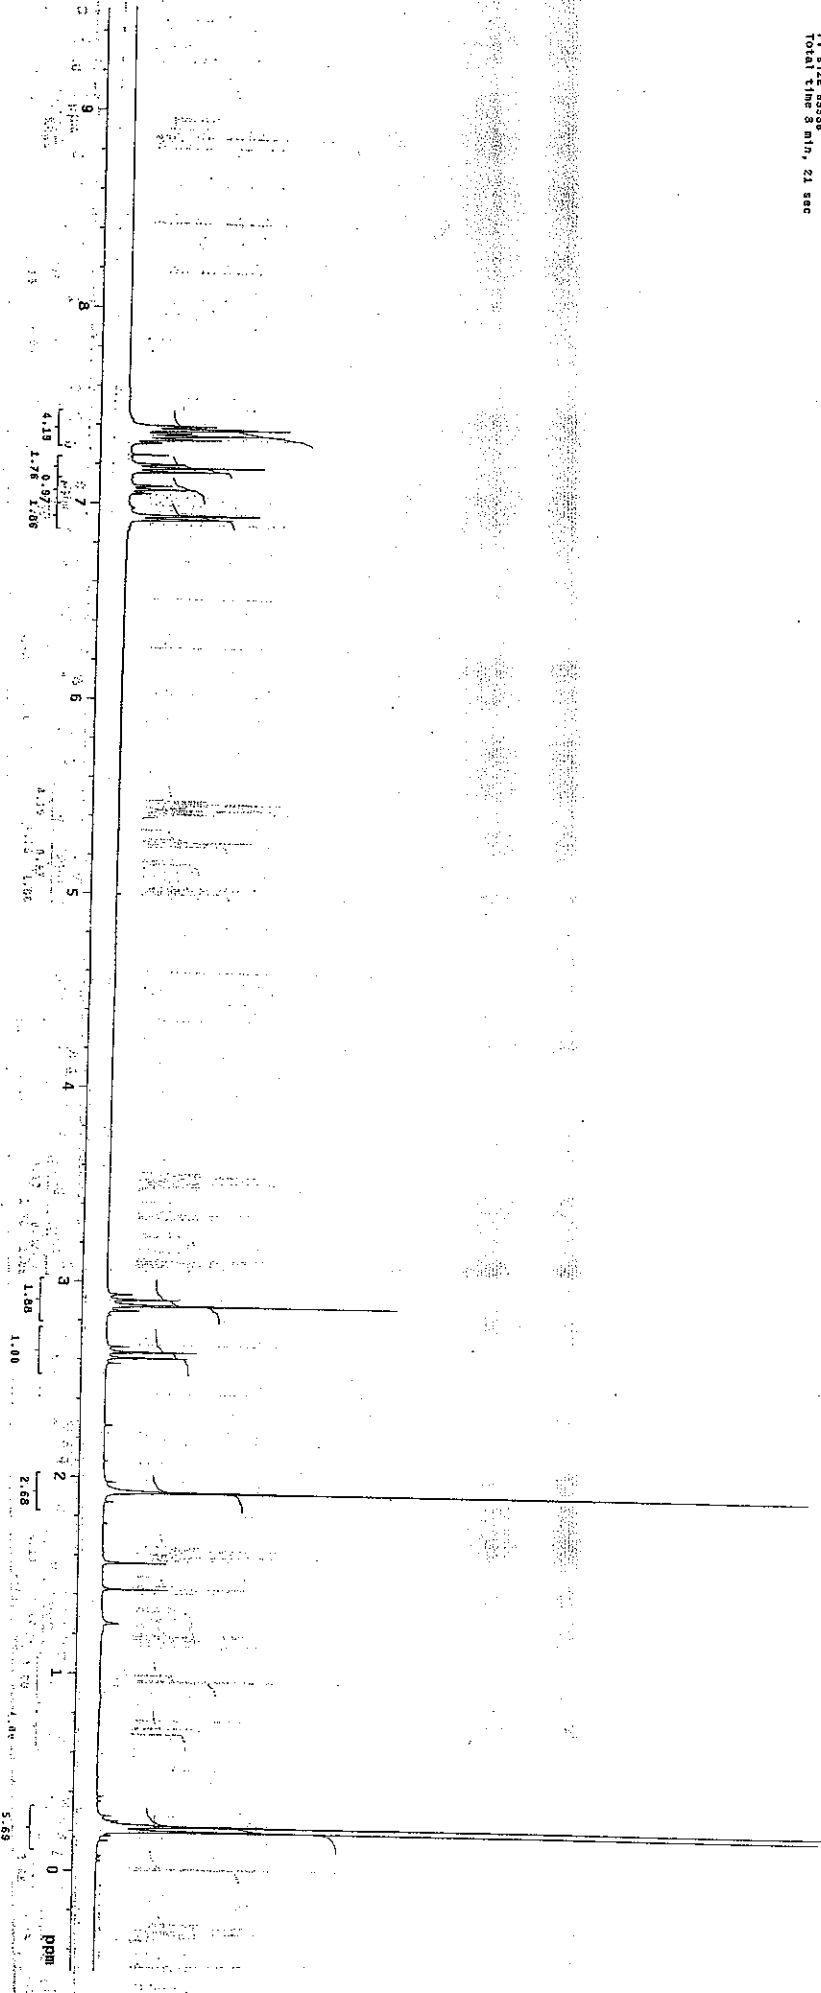

Sample: KL-IX-098-1H  
 F1: 1: exp  
 Pulse Sequence: s2pu1  
 Solvent: cdcl3  
 Ambient Temperature  
 VHSR-400 100mmr130  
 Relax: delay 1.000 sec  
 Pulse: 45.0 degrees  
 Width: 4000.4 Hz  
 16 F2: 100.626199 MHz  
 002: 100.626199 MHz  
 Resol: enhancement -0.0 Hz  
 FT size: 65536  
 Total time: 3 min, 21 sec

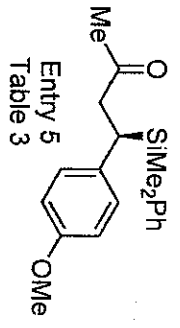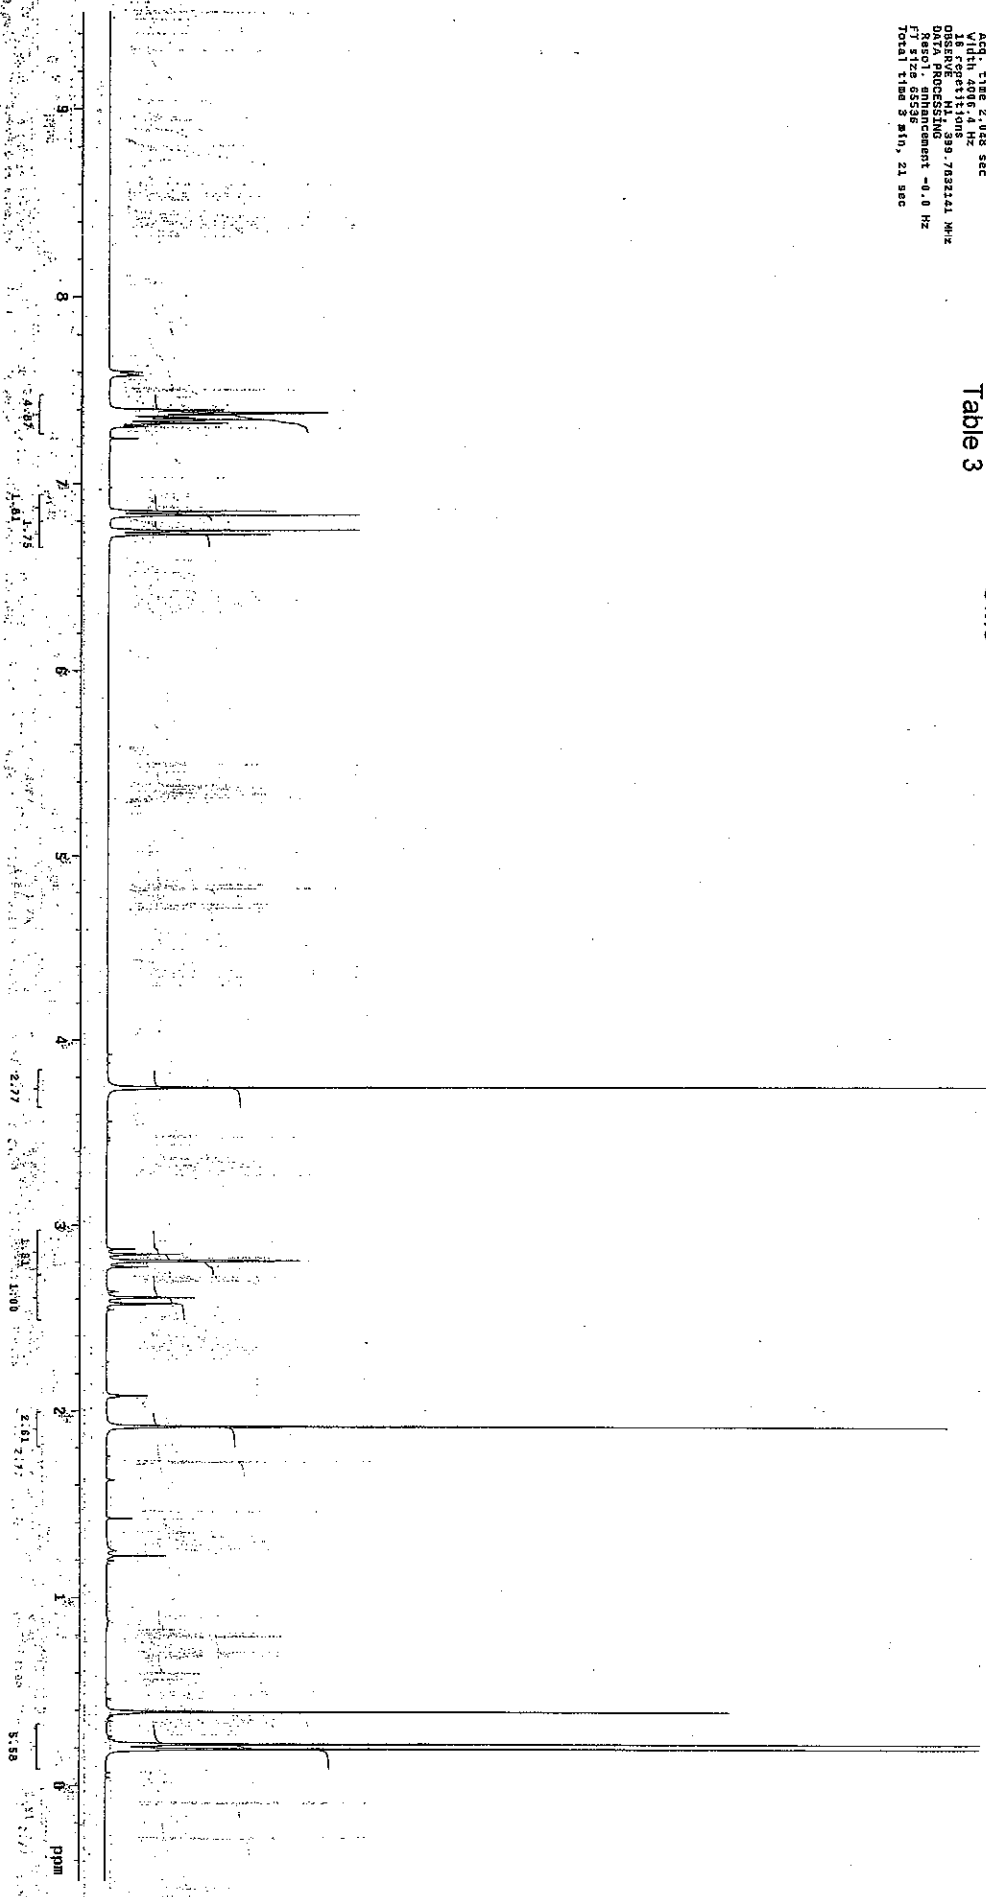

Sample: Kl-IX-100-1H  
 File: exp  
 Pulse Sequence: zgpg1  
 Solvent: CDCl3  
 Ambient Temperature  
 Operator: lewz  
 VNAME: 400 VNMJ13"

Relax. delay 1.000 sec  
 Pulse 45.0 degree  
 AQR1 time 2.000 sec  
 AQR2 time 2.000 sec  
 AQR3 time 2.000 sec  
 20 repetitions  
 OBSERVE: H1 399.7620047 MHz  
 DATA PROCESSING  
 Reference: solvent -0.0 Hz  
 FT size 6536  
 Total time 3 min, 21 sec

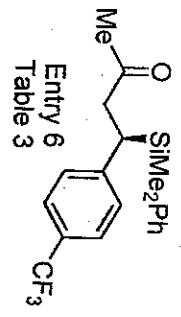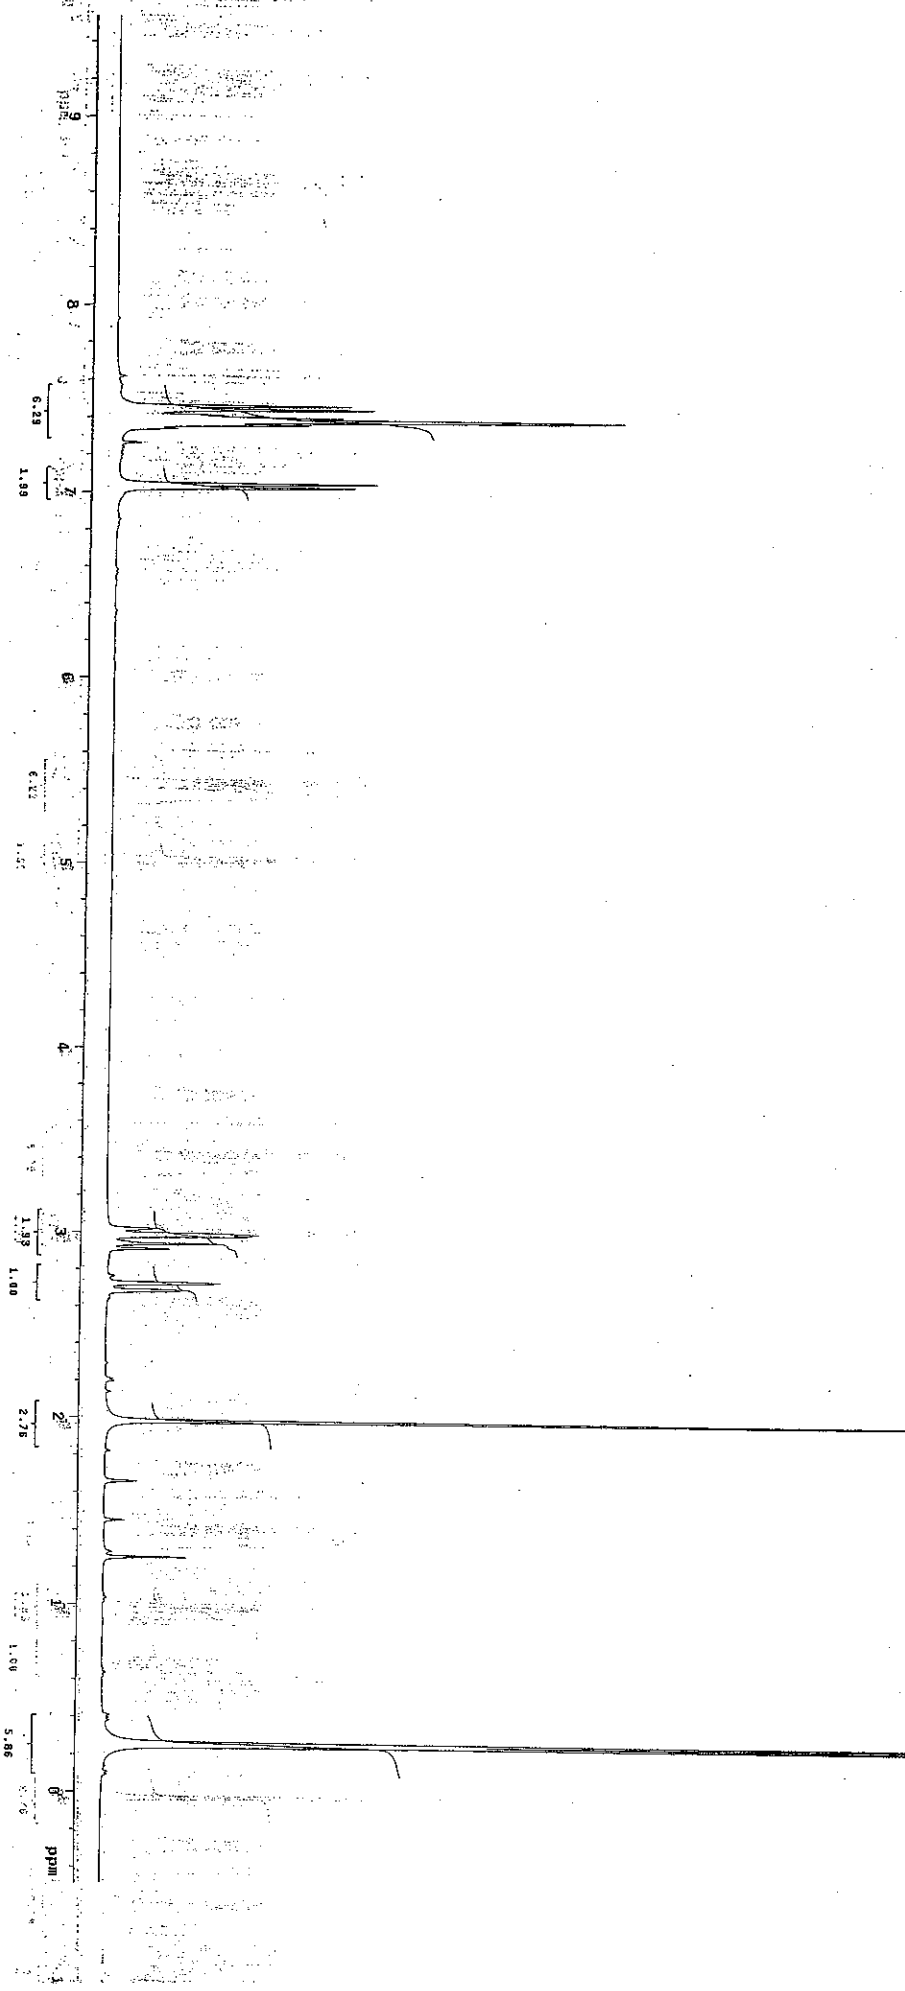

Sample: KI-IX-089-1H  
 Filter: exp  
 Pulse Sequence: zgpg30  
 Solvent: cdcl3  
 Solvent Temperature: 300.2 K  
 Operator: jsm  
 Name: 089-1H  
 Relax. delay: 1.000 sec  
 Pulse: 45.0 degrees  
 A1: 1.000 sec  
 A2: 1.000 sec  
 A3: 1.000 sec  
 D1: 2.000 sec  
 D2: 2.000 sec  
 D3: 2.000 sec  
 D4: 2.000 sec  
 D5: 2.000 sec  
 D6: 2.000 sec  
 D7: 2.000 sec  
 D8: 2.000 sec  
 D9: 2.000 sec  
 D10: 2.000 sec  
 D11: 2.000 sec  
 D12: 2.000 sec  
 D13: 2.000 sec  
 D14: 2.000 sec  
 D15: 2.000 sec  
 D16: 2.000 sec  
 D17: 2.000 sec  
 D18: 2.000 sec  
 D19: 2.000 sec  
 D20: 2.000 sec  
 D21: 2.000 sec  
 D22: 2.000 sec  
 D23: 2.000 sec  
 D24: 2.000 sec  
 D25: 2.000 sec  
 D26: 2.000 sec  
 D27: 2.000 sec  
 D28: 2.000 sec  
 D29: 2.000 sec  
 D30: 2.000 sec  
 D31: 2.000 sec  
 D32: 2.000 sec  
 D33: 2.000 sec  
 D34: 2.000 sec  
 D35: 2.000 sec  
 D36: 2.000 sec  
 D37: 2.000 sec  
 D38: 2.000 sec  
 D39: 2.000 sec  
 D40: 2.000 sec  
 D41: 2.000 sec  
 D42: 2.000 sec  
 D43: 2.000 sec  
 D44: 2.000 sec  
 D45: 2.000 sec  
 D46: 2.000 sec  
 D47: 2.000 sec  
 D48: 2.000 sec  
 D49: 2.000 sec  
 D50: 2.000 sec  
 D51: 2.000 sec  
 D52: 2.000 sec  
 D53: 2.000 sec  
 D54: 2.000 sec  
 D55: 2.000 sec  
 D56: 2.000 sec  
 D57: 2.000 sec  
 D58: 2.000 sec  
 D59: 2.000 sec  
 D60: 2.000 sec  
 D61: 2.000 sec  
 D62: 2.000 sec  
 D63: 2.000 sec  
 D64: 2.000 sec  
 D65: 2.000 sec  
 D66: 2.000 sec  
 D67: 2.000 sec  
 D68: 2.000 sec  
 D69: 2.000 sec  
 D70: 2.000 sec  
 D71: 2.000 sec  
 D72: 2.000 sec  
 D73: 2.000 sec  
 D74: 2.000 sec  
 D75: 2.000 sec  
 D76: 2.000 sec  
 D77: 2.000 sec  
 D78: 2.000 sec  
 D79: 2.000 sec  
 D80: 2.000 sec  
 D81: 2.000 sec  
 D82: 2.000 sec  
 D83: 2.000 sec  
 D84: 2.000 sec  
 D85: 2.000 sec  
 D86: 2.000 sec  
 D87: 2.000 sec  
 D88: 2.000 sec  
 D89: 2.000 sec  
 D90: 2.000 sec  
 D91: 2.000 sec  
 D92: 2.000 sec  
 D93: 2.000 sec  
 D94: 2.000 sec  
 D95: 2.000 sec  
 D96: 2.000 sec  
 D97: 2.000 sec  
 D98: 2.000 sec  
 D99: 2.000 sec  
 D100: 2.000 sec  
 Total time: 21 min, 21 sec

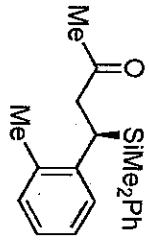

Entry 7  
Table 3

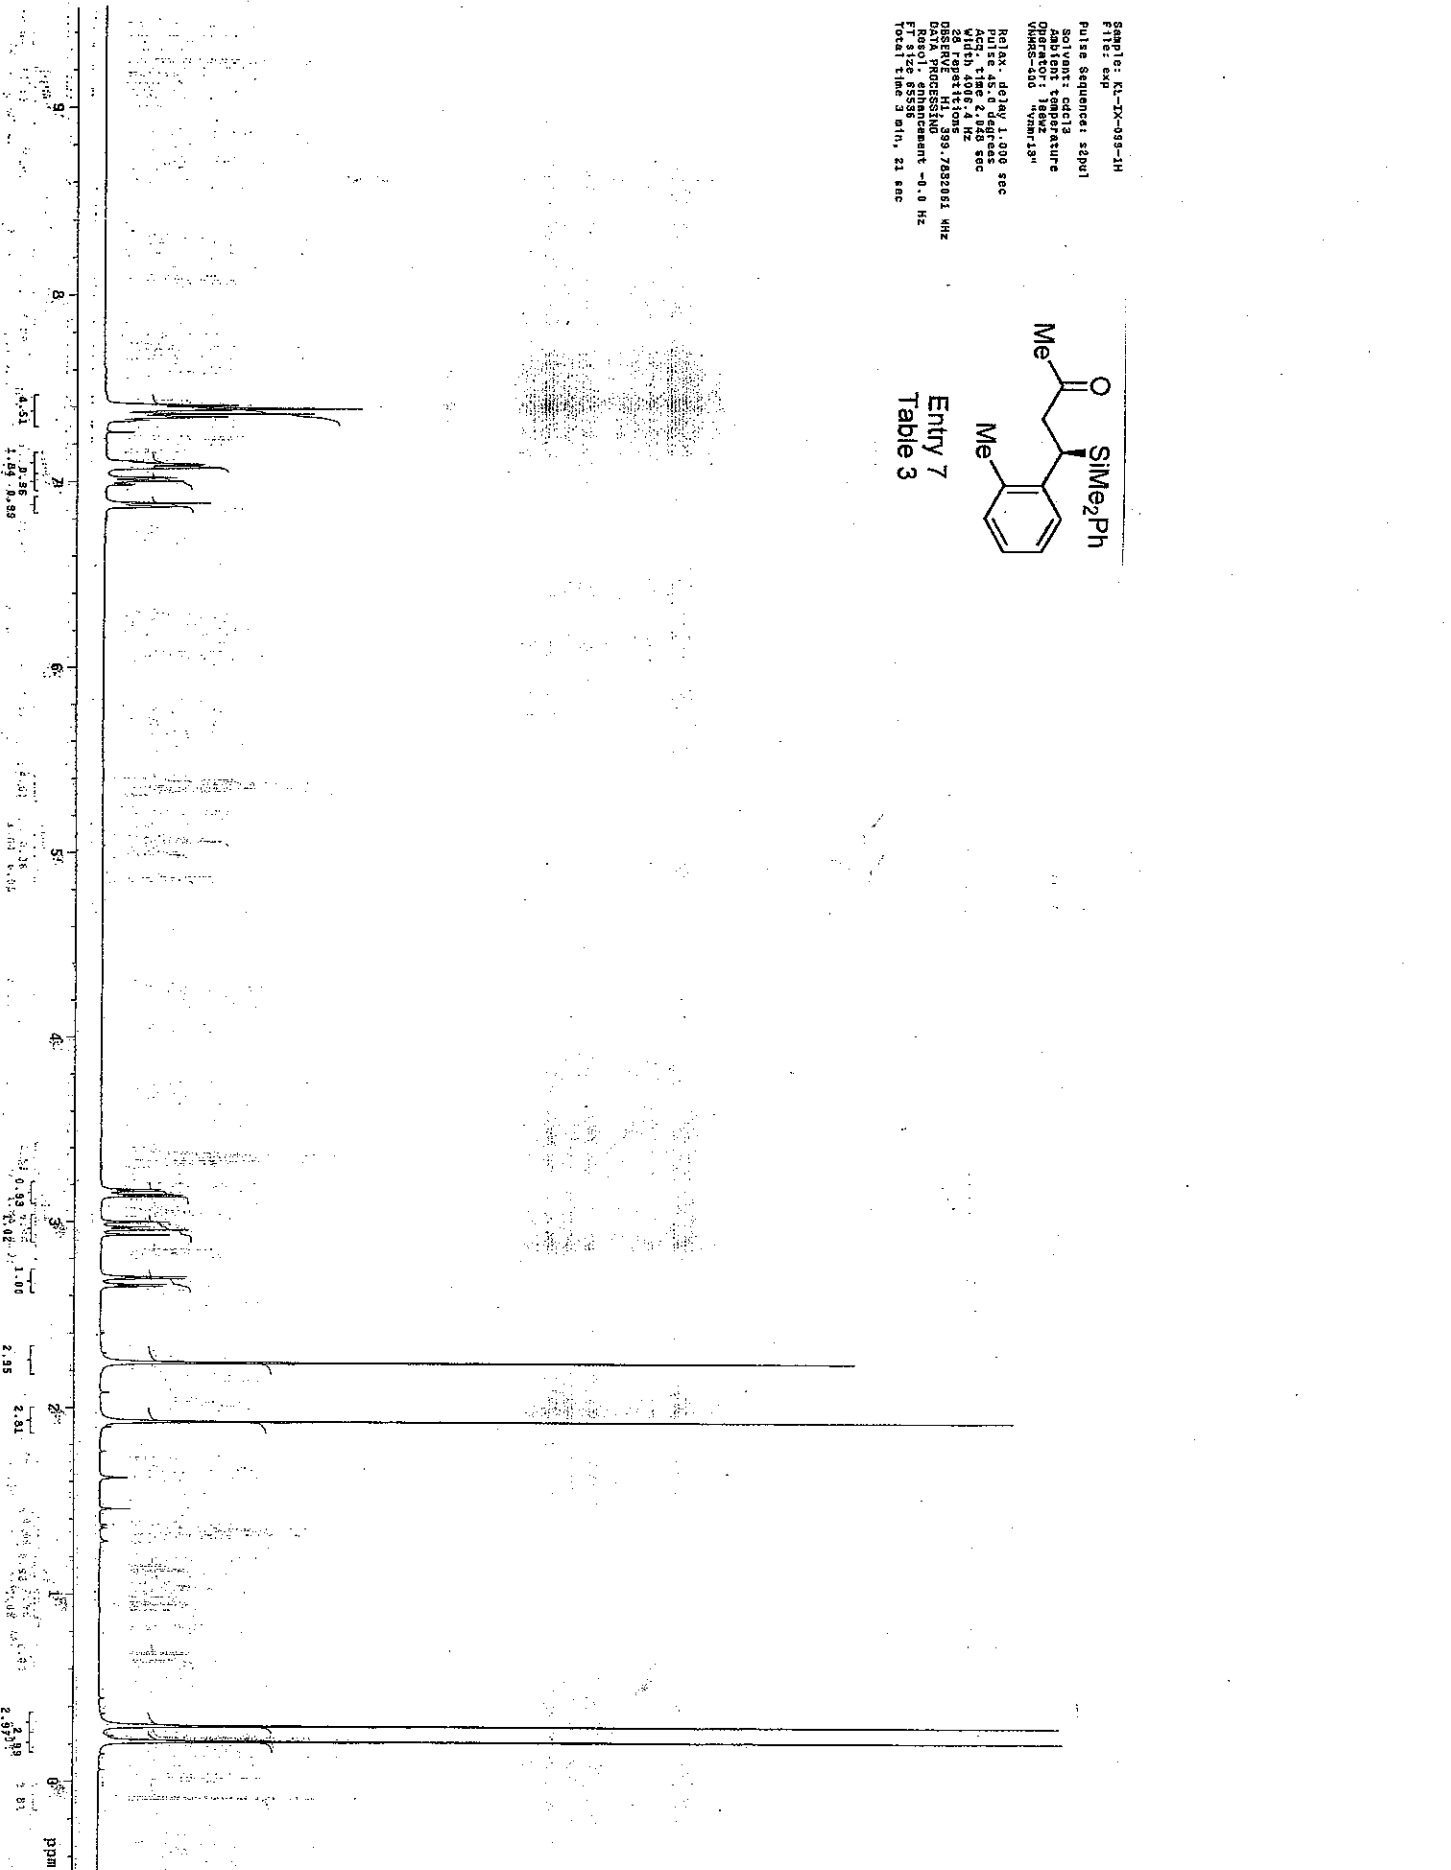



Sample: KL-IX-044-c  
File: exp  
Pulse Sequence: szpu1  
Solvent: cdcl3  
Temp: 28.0 C / 301.1 K  
Operator: leewz  
VNMRS-400 "vnmr13"  
Relax. delay 1.000 sec  
Pulse 45.0 degrees  
Acq. time 2.048 sec  
Width 4006.4 Hz  
28 repetitions  
OBSERVE H1, 399.7832141 MHz  
DATA PROCESSING  
Resol: enhancement -0.0 Hz  
FT size 85358  
Total time 3 min, 21 sec

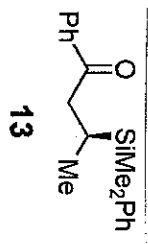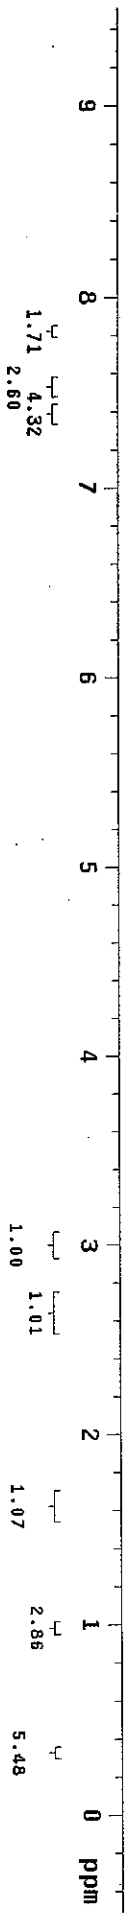

Sample: KL-IX-089-1H  
 File: 0XP  
 Pulse sequence: zgpg30  
 Solvent: cdcl3  
 Ambient temperature  
 Operator: rkoz  
 VNAME: 089 1HMR130  
 Relax: delay 1.000 sec  
 Pulse 45.0 degrees  
 Width 4002.000 sec  
 24 repetitions  
 OBSERVE: H1, 399.7832141 MHz  
 Presol: enhancement -0.0 Hz  
 FT size 65528  
 Total time 3 (min), 21 sec

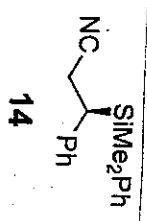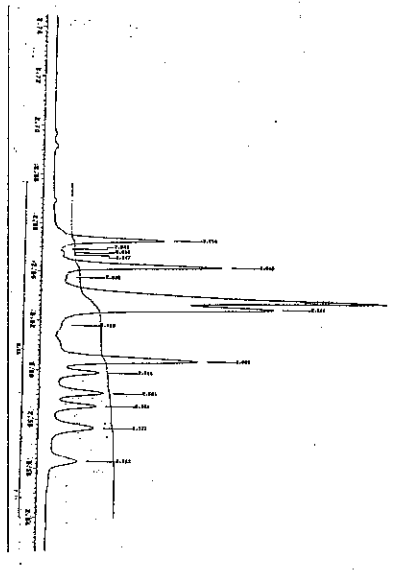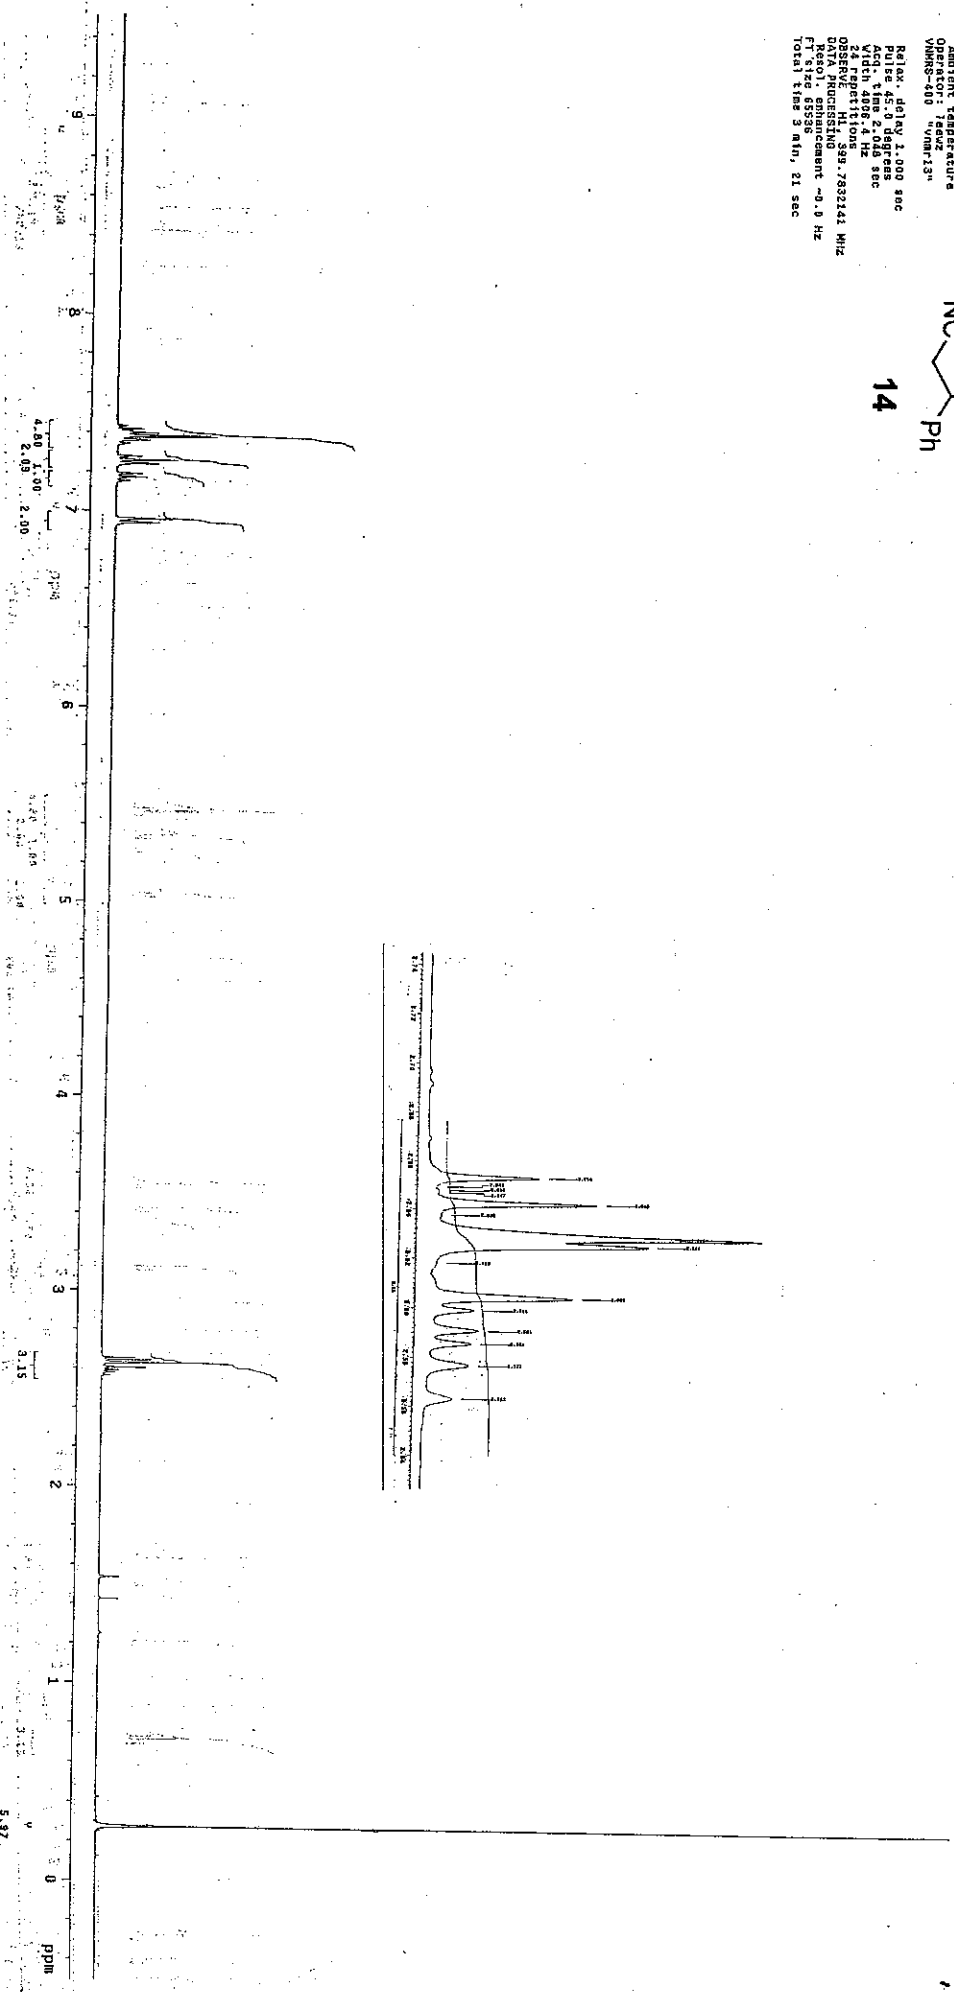

Sample: KL-15-189-1H  
 File: 0XP  
 Pulse sequence: zgpg30  
 Solvent: cdcl3  
 Temp: 25.0 C / 298.1 K  
 Operator: 100WZ  
 VNAME: 400 Vnm413  
 Relax. delay: 1.000 sec  
 Pulse: 45.0 Degrees  
 Acq. time: 2.048 sec  
 16 Repetitions  
 OBSERVE: H1 N 399.7638073 MHz  
 P1: 12.0000000 sec  
 P2: 0.0000000 sec  
 P3: 0.0000000 sec  
 P4: 0.0000000 sec  
 P5: 0.0000000 sec  
 P6: 0.0000000 sec  
 P7: 0.0000000 sec  
 P8: 0.0000000 sec  
 P9: 0.0000000 sec  
 P10: 0.0000000 sec  
 P11: 0.0000000 sec  
 P12: 0.0000000 sec  
 P13: 0.0000000 sec  
 P14: 0.0000000 sec  
 P15: 0.0000000 sec  
 P16: 0.0000000 sec  
 P17: 0.0000000 sec  
 P18: 0.0000000 sec  
 P19: 0.0000000 sec  
 P20: 0.0000000 sec  
 P21: 0.0000000 sec  
 P22: 0.0000000 sec  
 P23: 0.0000000 sec  
 P24: 0.0000000 sec  
 P25: 0.0000000 sec  
 P26: 0.0000000 sec  
 P27: 0.0000000 sec  
 P28: 0.0000000 sec  
 P29: 0.0000000 sec  
 P30: 0.0000000 sec  
 P31: 0.0000000 sec  
 P32: 0.0000000 sec  
 P33: 0.0000000 sec  
 P34: 0.0000000 sec  
 P35: 0.0000000 sec  
 P36: 0.0000000 sec  
 P37: 0.0000000 sec  
 P38: 0.0000000 sec  
 P39: 0.0000000 sec  
 P40: 0.0000000 sec  
 P41: 0.0000000 sec  
 P42: 0.0000000 sec  
 P43: 0.0000000 sec  
 P44: 0.0000000 sec  
 P45: 0.0000000 sec  
 P46: 0.0000000 sec  
 P47: 0.0000000 sec  
 P48: 0.0000000 sec  
 P49: 0.0000000 sec  
 P50: 0.0000000 sec  
 P51: 0.0000000 sec  
 P52: 0.0000000 sec  
 P53: 0.0000000 sec  
 P54: 0.0000000 sec  
 P55: 0.0000000 sec  
 P56: 0.0000000 sec  
 P57: 0.0000000 sec  
 P58: 0.0000000 sec  
 P59: 0.0000000 sec  
 P60: 0.0000000 sec  
 P61: 0.0000000 sec  
 P62: 0.0000000 sec  
 P63: 0.0000000 sec  
 P64: 0.0000000 sec  
 P65: 0.0000000 sec  
 P66: 0.0000000 sec  
 P67: 0.0000000 sec  
 P68: 0.0000000 sec  
 P69: 0.0000000 sec  
 P70: 0.0000000 sec  
 P71: 0.0000000 sec  
 P72: 0.0000000 sec  
 P73: 0.0000000 sec  
 P74: 0.0000000 sec  
 P75: 0.0000000 sec  
 P76: 0.0000000 sec  
 P77: 0.0000000 sec  
 P78: 0.0000000 sec  
 P79: 0.0000000 sec  
 P80: 0.0000000 sec  
 P81: 0.0000000 sec  
 P82: 0.0000000 sec  
 P83: 0.0000000 sec  
 P84: 0.0000000 sec  
 P85: 0.0000000 sec  
 P86: 0.0000000 sec  
 P87: 0.0000000 sec  
 P88: 0.0000000 sec  
 P89: 0.0000000 sec  
 P90: 0.0000000 sec  
 P91: 0.0000000 sec  
 P92: 0.0000000 sec  
 P93: 0.0000000 sec  
 P94: 0.0000000 sec  
 P95: 0.0000000 sec  
 P96: 0.0000000 sec  
 P97: 0.0000000 sec  
 P98: 0.0000000 sec  
 P99: 0.0000000 sec  
 P100: 0.0000000 sec  
 Total time 3 min, 21 sec

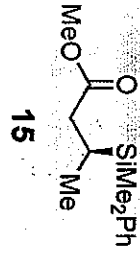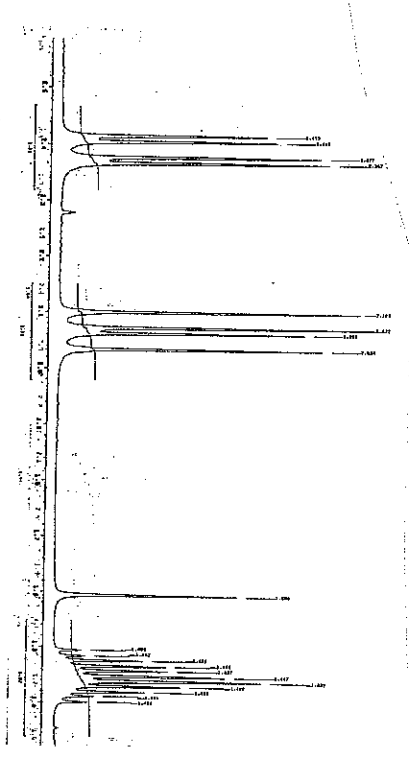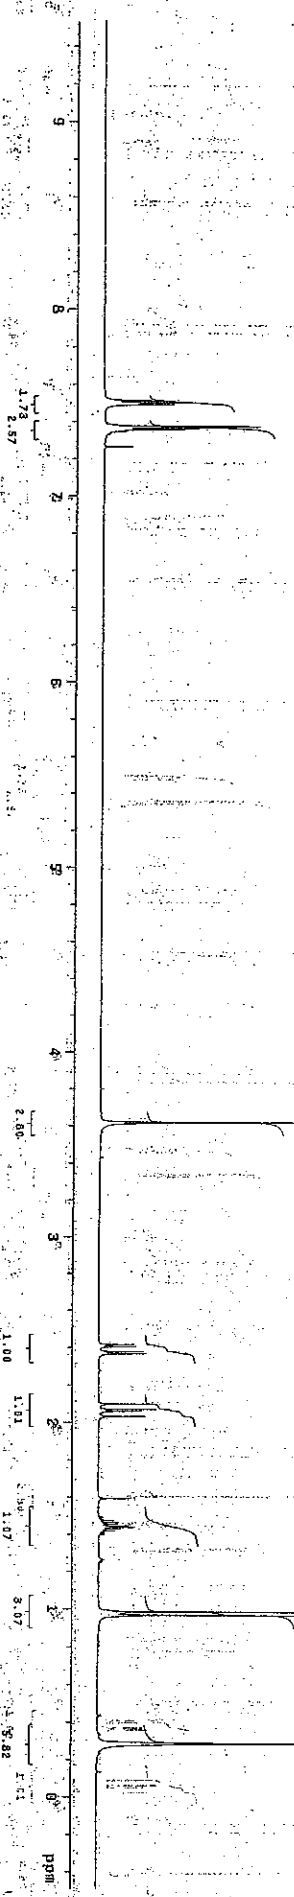

Sample: KL-IX-188-1H  
F11r: cap  
Pulse Sequence: sspu1  
Solvent: cdcl3  
Temp: 25.0 C / 298.1 K  
QNP: 13C  
VPP: 13.0 mm  
VPPMS: 450.13 mm  
Relax: delay 1.000 sec  
Pulse 45.0 degrees  
Pulse 45.0 degrees  
Width 8005.4 Hz  
18 repetitions  
Data Processing  
Resol: enhancement -0.0 Hz  
FT size 55398  
Total time 9 min, 21 sec

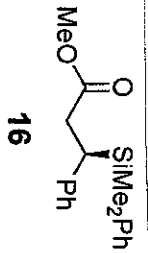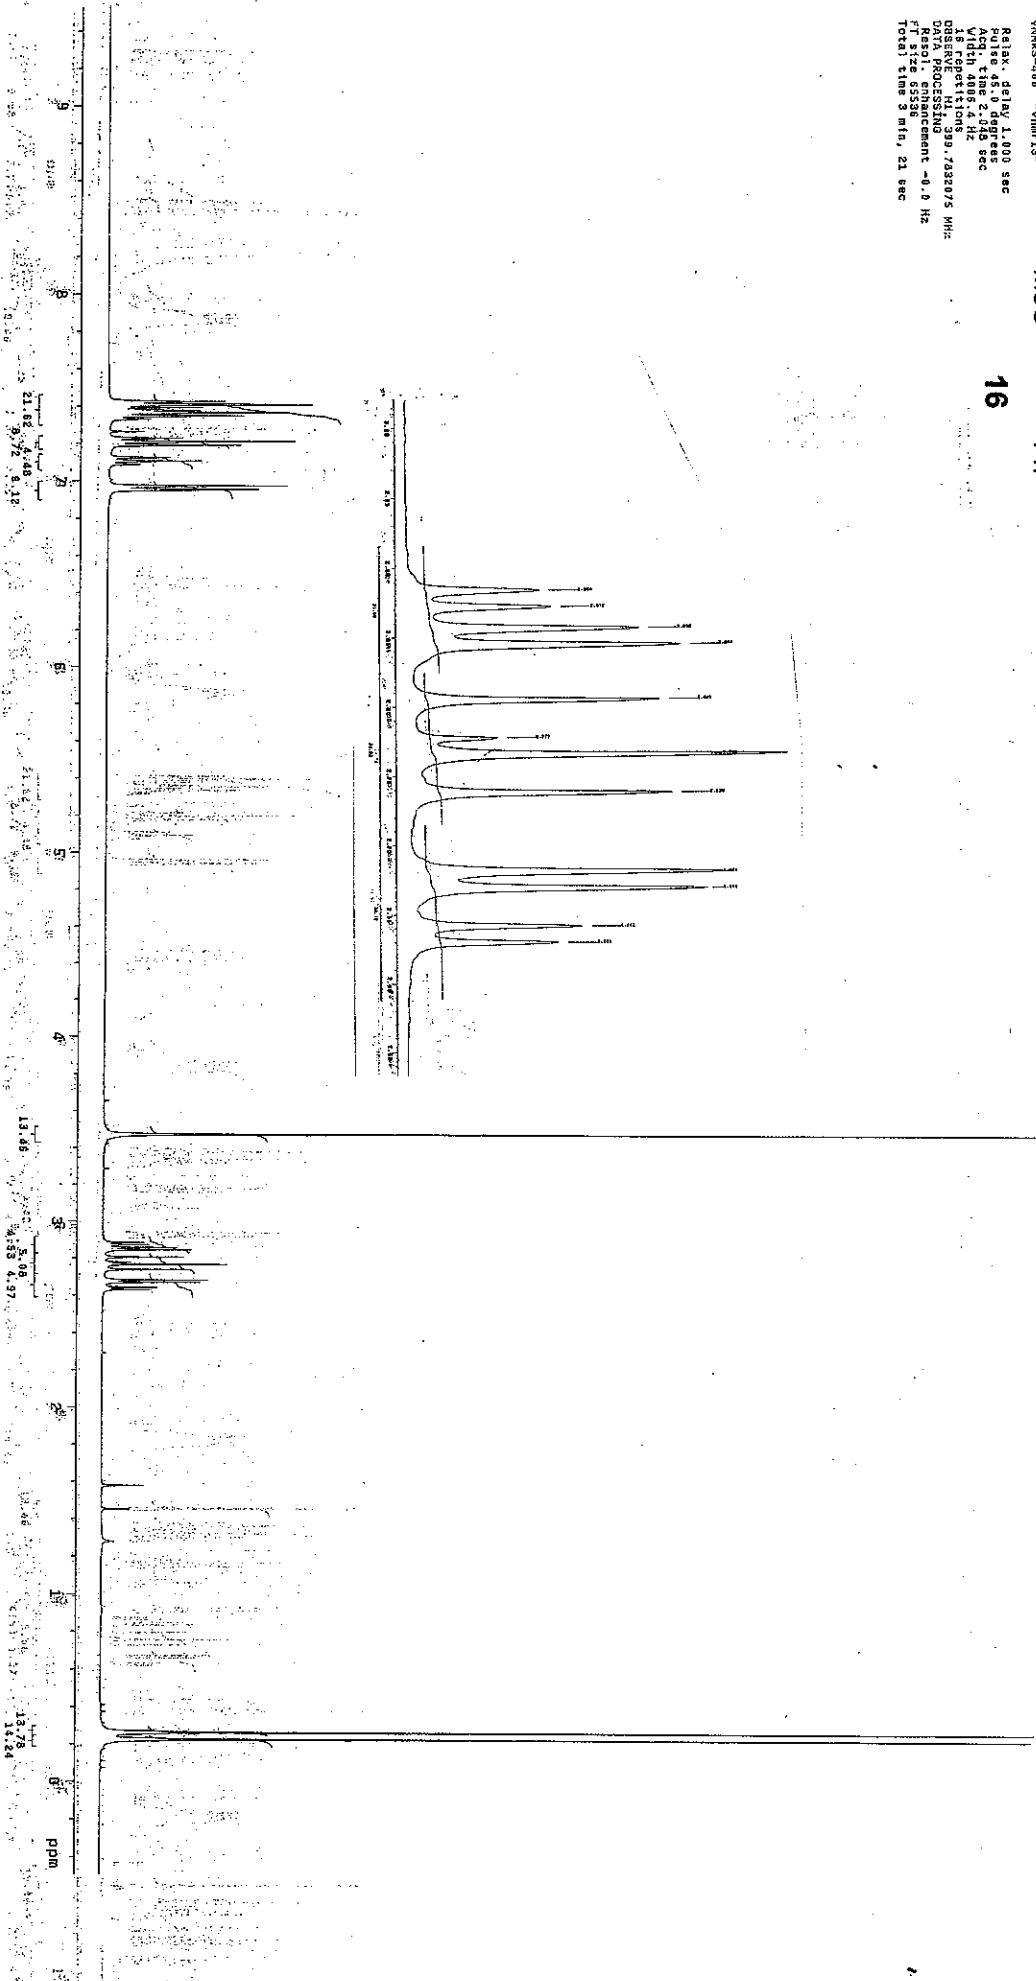







Sample: KI-IX-190-2H  
 File: exp  
 Pulse Sequence: zgpg30  
 Solvent: cdcl3 / 298.1 K  
 Temp: 25.0 C / 298.1 K  
 Operator: leuw  
 VNAME: 400 um13u  
 Relax. delay: 1.000 sec  
 Pulse: 45.0 degrees  
 Acq. time: 2.048 sec  
 24 repetitions  
 OBSERVE: H1, 399.762141 MHz  
 DATA PROCESSING: segment -8.0 Hz  
 FT size 65536  
 Total time 3 min, 21 sec

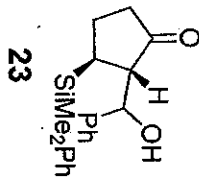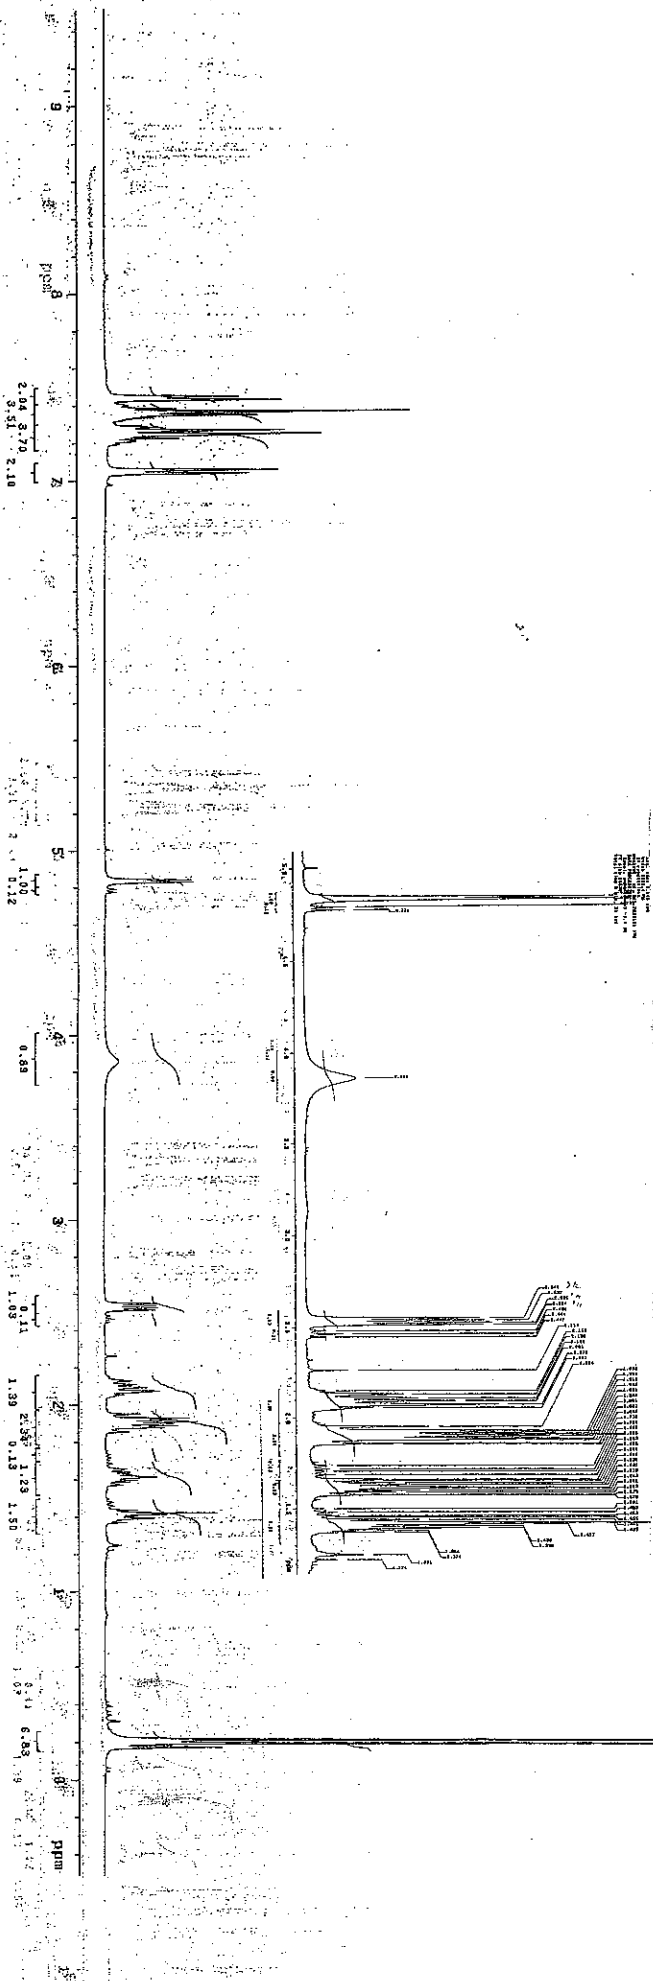



Sample: KL-27-125-1  
Date: 10/19/99  
Pulse Sequence: szpu1

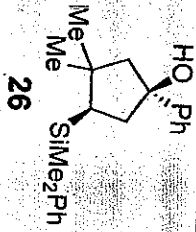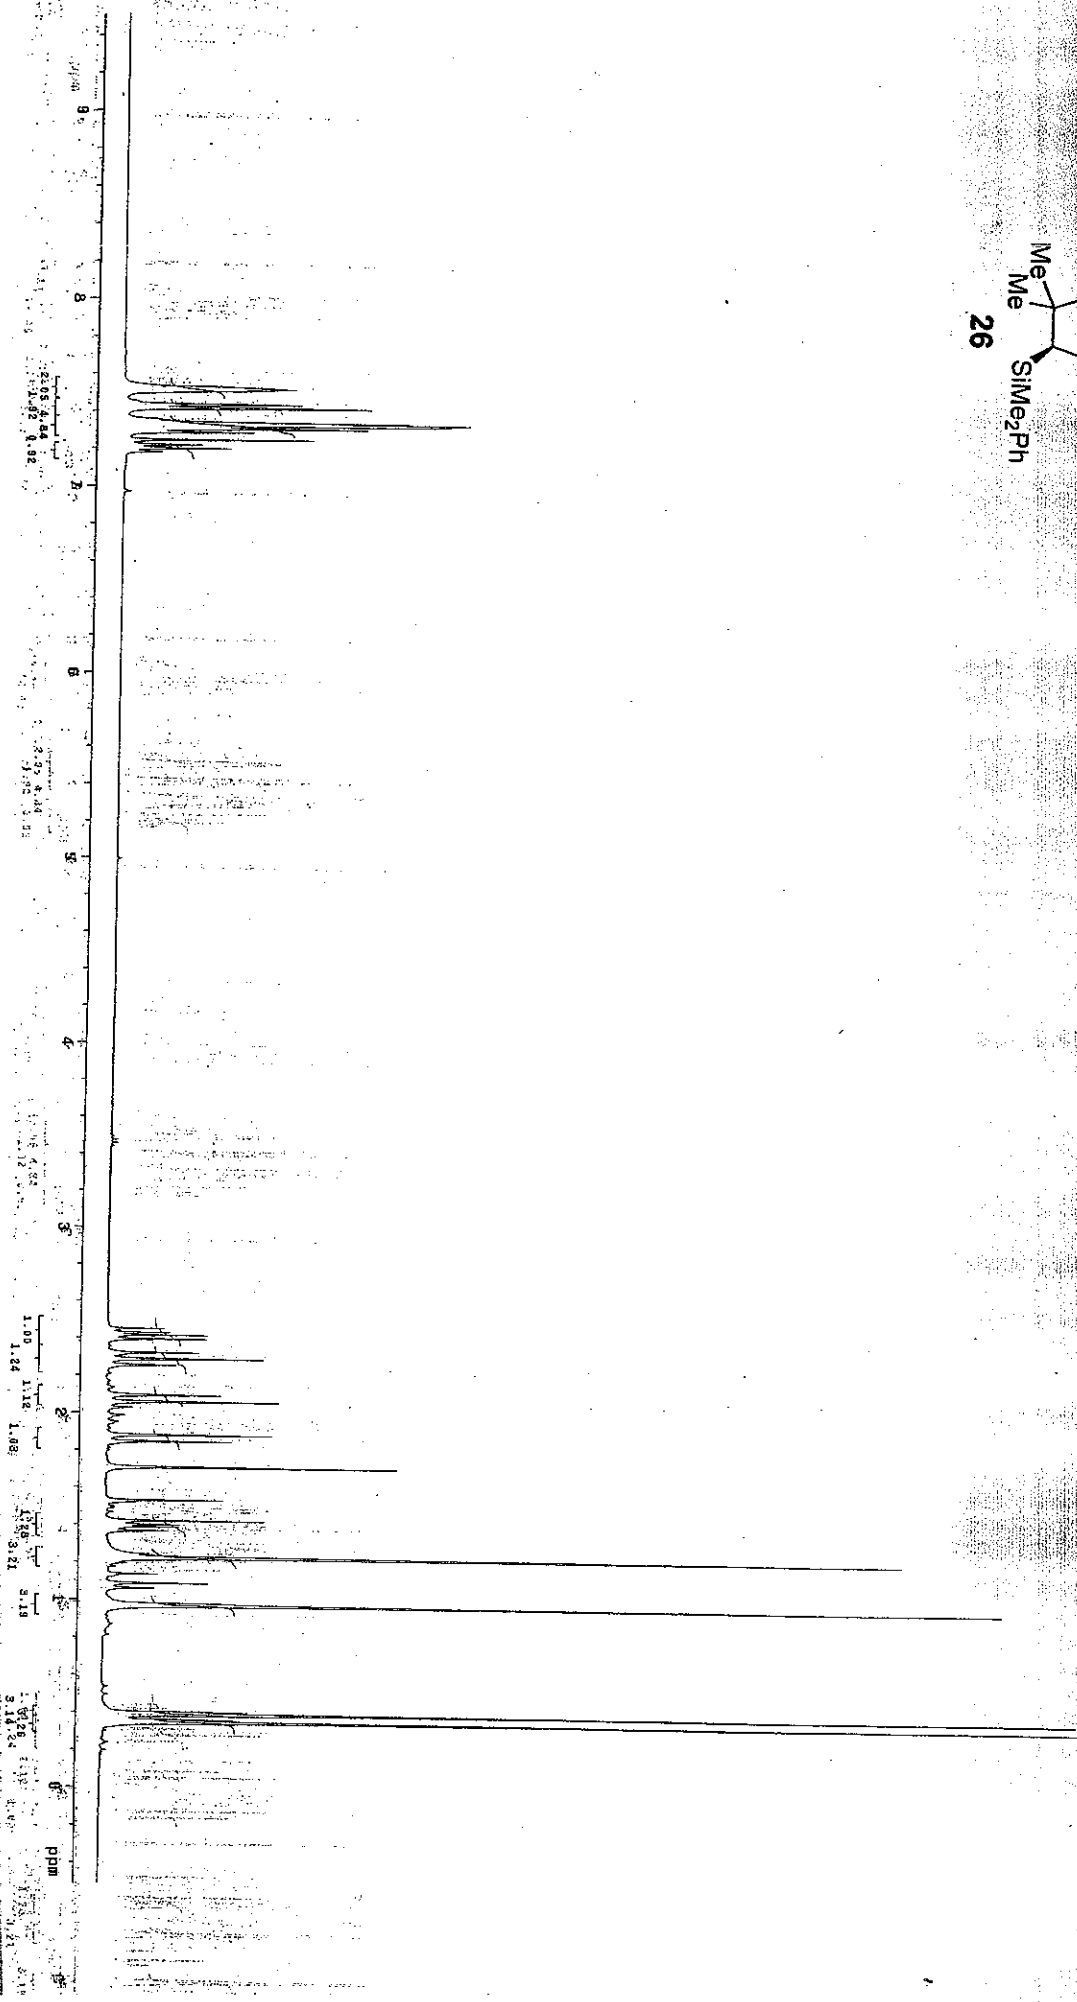

Sample: KL-IX-189-1H  
 File: exp  
 Pulse Sequence: zgpg30  
 Solvent: cdcl3  
 Temp: 25.0 C / 298.1 K  
 Operator: leuw  
 VNAME: 300 Vnmr3  
 Relax: delay 1.000 sec  
 Pulse: 45.0 degrees  
 Acq: time 2.043 sec  
 24 repetitions  
 OBSERVE: H1, 399.783244 MHz  
 PROCSSING: F2 - 1  
 Reference: solvent -0.0 Hz  
 FT size: 6555  
 Total time: 3 min, 21 sec

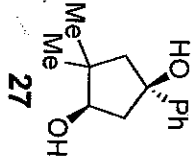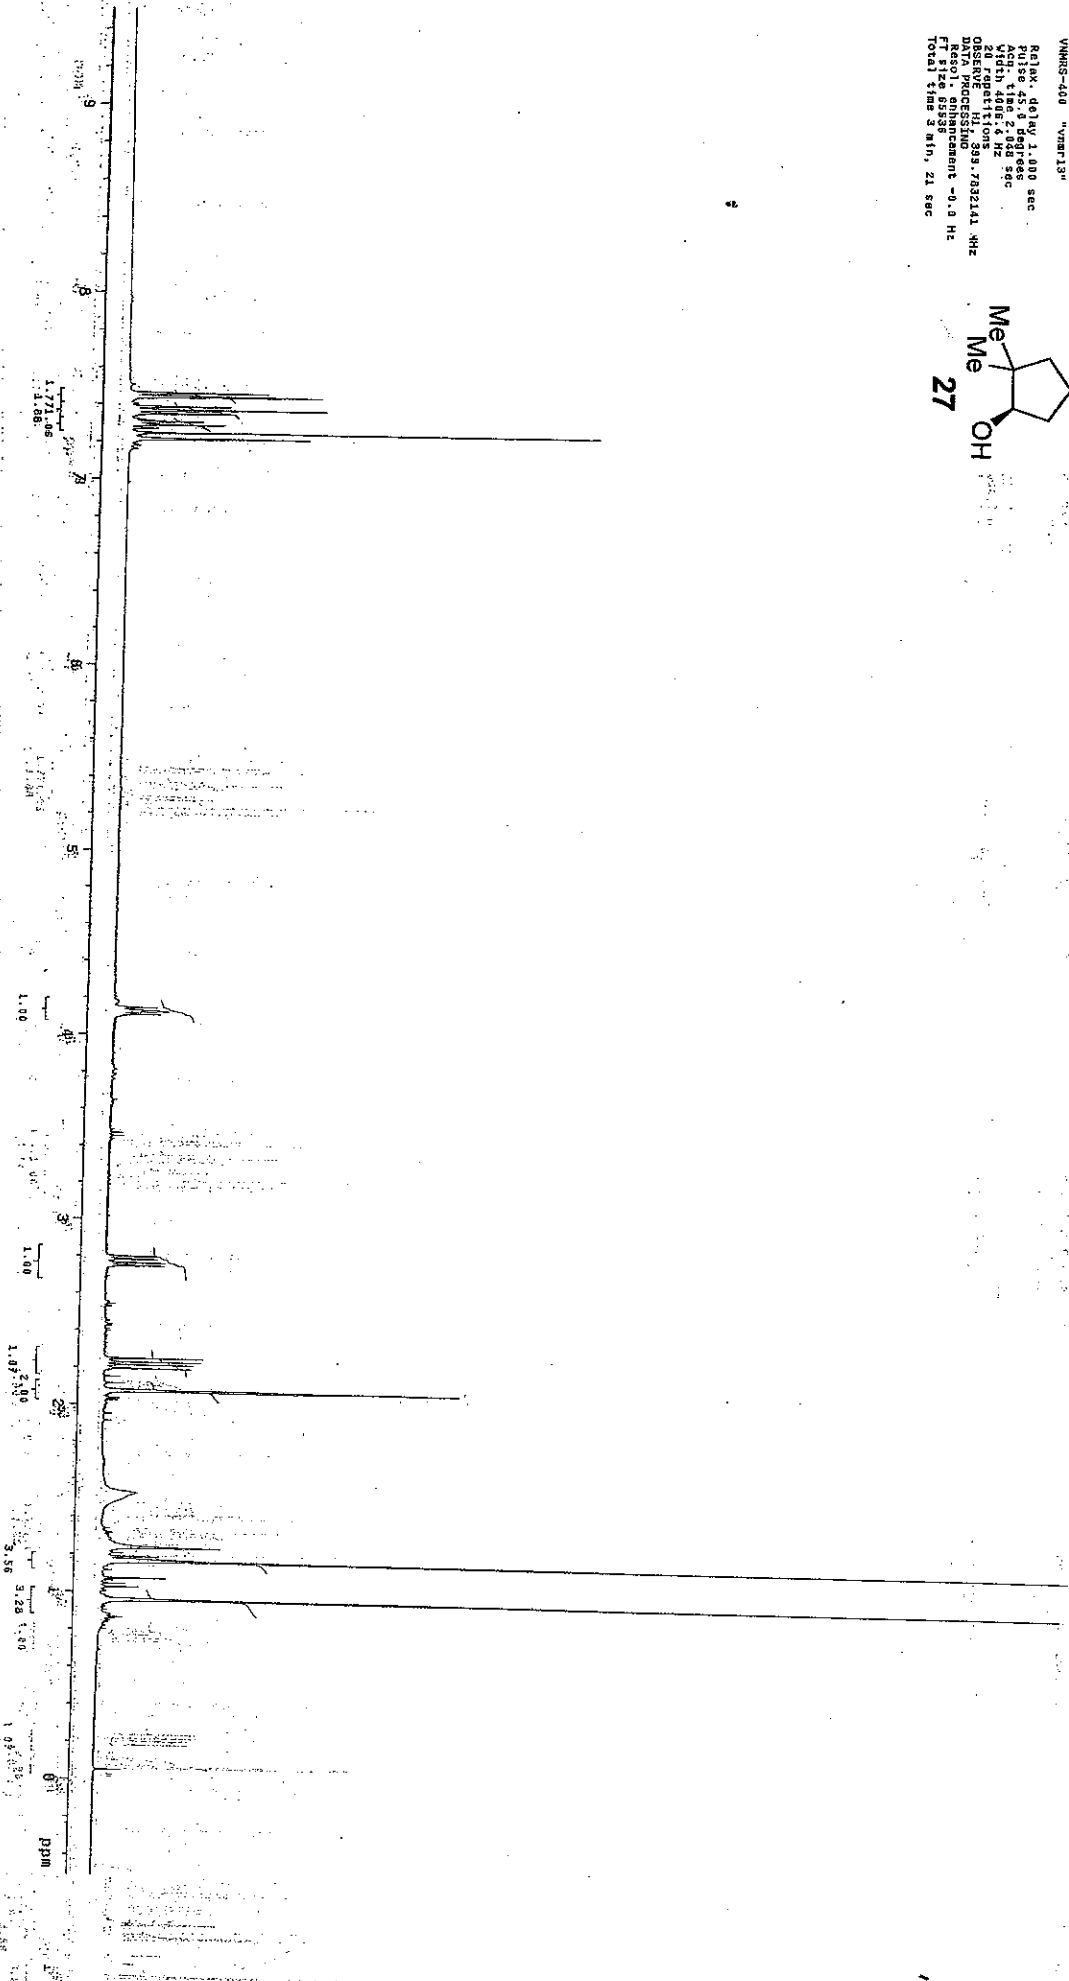

Sample: KL-1X-188-1H  
 F18: exp  
 Pulse Sequence: zgpg30  
 Solvent: cdcl3  
 Temp: 25.0 C / 298.1 K  
 Operator: 18wz  
 VNAME: 400  
 VNAME: 130  
 Relax: delay 1.000 sec  
 Pulse: 45.0 degree  
 Acq: time 2.048 sec  
 24 Fspat: 1.000 Hz  
 OBSERVE: 1H, 398.7882072 MHz  
 DATA PROCESSING  
 FT: size 65535  
 Total time 3 min, 21 sec

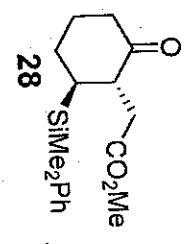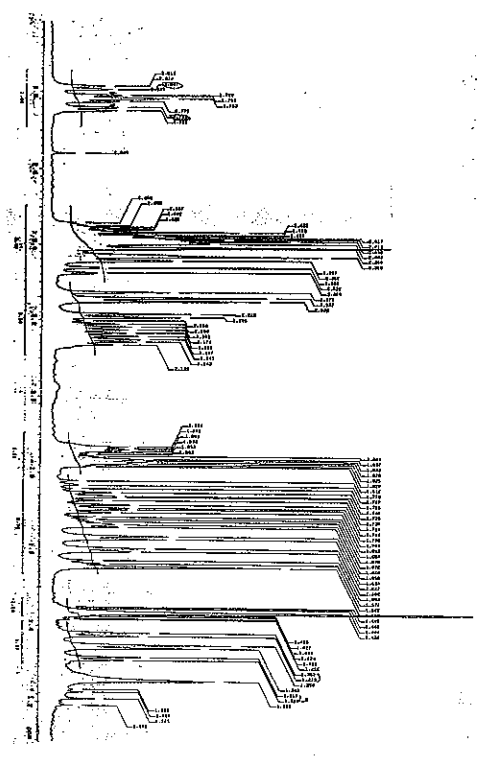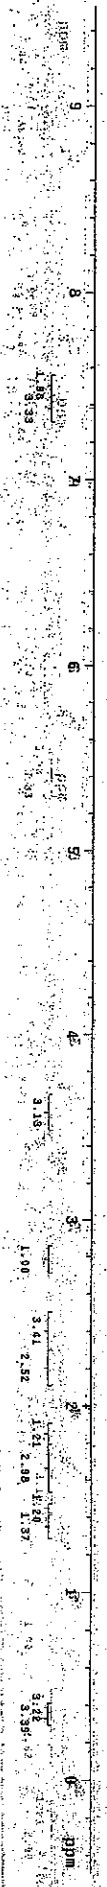

Supplement: NIHMS178777-supplement-1_si_001.pdf [file NIHMS178777-supplement-1_si_001.pdf]
