# Supplementary material
Source: PubMed Central journal article supplement (PMC2836128)

# Enantioselective Conjugate Silyl Additions to Cyclic and Acyclic Unsaturated Carbonyls Catalyzed by Cu Complexes of Chiral *N*-Heterocyclic Carbenes

Kang-sang Lee and Amir H. Hoveyda\*

*Department of Chemistry, Merkert Chemistry Center,  
Boston College, Chestnut Hill, Massachusetts 02467*

## SUPPORTING INFORMATION, PART I

### List of Contents

|                            |             |
|----------------------------|-------------|
| General .....              | Page S2     |
| Compounds in Table 2 ..... | Page S2-S7  |
| Compounds in Table 3 ..... | Page S7-S11 |
| Compound <b>13</b> .....   | Page S12    |
| Compound <b>14</b> .....   | Page S12    |
| Compound <b>15</b> .....   | Page S13    |
| Compound <b>16</b> .....   | Page S13    |
| Compound <b>20</b> .....   | Page S14    |
| Compound <b>21</b> .....   | Page S15    |
| Compound <b>22</b> .....   | Page S16    |
| Compound <b>23</b> .....   | Page S16    |
| Compound <b>24</b> .....   | Page S16    |
| Compound <b>26</b> .....   | Page S16    |
| Compound <b>27</b> .....   | Page S17    |
| Compound <b>28</b> .....   | Page S18    |
| Screening of ligands ..... | Page S19    |

**General.** Infrared (IR) spectra were recorded on a Bruker FT-IR Alpha (ATR mode) spectrophotometer,  $\nu_{\max}$  in  $\text{cm}^{-1}$ . Bands are characterized as broad (br), strong (s), medium (m), and weak (w).  $^1\text{H}$  NMR spectra were recorded on a Varian Unity INOVA 400 (400 MHz) spectrometer. Chemical shifts are reported in ppm from tetramethylsilane with the solvent resonance as the internal standard ( $\text{CDCl}_3$ : 7.26 ppm). Data are reported as follows: chemical shift, integration, multiplicity (s = singlet, d = doublet, t = triplet, q = quartet, sep = septet, bs = broad singlet, m = multiplet), and coupling constants (Hz).  $^{13}\text{C}$  NMR spectra were recorded on a Varian Unity INOVA 400 (100 MHz) spectrometer with complete proton decoupling. Chemical shifts are reported in ppm from tetramethylsilane with the solvent resonance as the internal standard ( $\text{CDCl}_3$ : 77.16 ppm). High-resolution mass spectrometry was performed on a Micromass LCT ESI-MS (positive mode) at the Mass Spectrometry Facility at Boston College. Enantiomer ratios were determined by HPLC analysis (Chiral Technologies Chiralpak AD-H, 4.6 x 250 mm, Chiral Technologies Chiralcel OD, 4.6 x 250 mm, Chiral Technologies Chiralcel AS, 4.6 x 250 mm, and Chiral Technologies Chiralcel OB-H, 4.6 x 250 mm) in comparison with authentic racemic materials. Unless otherwise noted, all reactions were carried out with distilled and degassed solvents under an atmosphere of dry  $\text{N}_2$  in oven- (135 °C) and flame-dried glassware with standard dry box or vacuum-line techniques. Tetrahydrofuran (THF) was purified by distillation from sodium benzophenone ketyl immediately prior to use. All work-up and purification procedures were carried out in air. All solvents were purchased from Doe and Ingalls. (Dimethylphenylsilyl)boronic acid pinacol ester [ $\text{PhMe}_2\text{Si}(\text{Bpin})$ ] was purchased from Aldrich and distilled prior to use. All substrates were purchased from Aldrich and distilled prior to use. 2-Cyclooctenone and dienones (**17** and **18**) were prepared based on a previously reported procedure.<sup>1</sup> Sodium *t*-butoxide and copper(I) chloride were purchased from Strem and used as received.

**NOTE:** It is imperative that dry and pure reagents, Cu salt and imidazolium salt are utilized in order to achieve optimal efficiency and enantioselectivity.

### ■ Representative Procedure for NHC–Cu-Catalyzed Enantioselective Conjugate Silyl

**Additions:** Preparation of the desired NHC–CuOt-Bu: In an oven-dried vial (6 x 1 cm) equipped with a stir bar, imidazolium tetrafluoroborate salt **12** (22 mg, 0.036 mmol), NaOt-Bu (6.9 mg, 0.072 mmol), and CuCl (3.3 mg, 0.033 mmol) were placed and 5.0 mL of THF was added. After the solution was allowed to stir for two hours at 22 °C under a dry  $\text{N}_2$  atmosphere, it was filtered through a short plug of flame-dried Celite.

An appropriate portion of the solution of NHC–CuOt-Bu (0.0033 mmol in 0.50 mL THF) was placed in a separate oven-dried vial (6 x 1 cm), and the resulting solution was charged with  $\text{PhMe}_2\text{Si}(\text{Bpin})$  [96 mg (0.36 mmol) in 0.50 mL THF]. The vessel was then removed from the glovebox, placed in a fume hood and cooled to  $-78$  °C. 2-Cyclohexenone (32 mg, 0.33 mmol)

---

(1) (a) Ito, Y.; Hirao, T.; Saegusa, T. *J. Org. Chem.* **1978**, *43*, 1011–1013. (b) Hayashi, T.; Yamamoto, S.; Tokunaga, N. *Angew. Chem., Int. Ed.* **2005**, *44*, 4224–4227. (c) Henon, H.; Mauduit, M.; Alexakis, A. *Angew. Chem., Int. Ed.* **2008**, *47*, 9122–9124.

was added and the mixture was allowed to stir for one hour at  $-78\text{ }^{\circ}\text{C}$ , after which the reaction was quenched by the addition of  $\text{H}_2\text{O}$  (3 mL) and the mixture was allowed to warm to  $22\text{ }^{\circ}\text{C}$  and stir for an additional 15 minutes. The layers were separated, and the aqueous layer was washed with  $\text{Et}_2\text{O}$  (10 mL x 3). The combined organic layers were dried over  $\text{MgSO}_4$  and filtered. The volatiles were removed *in vacuo* and the resulting light yellow oil was purified by silica gel chromatography (hexanes/ $\text{Et}_2\text{O}$ :5/1) to afford 71 mg (0.31 mmol, 92% yield) of (*S*)-3-(dimethyl(phenyl)silyl)-cyclohexanone **6**, as a colorless oil.  $^1\text{H}$  NMR (400 MHz,  $\text{CDCl}_3$ ):  $\delta$  7.50-7.45 (2H, m), 7.41-7.34 (3H, m), 2.40-2.21 (3H, m), 2.21-2.06 (2H, m), 1.85-1.78 (1H, m), 1.77-1.64 (1H, m), 1.42 (1H, ddd,  $J = 25.6, 12.8, 3.6$  Hz), 1.33-1.25 (1H, m), 0.31 (3H, s), 0.31(3H, s). Optical rotation:<sup>2</sup>  $[\alpha]_{\text{D}}^{20} -75.6$  ( $c$  1.00,  $\text{CHCl}_3$ ) for a sample with 97.4:2.6 er. The spectroscopic data match those reported previously.<sup>3</sup> Enantiomeric purity was determined by HPLC analysis in comparison with authentic racemic material (97.4:2.6 er shown below; chiracel AS column (25 cm x 0.46 cm), 99.7/0.3 hexanes/*i*-PrOH, 1.0 mL/min, 220 nm).

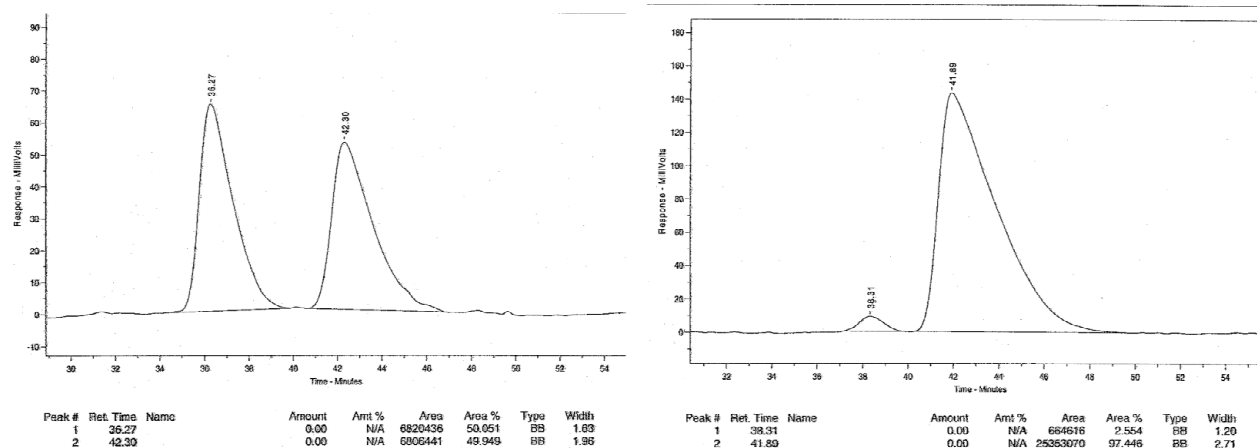

| Retention time | Area    | Area % | Retention time | Area     | Area % |
|----------------|---------|--------|----------------|----------|--------|
| 36.27          | 6820436 | 50.051 | 38.31          | 664616   | 2.554  |
| 42.30          | 6806440 | 49.949 | 41.89          | 25353070 | 97.446 |

**(*S*)-3-(Dimethyl(phenyl)silyl)cyclopentanone (Table 2, entry 1).**  $^1\text{H}$  NMR (400 MHz,  $\text{CDCl}_3$ ):  $\delta$  7.51-7.47 (2H, m), 7.40-7.33 (3H, m), 2.29-2.17 (2H, m), 2.14-2.04 (2H, m), 1.92-1.84 (1H, m), 1.73-1.61 (1H, m), 1.58-1.48 (1H, m), 0.31 (6H, s). Optical rotation:<sup>2</sup>  $[\alpha]_{\text{D}}^{20} -42.9$  ( $c$  2.06,  $\text{CHCl}_3$ ) for a sample with 90:10 er. The spectroscopic data match those reported previously.<sup>3</sup> Enantiomeric purity was determined by HPLC analysis in comparison with authentic racemic material (90:10 er shown below; chiralpak AD-H column (25 cm x 0.46 cm), 99/1 hexanes/*i*-PrOH, 1.0 mL/min, 220 nm).

(2) Walter, C.; Auer, G.; Oestreich, M. *Angew. Chem., Int. Ed.* **2006**, *45*, 5675–5677.

(3) Ito, H.; Ishizuka, T.; Tateiwa, J.-i.; Sonoda, M.; Hosomi, A. *J. Am. Chem. Soc.* **1998**, *120*, 11196–11197.

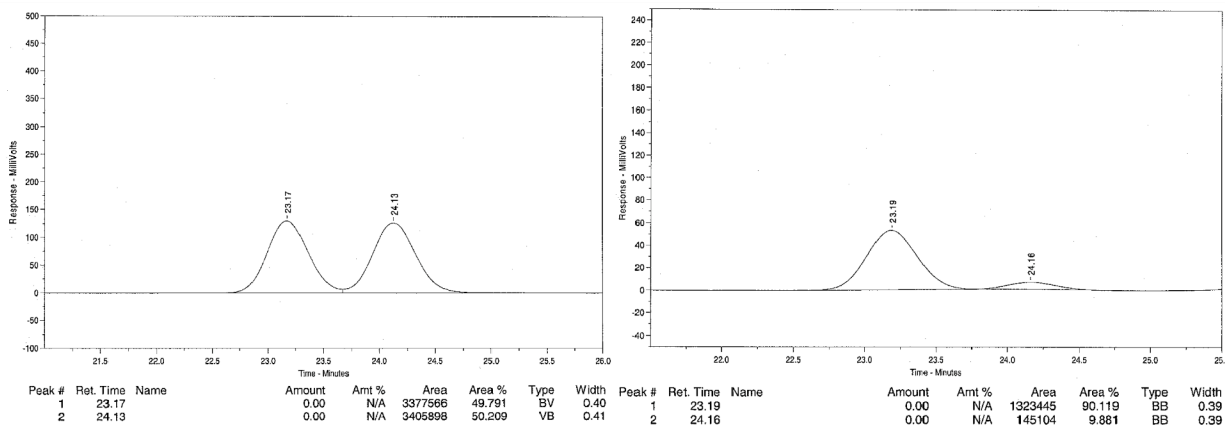

| Retention time | Area    | Area % | Retention time | Area    | Area % |
|----------------|---------|--------|----------------|---------|--------|
| 23.17          | 3377566 | 49.791 | 23.19          | 1323445 | 90.119 |
| 24.13          | 3405898 | 50.209 | 24.16          | 145104  | 9.881  |

**(S)-3-(Dimethyl(phenyl)silyl)cycloheptanone (Table 2, entry 3).** IR (neat): 2921 (m), 2849 (w), 1696 (s), 1443 (m), 1248 (s)  $\text{cm}^{-1}$ ;  $^1\text{H}$  NMR (400 MHz,  $\text{CDCl}_3$ ):  $\delta$  7.49-7.46 (2H, m), 7.38-7.32 (3H, m), 2.59-2.26 (4H, m), 2.08-1.85 (3H, m), 1.54-1.42 (1H, m), 1.33-1.03 (3H, m), 0.29 (3H, s), 0.28 (3H, s);  $^{13}\text{C}$  NMR (100 MHz,  $\text{CDCl}_3$ ):  $\delta$  216.0, 137.7, 134.6, 129.9, 128.5, 45.2, 44.1, 32.5, 31.8, 25.0, 24.0, -4.3, -4.5; HRMS ( $\text{ES}^+$ ) Calcd for  $\text{C}_{15}\text{H}_{22}\text{SiONa}$  [ $\text{M}+\text{Na}$ ]: 269.1338, Found: 269.1329. Optical rotation:<sup>2</sup>  $[\alpha]_{\text{D}}^{20}$  -75.0 ( $c$  1.00,  $\text{CHCl}_3$ ) for a sample with 97:3 er. Enantiomeric purity was determined by HPLC analysis in comparison with authentic racemic material (97:3 er shown below; chiralcel AS column (25 cm x 0.46 cm), 99.7/0.3 hexanes/*i*-PrOH, 1.0 mL/min, 220 nm).

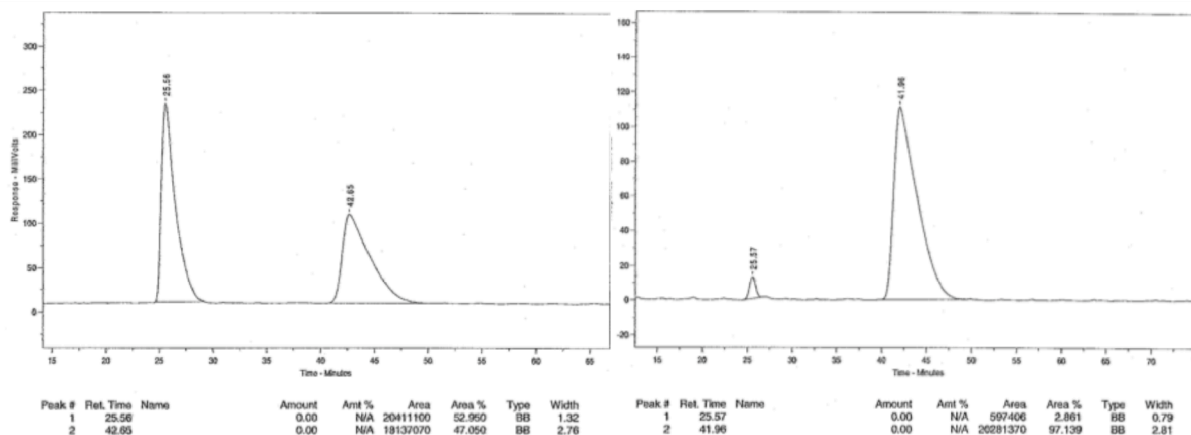

| Retention time | Area     | Area % | Retention time | Area     | Area % |
|----------------|----------|--------|----------------|----------|--------|
| 25.56          | 20411100 | 52.950 | 25.57          | 597406   | 2.861  |
| 42.65          | 18137070 | 47.050 | 41.96          | 20281370 | 97.139 |

**3-(Dimethyl(phenyl)silyl)cyclooctanone (Table 2, entry 4).** IR (neat): 2927 (m), 2857 (w), 1697 (s), 1408 (m), 1248 (s)  $\text{cm}^{-1}$ ;  $^1\text{H}$  NMR (400 MHz,  $\text{CDCl}_3$ ):  $\delta$  7.52-7.48 (2H, m), 7.40-7.33 (3H, m), 2.57-2.50 (1H, m), 2.34-2.18 (3H, m), 1.88-1.76 (2H, m), 1.70-1.53 (3H, m), 1.48-1.19 (4H, m), 0.31 (3H, s), 0.31 (3H, s);  $^{13}\text{C}$  NMR (100 MHz,  $\text{CDCl}_3$ ):  $\delta$  219.6, 137.5, 134.1, 129.4, 128.1, 43.2, 41.7, 28.3, 27.1, 26.5, 26.2, 24.1, -4.6, -4.8; HRMS ( $\text{ES}^+$ ) Calcd for  $\text{C}_{16}\text{H}_{24}\text{SiONa}$



[M+Na]: 283.1494, Found: 283.1495. Optical rotation:  $[\alpha]_D^{20} +25.4$  ( $c$  1.45,  $\text{CHCl}_3$ ) for a sample with 98:2 er. Enantiomeric purity was determined by HPLC analysis in comparison with authentic racemic material (98:2 er shown below; chiracel AS column (25 cm x 0.46 cm), 99.7/0.3 hexanes/*i*-PrOH, 1.0 mL/min, 220 nm).

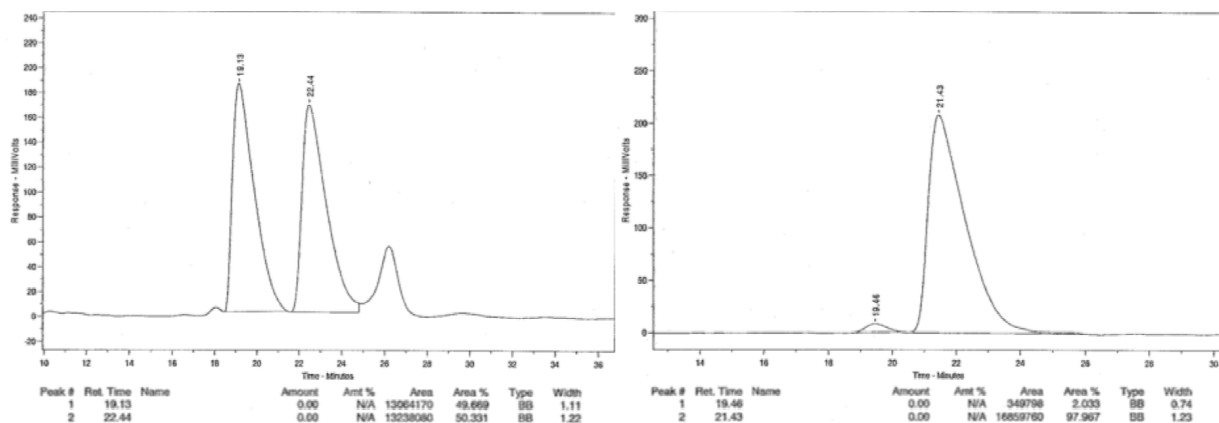

| Retention time | Area     | Area % | Retention time | Area     | Area % |
|----------------|----------|--------|----------------|----------|--------|
| 19.13          | 13064170 | 49.669 | 19.46          | 349798   | 2.033  |
| 22.44          | 13238080 | 50.331 | 21.43          | 16859760 | 97.967 |

**(R)-4-(Dimethyl(phenyl)silyl)-3,3-dimethylcyclopentanone (Table 2, entry 5).** IR (neat): 2954 (m), 1738 (s), 1427 (m), 1402 (m), 1250 (s)  $\text{cm}^{-1}$ ;  $^1\text{H}$  NMR (400 MHz,  $\text{CDCl}_3$ ):  $\delta$  7.54-7.50 (2H, m), 7.38-7.33 (3H, m), 2.38-2.23 (2H, m), 2.63 (2H, dd,  $J = 29.6, 17.6$  Hz), 1.51 (1H, dd,  $J = 12.8, 9.2$  Hz), 1.10 (3H, s), 1.00 (3H, s), 0.42 (3H, s), 0.38 (3H, s);  $^{13}\text{C}$  NMR (100 MHz,  $\text{CDCl}_3$ ):  $\delta$  220.6, 139.1, 134.4, 129.8, 128.6, 57.3, 40.7, 40.6, 36.8, 30.8, 26.3, -1.6, -2.2; HRMS ( $\text{ES}^+$ ) Calcd for  $\text{C}_{15}\text{H}_{22}\text{SiO}_2\text{Na}$  [M+Na]: 269.1338, Found: 269.1335. Optical rotation:  $[\alpha]_D^{20} -118.6$  ( $c$  1.05,  $\text{CHCl}_3$ ) for a sample with 99:1 er. Enantiomeric purity was determined by HPLC analysis in comparison with authentic racemic material (99:1 er shown below; chiracel OD column (25 cm x 0.46 cm), 99.9/0.1 hexanes/*i*-PrOH, 1.0 mL/min, 220 nm).

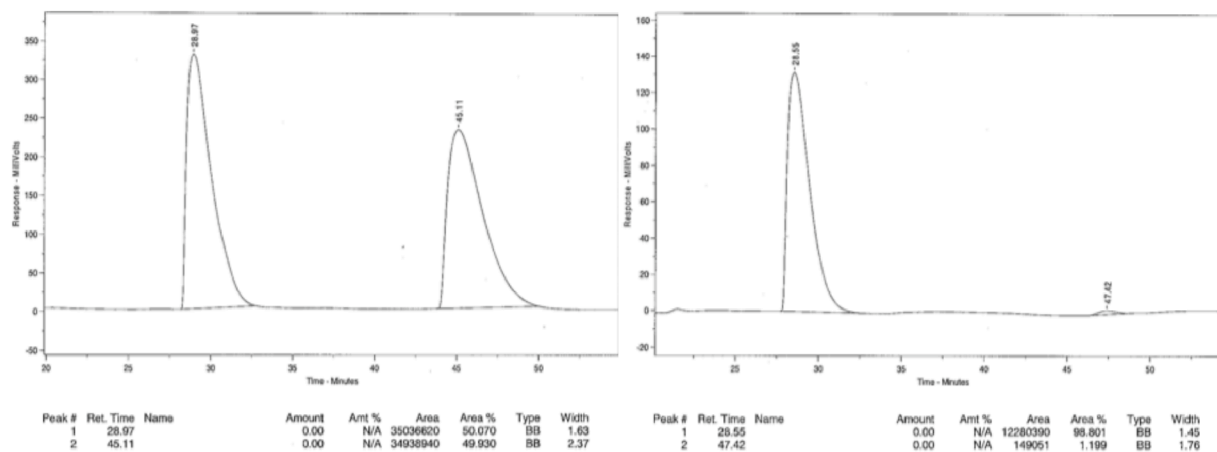

| Retention time | Area     | Area % | Retention time | Area     | Area % |
|----------------|----------|--------|----------------|----------|--------|
| 28.97          | 35036620 | 50.070 | 28.55          | 12280390 | 98.801 |
| 45.11          | 34938940 | 49.930 | 47.42          | 149051   | 1.199  |

**(R)-3-(Dimethyl(phenyl)silyl)-4,4-dimethylcyclohexanone (Table 2, entry 6).**  $^1\text{H}$  NMR (400 MHz,  $\text{CDCl}_3$ ):  $\delta$  7.51-7.46 (2H, m), 7.36-7.33 (3H, m), 2.45-2.19 (4H, m), 1.73-1.61 (2H, m), 1.37 (1H, dd,  $J = 14.0, 3.6$  Hz), 1.10 (3H, s), 0.98 (3H, s), 0.39 (3H, s), 0.36 (3H, s). Optical rotation:  $[\alpha]_{\text{D}}^{20} -71.7$  ( $c$  1.30,  $\text{CHCl}_3$ ) for a sample with 99:1 er. The spectroscopic data match those reported previously.<sup>4</sup> Enantiomeric purity was determined by HPLC analysis in comparison with authentic racemic material (99:1 er shown below; chiracel OD column (25 cm x 0.46 cm), 99/1 hexanes/*i*-PrOH, 1.0 mL/min, 220 nm).

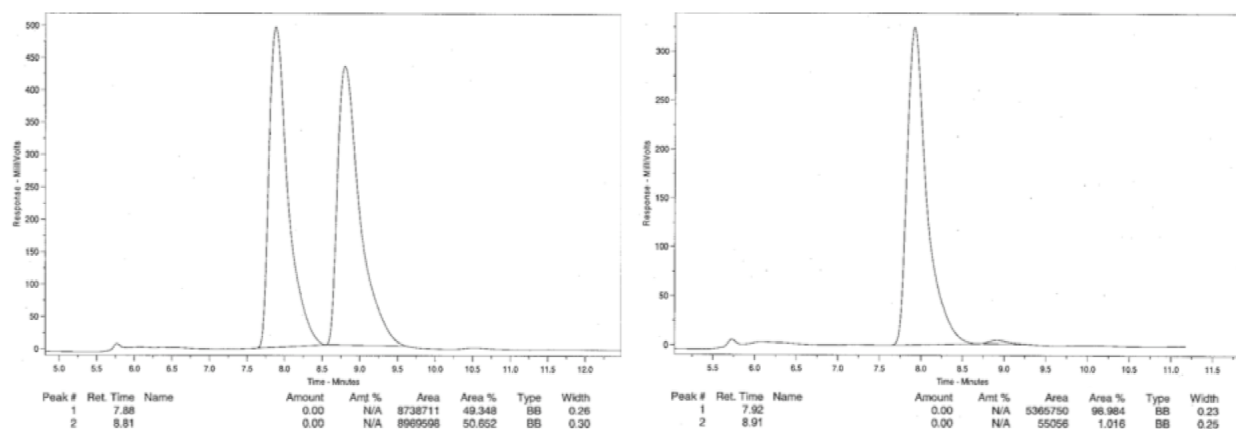

| Retention time | Area    | Area % | Retention time | Area    | Area % |
|----------------|---------|--------|----------------|---------|--------|
| 7.88           | 8738711 | 49.348 | 7.92           | 5365750 | 98.984 |
| 8.81           | 8969598 | 50.652 | 8.91           | 55056   | 1.016  |

**(S)-7-(Dimethyl(phenyl)silyl)-6,7,8,9-tetrahydro-5H-benzo[7]annulen-5-one (Table 2, entry 7).** IR (neat): 2951 (m), 1672 (s), 1598 (m), 1427 (m), 1250 (s)  $\text{cm}^{-1}$ ;  $^1\text{H}$  NMR (400 MHz,  $\text{CDCl}_3$ ):  $\delta$  7.76 (1H, dd,  $J = 6.0, 1.2$  Hz), 7.53-7.50 (2H, m), 7.45 (1H, td,  $J = 6.0, 1.2$  Hz), 7.43-7.32 (4H, m), 7.18 (1H, d,  $J = 6.0$  Hz), 2.97-2.91 (1H, m), 2.89-2.73 (2H, m), 2.54 (1H, dd,  $J = 13.6, 10.4$  Hz), 1.90-1.78 (2H, m), 1.30-1.23 (1H, m), 0.35 (3H, s), 0.34 (3H, s);  $^{13}\text{C}$  NMR (100 MHz,  $\text{CDCl}_3$ ):  $\delta$  207.3, 140.9, 138.7, 137.1, 134.2, 132.6, 129.7, 129.5, 128.9, 128.1, 127.0, 41.9, 33.3, 27.1, 18.9, -4.7, -4.8; HRMS ( $\text{ES}^+$ ) Calcd for  $\text{C}_{19}\text{H}_{26}\text{SiNO}$  [ $\text{M}+\text{NH}_4$ ]: 312.1784, Found: 312.1770. Optical rotation:  $[\alpha]_{\text{D}}^{20} +2.80$  ( $c$  1.00,  $\text{CHCl}_3$ ) for a sample with 96.5:3.5 er. Enantiomeric purity was determined by HPLC analysis in comparison with authentic racemic material (96.5:3.5 er shown below; chiralpak AD-H column (25 cm x 0.46 cm), 99/1 hexanes/*i*-PrOH, 0.9 mL/min, 220 nm).

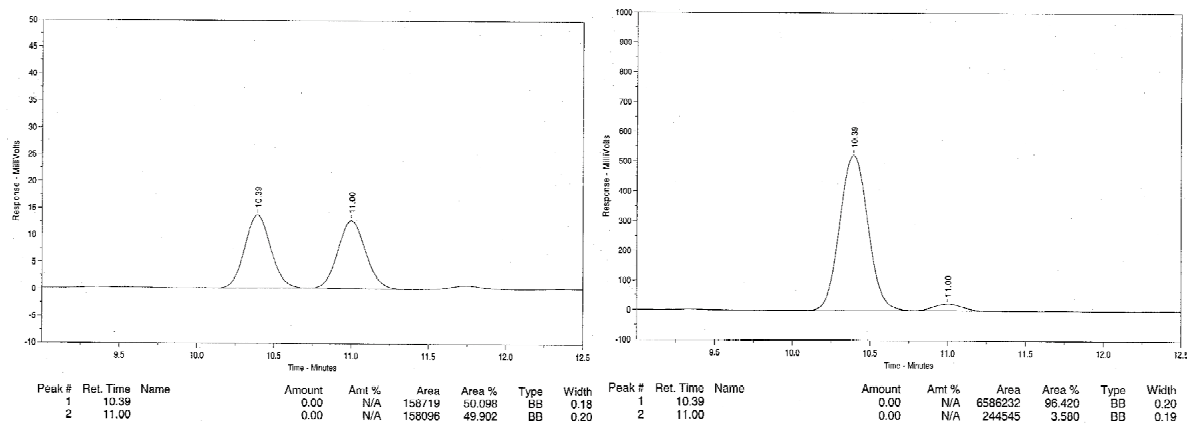

| Retention time | Area   | Area % | Retention time | Area    | Area % |
|----------------|--------|--------|----------------|---------|--------|
| 10.39          | 158719 | 50.098 | 10.39          | 6586232 | 96.420 |
| 11.00          | 158096 | 49.902 | 11.00          | 244545  | 3.580  |

**(S)-4-(Dimethyl(phenyl)silyl)tetrahydro-2H-pyran-2-one (Table 2, entry 8).**  $^1\text{H}$  NMR (400 MHz,  $\text{CDCl}_3$ ):  $\delta$  7.49-7.46 (2H, m), 7.43-7.35 (3H, m), 4.34 (1H, dt,  $J = 10.8, 4.8$  Hz), 4.25 (1H, ddd,  $J = 10.8, 10.0, 4.0$  Hz), 2.57 (1H, ddd,  $J = 17.2, 6.0, 1.6$  Hz), 2.28 (1H, dd,  $J = 17.6, 13.2$  Hz), 1.88-1.81 (1H, m), 1.70-1.60 (1H, m), 1.44-1.36 (1H, m), 0.34 (6H, s). Optical rotation:  $[\alpha]_D^{20} -29.6$  ( $c$  1.50,  $\text{CHCl}_3$ ) for a sample with 92:8 er. The spectroscopic data match those reported previously.<sup>5</sup> Enantiomeric purity was determined by HPLC analysis in comparison with authentic racemic material (92:8 er shown below; chiralpak AD-H column (25 cm x 0.46 cm), 99/1 hexanes/*i*-PrOH, 0.9 mL/min, 220 nm).

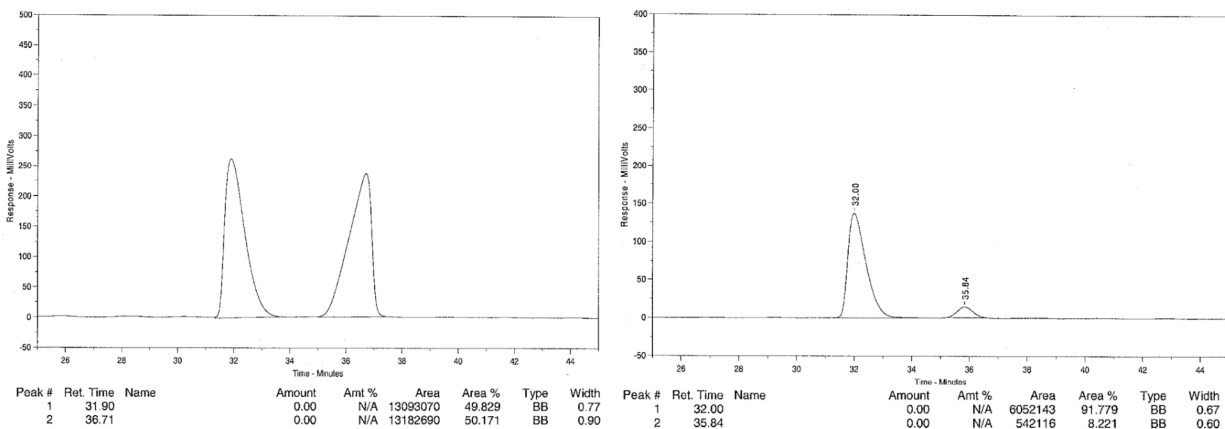

| Retention time | Area     | Area % | Retention time | Area    | Area % |
|----------------|----------|--------|----------------|---------|--------|
| 31.90          | 13093070 | 49.829 | 32.00          | 6052143 | 91.779 |
| 36.71          | 13182690 | 50.171 | 35.84          | 542116  | 8.221  |

**(S)-4-(Dimethyl(phenyl)silyl)pentan-2-one (Table 3, entry 1).**  $^1\text{H}$  NMR (400 MHz,  $\text{CDCl}_3$ ):  $\delta$  7.52-7.47 (2H, m), 7.39-7.33 (3H, m), 2.42 (1H, dd,  $J = 16.4, 3.6$  Hz), 2.18 (1H, dd,  $J = 16.0, 10.8$  Hz), 2.07 (3H, s), 1.54-1.45 (1H, m), 0.93 (3H, d,  $J = 7.2$  Hz), 0.29 (3H, s), 0.28 (3H, s). Optical rotation:  $[\alpha]_D^{20} +26.2$  ( $c$  0.55,  $\text{CHCl}_3$ ) for a sample with 97:3 er. The spectroscopic data

match those reported previously and the absolute configuration was assigned by comparison with reported data.<sup>6</sup> Enantiomeric purity was determined by HPLC analysis in comparison with authentic racemic material (97:3 er shown below; chirapak AD-H column (25 cm x 0.46 cm), 99.8/0.2 hexanes/*i*-PrOH, 0.5 mL/min, 220 nm).

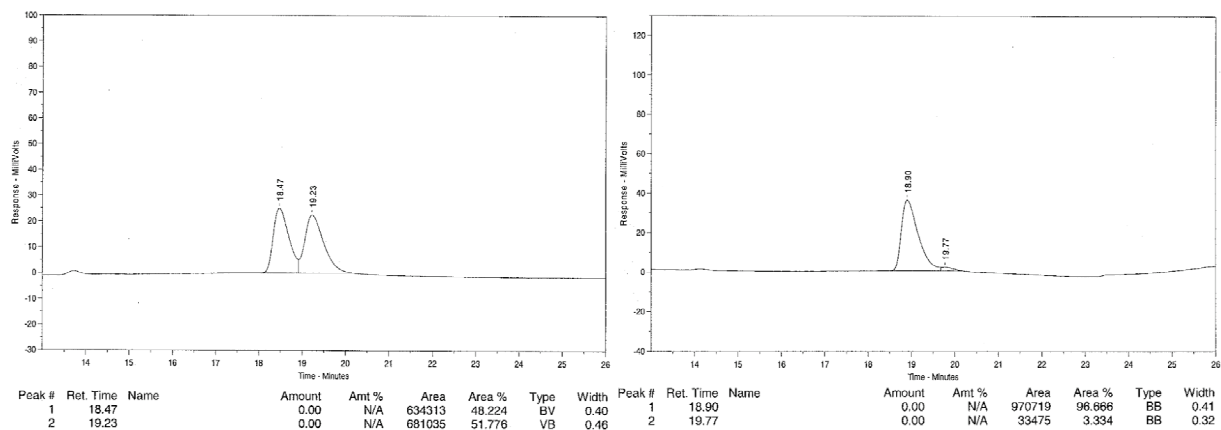

| Retention time | Area   | Area % | Retention time | Area   | Area % |
|----------------|--------|--------|----------------|--------|--------|
| 18.47          | 634313 | 48.224 | 18.90          | 970719 | 96.666 |
| 19.23          | 681035 | 51.776 | 19.77          | 33475  | 3.334  |

**(S)-4-(Dimethyl(phenyl)silyl)nonan-2-one (Table 3, entry 2).** IR (neat): 2955 (m), 2925 (m), 1716 (s), 1427 (m)  $\text{cm}^{-1}$ ;  $^1\text{H}$  NMR (400 MHz,  $\text{CDCl}_3$ ):  $\delta$  7.51-7.48 (2H, m), 7.36-7.31 (3H, m), 2.41 (1H, dd,  $J = 17.2, 5.2$  Hz), 2.31 (1H, dd,  $J = 17.2, 8.0$  Hz), 2.03 (3H, s), 1.54-1.38 (2H, m), 1.30-1.10 (7H, m), 0.85-0.82 (3H, m), 0.28 (3H, s), 0.27 (3H, s);  $^{13}\text{C}$  NMR (100 MHz,  $\text{CDCl}_3$ ):  $\delta$  209.2, 138.2, 133.9, 128.9, 127.7, 44.5, 32.0, 30.5, 29.8, 28.8, 22.5, 20.3, 14.0, -3.9, -4.4; HRMS (ESI<sup>+</sup>) Calcd for  $\text{C}_{17}\text{H}_{28}\text{SiO}$  [M<sup>+</sup>]: 276.1909, Found: 276.1923. Optical rotation:  $[\alpha]_{\text{D}}^{20} +36.0$  ( $c$  1.97,  $\text{CHCl}_3$ ) for a sample with 98:2 er. The absolute configuration was assigned by analogy to entry 1 in Table 3. Enantiomeric purity was determined by HPLC analysis in comparison with authentic racemic material (98:2 er shown below; chiracel AS column (25 cm x 0.46 cm), 99.9/0.1 hexanes/*i*-PrOH, 1.0 mL/min, 220 nm).

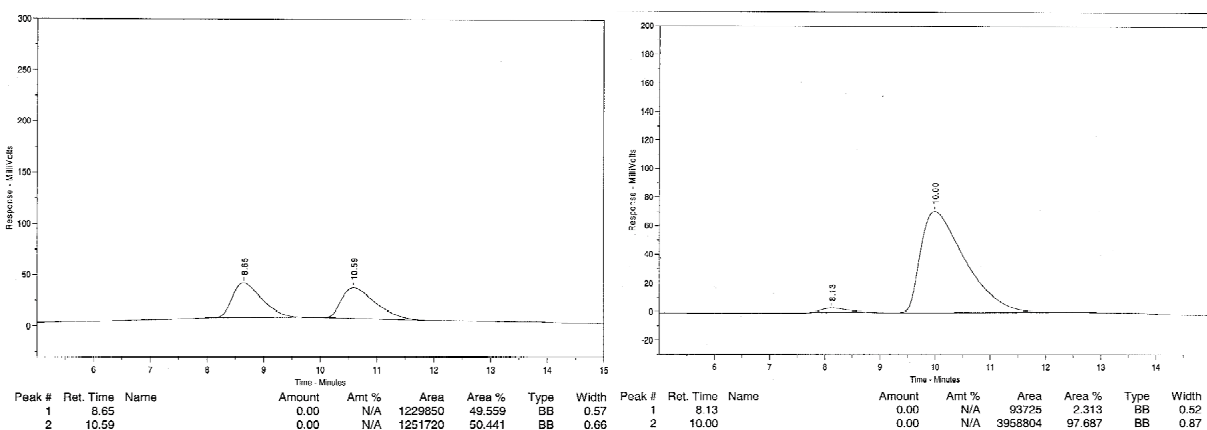

| Retention time | Area    | Area % | Retention time | Area    | Area % |
|----------------|---------|--------|----------------|---------|--------|
| 8.65           | 1229850 | 49.559 | 8.13           | 93725   | 2.313  |
| 10.59          | 1251720 | 50.441 | 10.00          | 3958804 | 97.687 |

**(R)-4-(Dimethyl(phenyl)silyl)-5-methylhexan-2-one (Table 3, entry 3).**  $^1\text{H}$  NMR (400 MHz,  $\text{CDCl}_3$ ):  $\delta$  7.52-7.48 (2H, m), 7.36-7.32 (3H, m), 2.45 (1H, dd,  $J = 17.6, 7.2$  Hz), 2.36 (1H, dd,  $J = 17.6, 5.2$  Hz), 2.00 (3H, s), 1.93-1.82 (1H, m), 1.63-1.57 (1H, m), 0.88 (3H, d,  $J = 6.8$  Hz), 0.82 (3H, d,  $J = 7.2$  Hz), 0.33 (3H, s), 0.30 (3H, s);  $^{13}\text{C}$  NMR (100 MHz,  $\text{CDCl}_3$ ):  $\delta$  209.9, 139.6, 134.6, 129.5, 128.4, 42.0, 30.4, 29.5, 28.2, 23.6, 21.9, -1.6, -2.4. Optical rotation:  $[\alpha]_{\text{D}}^{20} +18.6$  ( $c$  2.45,  $\text{CHCl}_3$ ) for a sample with 97:3 er. The spectroscopic data match those reported previously<sup>6</sup> and the absolute configuration was assigned by analogy to entry 1 in Table 3. Enantiomeric purity was determined by HPLC analysis in comparison with authentic racemic material (97:3 er shown below; chiracel AS column (25 cm x 0.46 cm), 99.9/0.1 hexanes/*i*-PrOH, 1.0 mL/min, 220 nm).

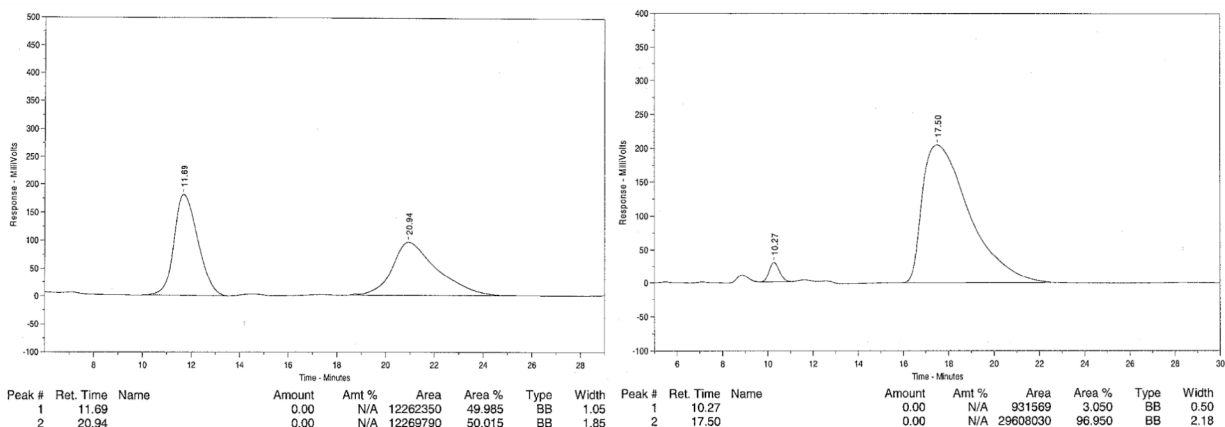

| Retention time | Area     | Area % | Retention time | Area     | Area % |
|----------------|----------|--------|----------------|----------|--------|
| 11.69          | 12262350 | 49.985 | 10.27          | 931569   | 3.050  |
| 20.94          | 12269790 | 50.015 | 17.50          | 29608030 | 96.950 |

**(R)-4-(Dimethyl(phenyl)silyl)-4-phenylbutan-2-one (Table 3, entry 4).**  $^1\text{H}$  NMR (400 MHz,  $\text{CDCl}_3$ ):  $\delta$  7.39-7.30 (5H, m), 7.19-7.15 (2H, m), 7.09-7.04 (1H, m), 6.93-6.91 (2H, m), 2.93-2.83 (2H, m), 2.62 (1H, dd,  $J = 22.8, 11.2$  Hz), 1.92 (3H, s), 0.23 (3H, s), 0.20 (3H, s). Optical rotation:  $[\alpha]_{\text{D}}^{20} +11.7$  ( $c$  1.00,  $\text{CHCl}_3$ ) for a sample with 98.5:1.5 er. The spectroscopic data match those reported previously and the absolute configuration was assigned by comparison with reported data.<sup>7</sup> Enantiomeric purity was determined by HPLC analysis in comparison with authentic racemic material (98.5:1.5 er shown below; chiracel OD column (25 cm x 0.46 cm), 99.9/0.1 hexanes/*i*-PrOH, 1.0 mL/min, 220 nm).

(6) Barbero, A.; Blakemore, D. C.; Fleming, I.; Wesley, R. N. *J. Chem. Soc. Perkin Trans. 1* **1997**, 1329–1352.

(7) Kacprzynski, M. A.; Kazane, S. A.; May, T. L.; Hoveyda, A. H. *Org. Lett.* **2007**, 9, 3187–3190.

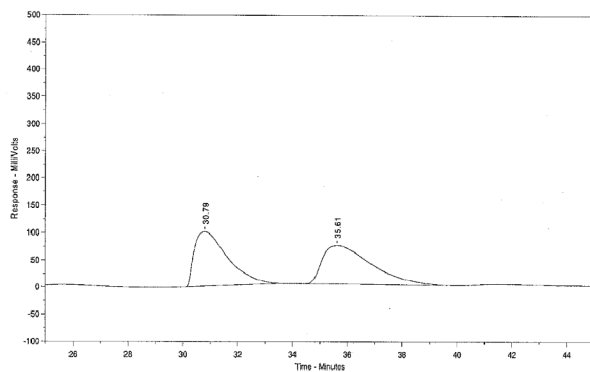

| Peak # | Ret. Time | Name |
|--------|-----------|------|
| 1      | 30.79     |      |
| 2      | 35.61     |      |

| Amount | Amt % | Area    | Area % | Type | Width |
|--------|-------|---------|--------|------|-------|
| 0.00   | N/A   | 8487069 | 48.614 | BB   | 1.33  |
| 0.00   | N/A   | 8970879 | 51.386 | BB   | 1.97  |

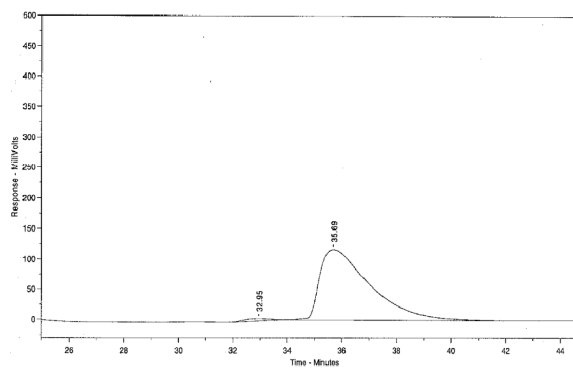

| Peak # | Ret. Time | Name |
|--------|-----------|------|
| 1      | 32.95     |      |
| 2      | 35.69     |      |

| Amount | Amt % | Area     | Area % | Type | Width |
|--------|-------|----------|--------|------|-------|
| 0.00   | N/A   | 240985   | 1.590  | BB   | 1.55  |
| 0.00   | N/A   | 14912540 | 98.410 | BB   | 1.90  |

| Retention time | Area    | Area % | Retention time | Area     | Area % |
|----------------|---------|--------|----------------|----------|--------|
| 30.79          | 8487069 | 48.614 | 32.95          | 240985   | 1.590  |
| 35.61          | 8970879 | 51.386 | 35.69          | 14912540 | 98.410 |

**(R)-4-(Dimethyl(phenyl)silyl)-4-(4-methoxyphenyl)butan-2-one (Table 3, entry 5).**  $^1\text{H}$  NMR (400 MHz,  $\text{CDCl}_3$ ):  $\delta$  7.40-7.30 (5H, m), 6.84 (2H, d,  $J = 8.4$  Hz), 6.73 (2H, d,  $J = 8.4$  Hz), 3.74 (3H, s), 2.87-2.77 (2H, m), 2.59 (1H, dd,  $J = 26.4, 13.2$  Hz), 1.92 (3H, s), 0.22 (3H, s), 0.19 (3H, s). Optical rotation:  $[\alpha]_D^{20} -1.84$  ( $c$  1.30,  $\text{CHCl}_3$ ) for a sample with 97:3 er. The spectroscopic data match those reported previously<sup>6</sup> and the absolute configuration was assigned by analogy to entry 4 in Table 3. Enantiomeric purity was determined by HPLC analysis in comparison with authentic racemic material (97:3 er shown below; chiralcel AD-H column (25 cm x 0.46 cm), 95/5 hexanes/*i*-PrOH, 0.9 mL/min, 220 nm).

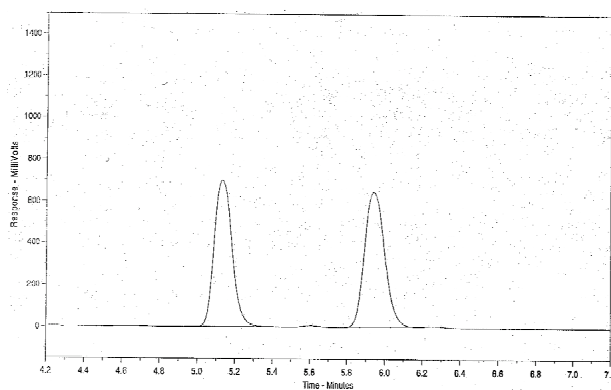

| Peak # | Ret. Time | Name |
|--------|-----------|------|
| 1      | 5.13      |      |
| 2      | 5.94      |      |

| Amount | Amt % | Area    | Area % | Type | Width |
|--------|-------|---------|--------|------|-------|
| 0.00   | N/A   | 4626453 | 49.186 | BB   | 0.10  |
| 0.00   | N/A   | 4779563 | 50.814 | BB   | 0.12  |

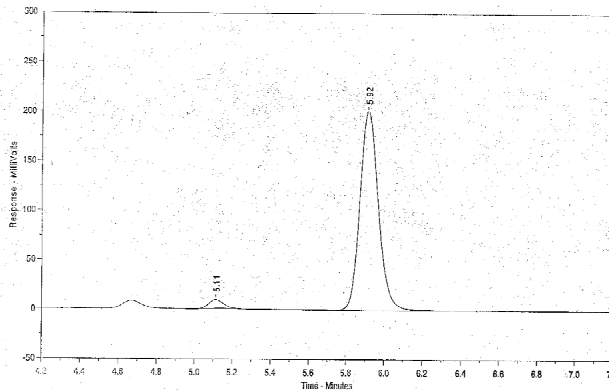

| Peak # | Ret. Time | Name |
|--------|-----------|------|
| 1      | 5.11      |      |
| 2      | 5.92      |      |

| Amount | Amt % | Area    | Area % | Type | Width |
|--------|-------|---------|--------|------|-------|
| 0.00   | N/A   | 46099   | 3.272  | BB   | 0.08  |
| 0.00   | N/A   | 1362808 | 96.728 | BB   | 0.10  |

| Retention time | Area    | Area % | Retention time | Area    | Area % |
|----------------|---------|--------|----------------|---------|--------|
| 5.13           | 4626453 | 49.186 | 5.11           | 46099   | 3.272  |
| 5.94           | 4779563 | 50.814 | 5.92           | 1362808 | 96.728 |

**(R)-4-(Dimethyl(phenyl)silyl)-4-(4-(trifluoromethyl)phenyl)butan-2-one (Table 3, entry 6).**  $^1\text{H}$  NMR (400 MHz,  $\text{CDCl}_3$ ):  $\delta$  7.46-7.36 (7H, m), 7.03 (2H, d,  $J = 8.0$  Hz), 3.02-2.91 (2H, m), 2.71 (1H, d,  $J = 16.0$  Hz), 1.98 (3H, s), 0.26 (3H, s), 0.25 (3H, s); optical rotation:  $[\alpha]_D^{20} +6.66$  ( $c$  2.45,  $\text{CHCl}_3$ ) for a sample with 96:4 er. The spectroscopic data match those reported previously<sup>6</sup> and the absolute configuration was assigned by analogy to entry 4 in Table 3.

Enantiomeric purity was determined by HPLC analysis in comparison with authentic racemic material (96:4 er shown below; chiralpak AD-H column (25 cm x 0.46 cm), 99/1 hexanes/*i*-PrOH, 0.3 mL/min, 220 nm).

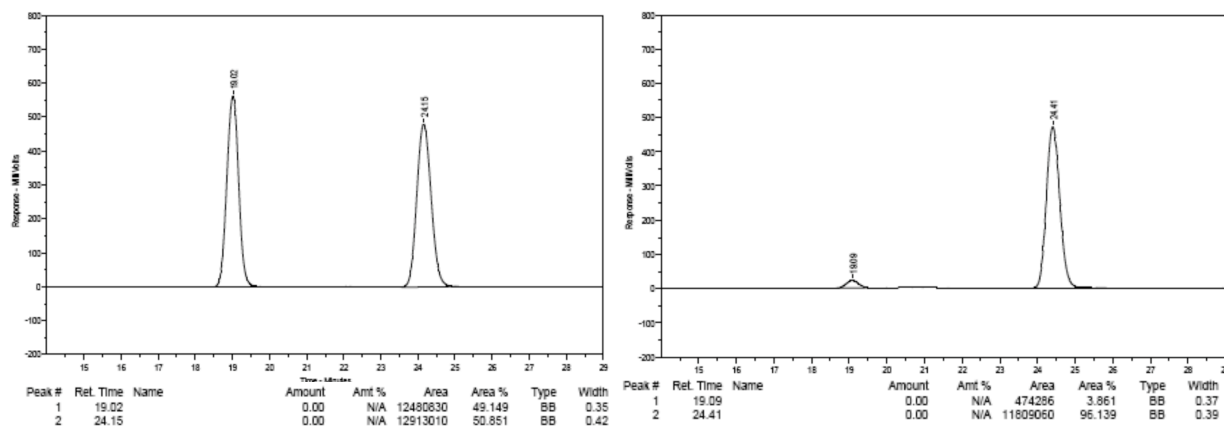

| Retention time | Area     | Area % | Retention time | Area     | Area % |
|----------------|----------|--------|----------------|----------|--------|
| 19.02          | 12480830 | 49.149 | 19.09          | 474286   | 3.861  |
| 24.15          | 12913010 | 50.851 | 24.41          | 11809060 | 96.139 |

**(*R*)-4-(Dimethyl(phenyl)silyl)-4-*o*-tolylbutan-2-one (Table 3, entry 7).** <sup>1</sup>H NMR (400 MHz, CDCl<sub>3</sub>): δ 7.40-7.32 (5H, m), 7.10-7.07 (2H, m), 7.02-6.98 (1H, m), 6.88-6.86 (1H, m), 3.16 (1H, dd, *J* = 11.2, 4.0 Hz), 2.96 (1H, dd, *J* = 16.8, 10.8 Hz), 2.68 (1H, dd, *J* = 16.8, 4.0 Hz), 2.24 (3H, s), 1.93 (3H, s), 0.30 (3H, s), 0.21 (3H, s). Optical rotation: [α]<sub>D</sub><sup>20</sup> +11.3 (*c* 1.08, CHCl<sub>3</sub>) for a sample with 93.5:6.5 er. The spectroscopic data match those reported previously<sup>8</sup> and the absolute configuration was assigned by analogy to entry 4 in Table 3. Enantiomeric purity was determined by HPLC analysis in comparison with authentic racemic material (93.5:6.5 shown below; chiracel OD column (25 cm x 0.46 cm), 99.9/0.1 hexanes/*i*-PrOH, 0.5 mL/min, 220 nm).

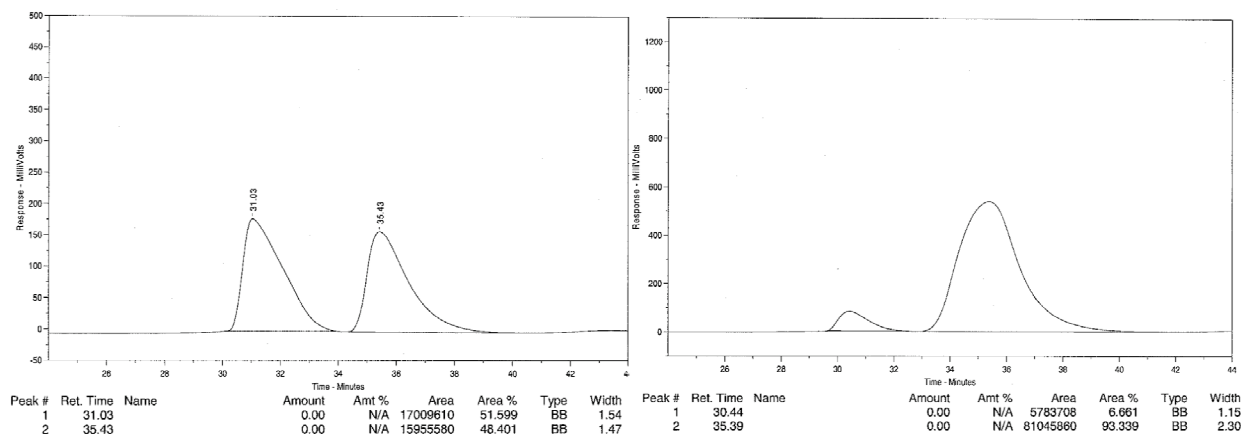

| Retention time | Area     | Area % | Retention time | Area     | Area % |
|----------------|----------|--------|----------------|----------|--------|
| 31.03          | 17009610 | 51.599 | 30.44          | 5783708  | 6.661  |
| 35.43          | 15955580 | 48.401 | 35.39          | 81045860 | 93.339 |

(8) Shintani, R.; Okamoto, K.; Hayashi, T. *Org. Lett.* **2005**, *7*, 4757–4759.

**(S)-3-(Dimethyl(phenyl)silyl)-1-phenylbutan-1-one (13).**  $^1\text{H}$  NMR (400 MHz,  $\text{CDCl}_3$ ):  $\delta$  7.84-7.81 (2H, m), 7.55-7.49 (3H, m), 7.42-7.35 (5H, m), 3.00 (1H, dd,  $J = 16.0, 3.2$  Hz), 2.66 (1H, dd,  $J = 16.0, 11.2$  Hz), 1.66-1.57 (1H, m), 0.98 (3H, d,  $J = 7.2$  Hz), 0.34 (3H, s), 0.33 (3H, s);  $^{13}\text{C}$  NMR (100 MHz,  $\text{CDCl}_3$ ):  $\delta$  200.5, 137.6, 137.1, 134.0, 132.7, 129.1, 128.5, 128.1, 127.8, 40.7, 15.9, 14.6, -4.7, -5.4. Optical rotation:  $[\alpha]_{\text{D}}^{20} +12.4$  ( $c$  1.10,  $\text{CHCl}_3$ ) for a sample with 95.5:4.5 er. The spectroscopic data match those reported previously<sup>9</sup> and the absolute configuration was assigned by comparison with reported data.<sup>10</sup> Enantiomeric purity was determined by HPLC analysis in comparison with authentic racemic material (95.5:4.5 er shown below; chiracel OD column (25 cm x 0.46 cm), 99.9/0.1 hexanes/*i*-PrOH, 1.0 mL/min, 220 nm).

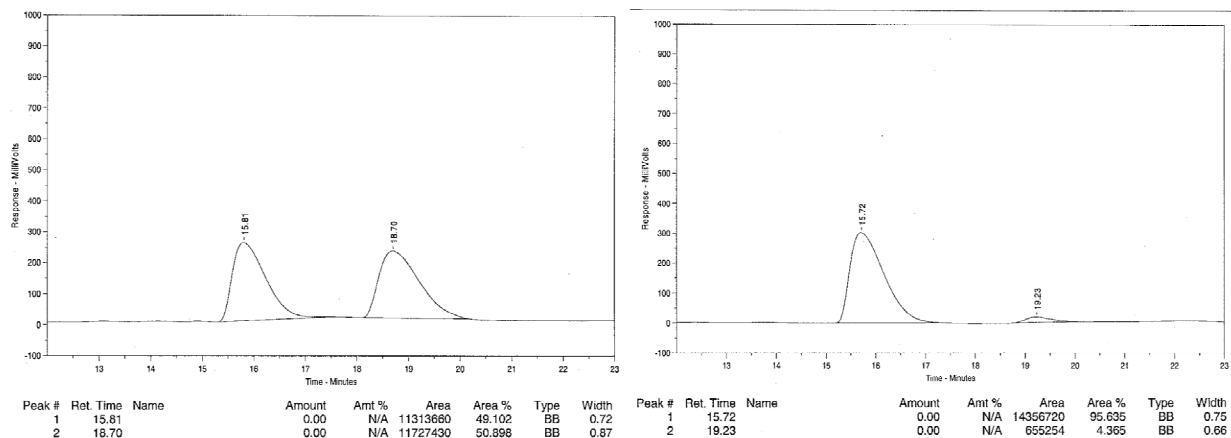

| Retention time | Area     | Area % | Retention time | Area     | Area % |
|----------------|----------|--------|----------------|----------|--------|
| 15.81          | 11313660 | 49.102 | 15.72          | 14356720 | 95.635 |
| 18.70          | 11727430 | 50.898 | 19.23          | 655254   | 4.365  |

**(R)-3-(Dimethyl(phenyl)silyl)-3-phenylpropanenitrile (14).**  $^1\text{H}$  NMR (400 MHz,  $\text{CDCl}_3$ ):  $\delta$  7.43-7.33 (5H, m), 7.27-7.23 (2H, m), 7.19-7.14 (1H, m), 6.96-6.93 (2H, m), 2.65-2.56 (3H, m), 0.27 (6H, s);  $^{13}\text{C}$  NMR (100 MHz,  $\text{CDCl}_3$ ):  $\delta$  140.3, 135.8, 134.7, 130.5, 129.2, 128.7, 128.1, 126.6, 120.3, 33.7, 19.5, -3.4, -4.9. Optical rotation:  $[\alpha]_{\text{D}}^{20} -13.4$  ( $c$  1.16,  $\text{CHCl}_3$ ) for a sample with 90:10 er. The spectroscopic data match those reported previously<sup>5</sup> and the absolute configuration was assigned by analogy to entry 1 in Table 3. Enantiomeric purity was determined by HPLC analysis in comparison with authentic racemic material (90:10 er shown below; chiracel AS column (25 cm x 0.46 cm), 99.7/0.3 hexanes/*i*-PrOH, 1.0 mL/min, 220 nm).

(9) Fleming, I.; Henning, R.; Parker, D. C.; Plaut, H. E.; Sanderson, P. E. J. *J. Chem. Soc., Perkin Trans. 1*, **1995**, 317-337.

(10) Hayashi, T.; Matsumoto, Y.; Ito, Y. *J. Am. Chem. Soc.* **1988**, *110*, 5579-5581.



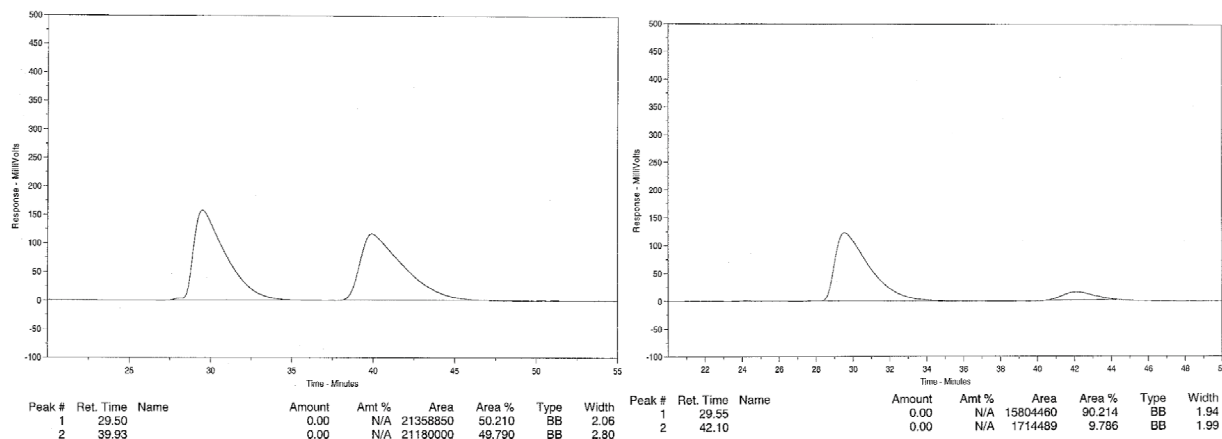

| Retention time | Area     | Area % | Retention time | Area     | Area % |
|----------------|----------|--------|----------------|----------|--------|
| 29.50          | 21358850 | 50.210 | 29.55          | 15804460 | 90.214 |
| 39.93          | 21180000 | 49.790 | 42.10          | 1714489  | 9.786  |

**(S)-Methyl 3-(dimethyl(phenyl)silyl)butanoate (15).**  $^1\text{H}$  NMR (400 MHz,  $\text{CDCl}_3$ ):  $\delta$  7.52-7.49 (2H, m), 7.39-7.33 (3H, m), 3.62 (3H, s), 2.39 (1H, dd,  $J = 15.2, 4.0$  Hz), 2.07 (1H, dd,  $J = 15.2, 11.2$  Hz), 1.49-1.40 (1H, m), 0.98 (3H, d,  $J = 7.2$  Hz), 0.29 (6H, s). Optical rotation:  $[\alpha]_D^{20} +2.50$  ( $c$  1.75,  $\text{CHCl}_3$ ) for a sample with 96.5:3.5 er. The spectroscopic data match those reported previously<sup>11</sup> and the absolute configuration was assigned by analogy to entry 1 in Table 3. Enantiomeric purity was determined by HPLC analysis in comparison with authentic racemic material (96.5:3.5 er shown below; chiralpak AD-H column (25 cm x 0.46 cm), 99.8/0.2 hexanes/*i*-PrOH, 0.51 mL/min, 220 nm).

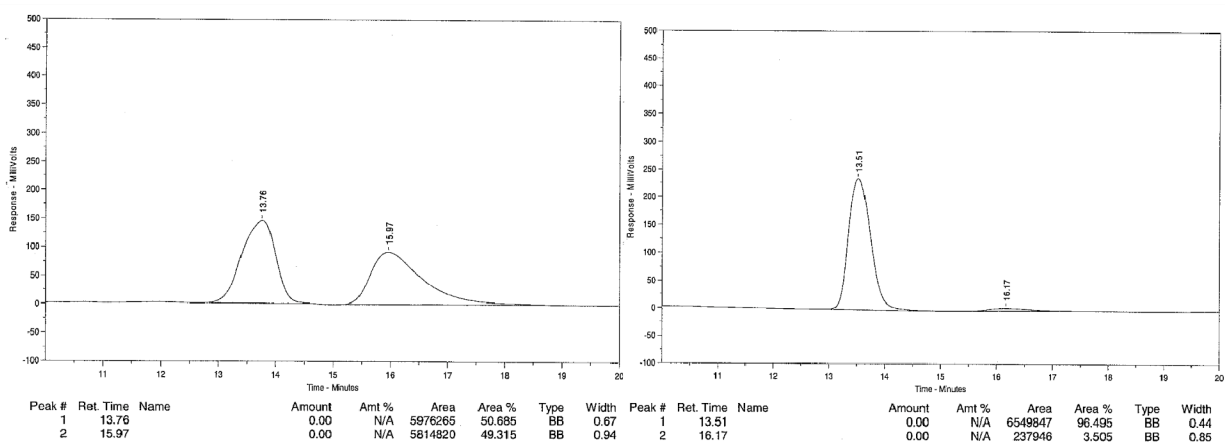

| Retention time | Area    | Area % | Retention time | Area    | Area % |
|----------------|---------|--------|----------------|---------|--------|
| 13.76          | 5976265 | 50.685 | 13.51          | 6549847 | 96.495 |
| 15.97          | 5814820 | 49.315 | 16.17          | 237946  | 3.505  |

**(R)-Methyl 3-(dimethyl(phenyl)silyl)-3-phenylpropanoate (16).**  $^1\text{H}$  NMR (400 MHz,  $\text{CDCl}_3$ ):  $\delta$  7.42-7.32 (5H, m), 7.22-7.19 (2H, m), 7.12-7.08 (1H, m), 6.97-6.95 (2H, m), 3.47 (3H, s), 2.86 (1H, dd,  $J = 11.2, 4.8$  Hz), 2.77 (1H, dd,  $J = 15.6, 11.2$  Hz), 2.66 (1H, dd,  $J = 15.6, 11.2$  Hz), 0.98 (3H, d,  $J = 7.2$  Hz), 0.26 (3H, s), 0.23 (3H, s). Optical rotation:  $[\alpha]_D^{20} +4.98$  ( $c$  2.30,  $\text{CHCl}_3$ )

(11) Lipshutz, B. H.; Tanaka, N.; Taft, B. R.; Lee, C-T. *Org. Lett.* **2006**, 8, 1963–1966.

for a sample with 95.5:4.5 er. The spectroscopic data match those reported previously<sup>12</sup> and the absolute configuration was assigned by analogy to the product entry 4 in Table 3. Enantiomeric purity was determined by HPLC analysis in comparison with authentic racemic material (95.5:4.5 er shown below; chiralpak AD-H column (25 cm x 0.46 cm), 99.2/0.8 hexanes/*i*-PrOH, 0.3 mL/min, 220 nm).

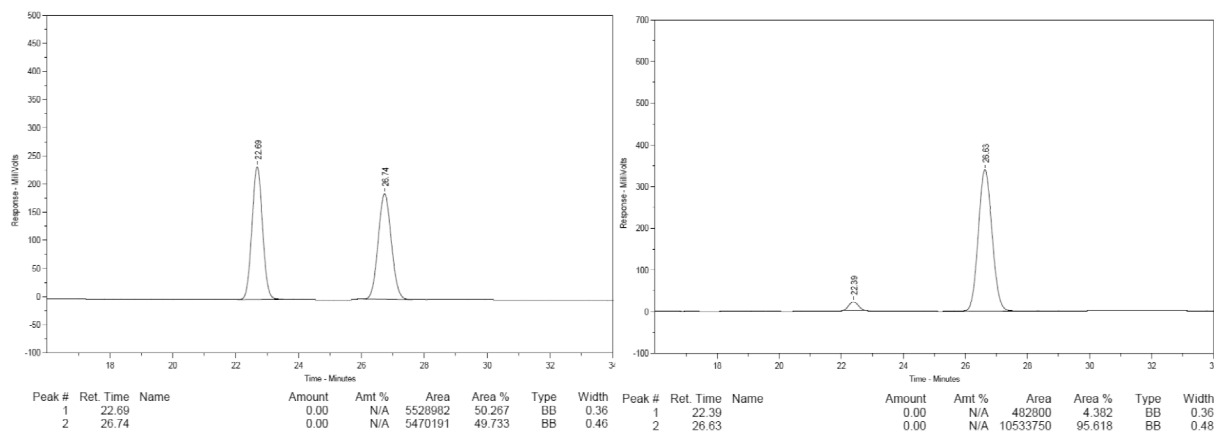

| Retention time | Area    | Area % | Retention time | Area     | Area % |
|----------------|---------|--------|----------------|----------|--------|
| 22.69          | 5528982 | 50.267 | 22.39          | 482800   | 4.382  |
| 26.74          | 5470191 | 49.733 | 26.63          | 10533750 | 95.618 |

### ■ Chiral NHC–Cu-Catalyzed Enantioselective 1,6-Conjugate Silyl Additions

**(*R,Z*)-3-(2-(Dimethyl(phenyl)silyl)-2-phenylethylidene)cyclohexanone (20).** IR (neat): 3023 (m), 2956 (m), 1714 (s), 1248 (m)  $\text{cm}^{-1}$ ;  $^1\text{H}$  NMR (400 MHz,  $\text{CDCl}_3$ ):  $\delta$  7.36–7.26 (5H, m), 7.18 (2H, t,  $J = 8.0$  Hz), 7.07 (1H, t,  $J = 7.4$  Hz), 6.97–6.93 (2H, m), 5.67 (1H, d,  $J = 11.6$  Hz), 3.25 (1H, d,  $J = 11.6$  Hz), 2.94 (1H, d,  $J = 16.4$  Hz), 2.69 (1H, dd,  $J = 16.4, 1.6$  Hz), 2.38–2.26 (4H, m), 1.80–1.65 (2H, m), 0.22 (3H, s), 0.19 (3H, s);  $^{13}\text{C}$  NMR (100 MHz,  $\text{CDCl}_3$ ):  $\delta$  209.3, 142.4, 137.3, 134.9, 132.2, 129.9, 128.9, 128.2, 127.9, 125.4, 124.7, 46.0, 42.0, 38.0, 35.8, 25.6, –3.7, –4.5; HRMS ( $\text{ES}^+$ ) Calcd for  $\text{C}_{22}\text{H}_{26}\text{SiONa}$  [ $\text{M}+\text{Na}$ ]: 357.1651, Found: 357.1645. Optical rotation:  $[\alpha]_{\text{D}}^{20} -5.90$  ( $c$  1.81,  $\text{CHCl}_3$ ) for a sample with 98:2 er. The absolute configuration was assigned by analogy to entry 4 in Table 3. Enantiomeric purity was determined by HPLC analysis in comparison with authentic racemic material (98:2 er shown below; chiralpak AD-H column (25 cm x 0.46 cm), 95/5 hexanes/*i*-PrOH, 0.3 mL/min, 220 nm).

(12) Dambacher, J.; Bergdahl, M. *J. Org. Chem.* **2005**, *70*, 580–589.

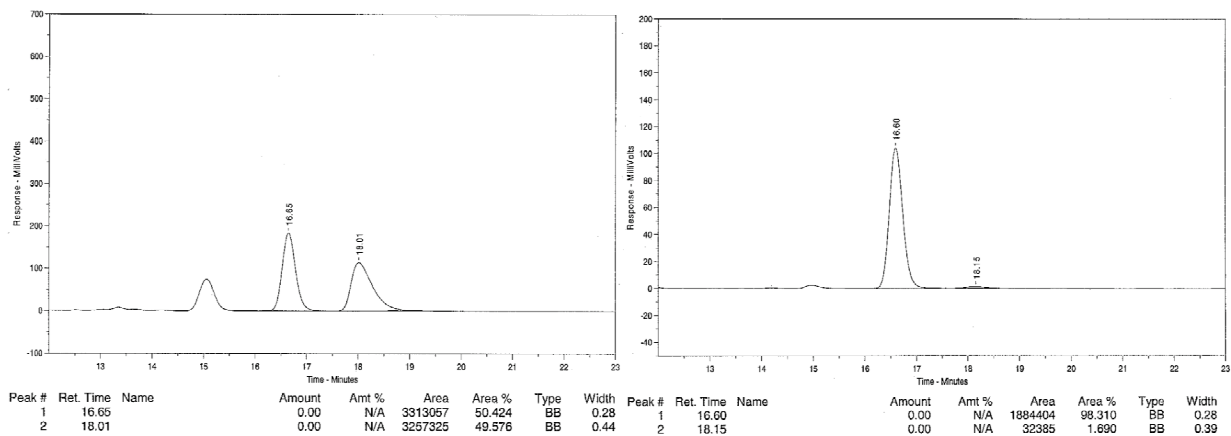

| Retention time | Area    | Area % | Retention time | Area    | Area % |
|----------------|---------|--------|----------------|---------|--------|
| 16.65          | 3313057 | 50.424 | 16.60          | 1884404 | 98.310 |
| 18.01          | 3257325 | 49.576 | 18.15          | 32385   | 1.690  |

**(*R,E*)-3-(2-(Dimethyl(phenyl)silyl)-2-phenylethylidene)-4,4-dimethylcyclohexanone (21).** IR (neat): 2959 (m), 1686 (s), 1253 (s)  $\text{cm}^{-1}$ ;  $^1\text{H}$  NMR (400 MHz,  $\text{CDCl}_3$ ):  $\delta$  7.37-7.27 (5H, m), 7.19 (2H, t,  $J = 7.6$  Hz), 7.08 (1H, t,  $J = 7.4$  Hz), 6.95 (2H, d,  $J = 7.2$  Hz), 5.69 (1H, d,  $J = 11.6$  Hz), 3.16 (1H, d,  $J = 11.6$  Hz), 3.04 (1H, d,  $J = 17.2$  Hz), 2.73 (1H, dd,  $J = 17.2, 1.6$  Hz), 2.33-2.27 (2H, m), 1.59 (2H, t,  $J = 6.8$  Hz) 1.18 (3H, s), 1.15 (3H, s), 0.22 (3H, s), 0.19 (3H, s);  $^{13}\text{C}$  NMR (100 MHz,  $\text{CDCl}_3$ ):  $\delta$  210.5, 142.6, 138.0, 137.3, 134.9, 129.9, 128.9, 128.2, 127.9, 125.4, 122.7, 43.0, 38.2, 38.0, 38.0, 36.7, 28.5, 28.3, -3.7, -4.5; HRMS ( $\text{ES}^+$ ) Calcd for  $\text{C}_{24}\text{H}_{30}\text{SiONa}$  [ $\text{M}+\text{Na}$ ]: 385.1964, Found: 385.1955. Optical rotation:  $[\alpha]_{\text{D}}^{20} +16.0$  ( $c$  1.30,  $\text{CHCl}_3$ ) for a sample with 96:4 er. The absolute configuration was assigned by analogy to entry 4 in Table 3. Enantiomeric purity was determined by HPLC analysis in comparison with authentic racemic material (96:4 er shown below; chiralpak AD-H column (25 cm x 0.46 cm), 99.3/0.7 hexanes/*i*-PrOH, 0.3 mL/min, 220 nm).

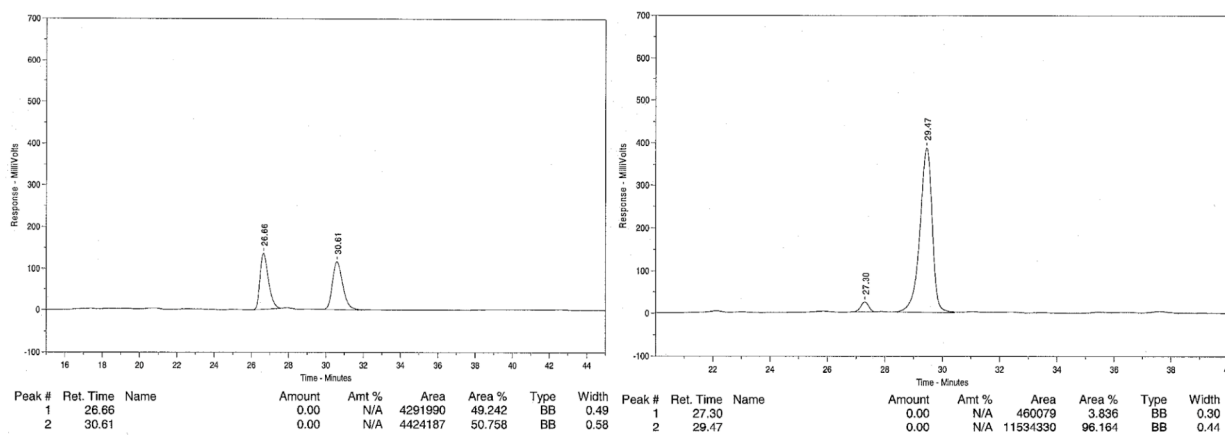

| Retention time | Area    | Area % | Retention time | Area     | Area % |
|----------------|---------|--------|----------------|----------|--------|
| 26.66          | 4291990 | 49.242 | 27.30          | 460079   | 3.836  |
| 30.61          | 4424187 | 50.758 | 29.47          | 11534330 | 96.164 |

**(*R,E*)-3-(Dimethyl(phenyl)silyloxy)-3-styrylcyclohexanone (22).** IR (neat): 2955 (m), 1716 (s), 1427 (m), 1251 (s)  $\text{cm}^{-1}$ ;  $^1\text{H}$  NMR (400 MHz,  $\text{CDCl}_3$ ):  $\delta$  7.52-7.50 (2H, m), 7.37-7.21 (6H, m), 7.18-7.16 (2H, m), 6.37 (1H, d,  $J = 16.4$  Hz), 6.11 (1H, d,  $J = 16.4$  Hz), 2.65 (1H, d,  $J = 14$  Hz), 2.61 (1H, d,  $J = 14$  Hz), 2.91-2.33 (1H, m), 2.90-2.21 (1H, m), 2.11-2.00 (2H, m), 1.91-1.74 (2H, m), 0.35 (3H, s), 0.33 (3H, s);  $^{13}\text{C}$  NMR (100 MHz,  $\text{CDCl}_3$ ):  $\delta$  210.2, 140.2, 136.8, 135.0, 134.1, 130.0, 129.9, 129.3, 128.6, 128.5, 127.2, 78.9, 54.1, 41.4, 38.1, 21.4, 1.6, 1.5; HRMS (ESI<sup>+</sup>) Calcd for  $\text{C}_{22}\text{H}_{27}\text{SiO}_2$  [M+H]: 351.1780, Found: 351.1769. Optical rotation:  $[\alpha]_{\text{D}}^{20} +10.4$  (c 0.90,  $\text{CHCl}_3$ ) for a sample with 94.5:5.5 er. Enantiomeric purity was determined by HPLC analysis in comparison with authentic racemic material (94.5:5.5 er shown below; chiralpak AD-H column (25 cm x 0.46 cm), 99.3/0.7 hexanes/*i*-PrOH, 0.3 mL/min, 220 nm).

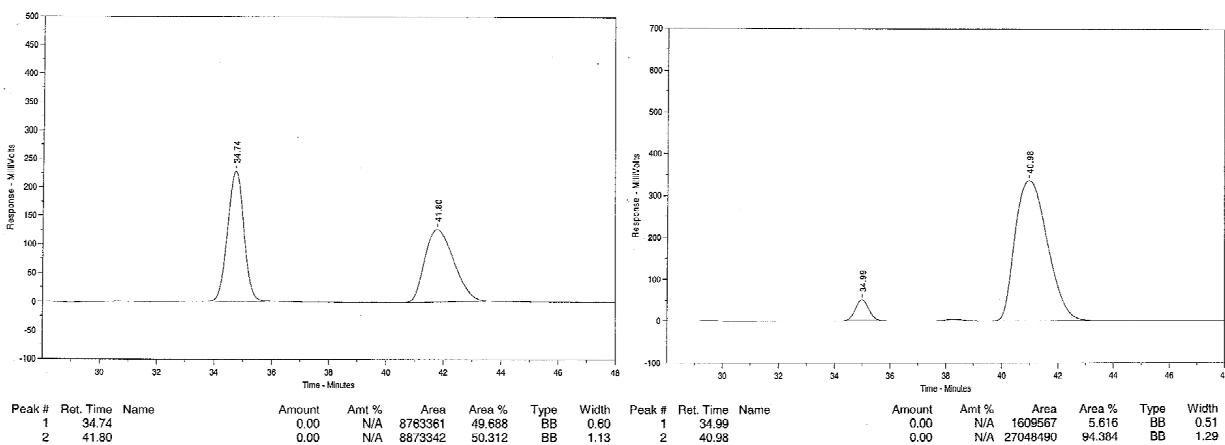

| Retention time | Area    | Area % | Retention time | Area     | Area % |
|----------------|---------|--------|----------------|----------|--------|
| 34.74          | 8763361 | 49.688 | 34.99          | 1609567  | 5.616  |
| 41.80          | 8873342 | 50.312 | 40.98          | 27048490 | 94.384 |

**(2*S*,3*S*)-3-(Dimethyl(phenyl)silyl)-2-(hydroxy(phenyl)methyl)cyclopentanone (23).** IR (neat): 3434 (w), 2955 (w), 2893 (w), 1724 (s), 1250 (s)  $\text{cm}^{-1}$ ;  $^1\text{H}$  NMR (400 MHz,  $\text{CDCl}_3$ ):  $\delta$  7.45-7.42 (2H, m), 7.40-7.32 (3H, m), 7.29-7.19 (3H, m), 7.06-7.03 (2H, m), 4.83 (1H, d,  $J = 4.4$  Hz), 3.86 (1H, bs), 2.53 (1H, dd,  $J = 9.6, 4.4$  Hz), 2.15-2.06 (1H, m), 1.95-1.86 (2H, m), 1.66-1.57 (1H, m), 1.50-1.37 (1H, m), 0.22 (3H, s), 0.20 (3H, s);  $^{13}\text{C}$  NMR (100 MHz,  $\text{CDCl}_3$ ):  $\delta$  225.2, 142.3, 137.6, 134.5, 130.1, 129.0, 128.7, 128.3, 127.3, 75.8, 56.2, 40.9, 24.4, 23.9, -4.0, -4.2; HRMS (ESI<sup>+</sup>) Calcd for  $\text{C}_{20}\text{H}_{25}\text{SiO}_2$  [M+H]: 325.1624, Found: 325.1635. Optical rotation:  $[\alpha]_{\text{D}}^{20} -15.1$  (c 1.40,  $\text{CHCl}_3$ ) for a sample with 6:1 dr.

**(2*S*,3*S*)-3-(Dimethyl(phenyl)silyl)-2-(hydroxy(phenyl)methyl)cycloheptanone (24).** Upon standing, the product undergoes retro-aldol reaction, as evidenced by HRMS and  $^1\text{H}$  NMR to afford (*S*)-3-(dimethyl(phenyl)silyl)cycloheptanone (entry 3 in Table 2) in 95.5:4.5 er. HRMS of **24** (ESI<sup>+</sup>) Calcd for  $\text{C}_{22}\text{H}_{32}\text{NSiO}_2$  [M+NH<sub>4</sub>]: 370.2202, Found: 370.2204. The diastereomeric ratio (3:1 dr) was obtained through analysis of  $^1\text{H}$  NMR spectra of the unpurified mixtures.

■ **Preparation of (1*R*,4*R*)-4-(dimethyl(phenyl)silyl)-3,3-dimethyl-1-phenylcyclopentanol (26):** An oven-dried vial (6 x 1 cm) under a dry  $\text{N}_2$  atmosphere equipped with a stir bar was charged with **25** (Table 2, entry 1, 99:1 er) (0.12 mmol, 30 mg) and  $\text{Et}_2\text{O}$  (2 mL) was added and

the solution was allowed to cool to  $-78\text{ }^{\circ}\text{C}$ . A solution of PhLi ( $78\ \mu\text{L}$ ,  $0.13\ \text{mmol}$ ) in  $n\text{-Bu}_2\text{O}$  ( $1.71\ \text{M}$ ) was added at  $-78\text{ }^{\circ}\text{C}$ . After  $6\ \text{h}$  at  $-50\text{ }^{\circ}\text{C}$ , the reaction was quenched by the addition of  $1\ \text{M HCl}$  solution ( $0.5\ \text{mL}$ ) and  $\text{H}_2\text{O}$  ( $2\ \text{mL}$ ) and the mixture was allowed to warm to  $22\text{ }^{\circ}\text{C}$ . Layers were separated, and the aqueous layer was washed with  $\text{Et}_2\text{O}$  ( $5\ \text{mL} \times 2$ ). The combined organic layers were dried over  $\text{MgSO}_4$  and filtered. The volatiles were removed *in vacuo* and the resulting light yellow oil was purified by silica gel chromatography (hexanes/ $\text{Et}_2\text{O}$ :3/1) to afford  $31\ \text{mg}$  ( $0.097\ \text{mmol}$ ,  $85\%$  yield) of **26** as a colorless oil ( $>25:1\ \text{dr}$ ). IR (neat):  $3387\ (\text{w})$ ,  $2953\ (\text{s})$ ,  $2687\ (\text{m})$ ,  $1250\ (\text{s})\ \text{cm}^{-1}$ ;  $^1\text{H NMR}$  ( $400\ \text{MHz}$ ,  $\text{CDCl}_3$ ):  $\delta\ 7.53\text{--}7.50\ (2\text{H}, \text{m})$ ,  $7.44\text{--}7.41\ (2\text{H}, \text{m})$ ,  $7.35\text{--}7.28\ (5\text{H}, \text{m})$ ,  $7.21\text{--}7.18\ (1\text{H}, \text{m})$ ,  $2.42\ (1\text{H}, \text{dd}, J = 13.8, 8.6\ \text{Hz})$ ,  $2.29\ (1\text{H}, \text{dd}, J = 13.6, 13.6\ \text{Hz})$ ,  $2.08\ (1\text{H}, \text{d}, J = 13.6\ \text{Hz})$ ,  $1.87\ (1\text{H}, \text{d}, J = 14.0\ \text{Hz})$ ,  $1.71\ (1\text{H}, \text{s})$ ,  $1.42\text{--}1.37\ (1\text{H}, \text{m})$ ,  $1.23\ (3\text{H}, \text{s})$ ,  $0.97\ (3\text{H}, \text{s})$ ,  $0.39\ (3\text{H}, \text{s})$ ,  $0.35\ (3\text{H}, \text{s})$ ;  $^{13}\text{C NMR}$  ( $100\ \text{MHz}$ ,  $\text{CDCl}_3$ ):  $\delta\ 150.6$ ,  $140.1$ ,  $134.5$ ,  $129.5$ ,  $128.9$ ,  $128.4$ ,  $127.2$ ,  $125.1$ ,  $83.7$ ,  $62.8$ ,  $47.7$ ,  $44.3$ ,  $41.4$ ,  $31.6$ ,  $27.4$ ,  $-1.7$ ,  $-1.9$ ; HRMS ( $\text{ES}^+$ ) Calcd for  $\text{C}_{21}\text{H}_{28}\text{SiONa}\ [\text{M}+\text{Na}]$ :  $347.1807$ , Found:  $347.1811$ . Optical rotation:  $[\alpha]_{\text{D}}^{20}\ -21.0\ (c\ 1.01, \text{CHCl}_3)$ .

**(1R,3R)-4,4-Dimethyl-1-phenylcyclopentane-1,3-diol (27)**. IR (neat):  $3356\ (\text{m})$ ,  $2957\ (\text{s})$ ,  $2926\ (\text{s})$ ,  $2869\ (\text{m})$ ,  $1448\ (\text{s})\ \text{cm}^{-1}$ ;  $^1\text{H NMR}$  ( $400\ \text{MHz}$ ,  $\text{CDCl}_3$ ):  $\delta\ 7.46\text{--}7.43\ (2\text{H}, \text{m})$ ,  $7.38\text{--}7.34\ (2\text{H}, \text{m})$ ,  $7.31\text{--}7.26\ (1\text{H}, \text{m})$ ,  $4.13\ (1\text{H}, \text{dd}, J = 8.0, 6.0\ \text{Hz})$ ,  $2.77\ (1\text{H}, \text{dd}, J = 14.0, 6.0\ \text{Hz})$ ,  $2.22\ (1\text{H}, \text{dd}, J = 14.0, 6.0\ \text{Hz})$ ,  $2.08\ (2\text{H}, \text{s})$ ,  $1.16\ (3\text{H}, \text{s})$ ,  $0.96\ (3\text{H}, \text{s})$ ;  $^{13}\text{C NMR}$  ( $100\ \text{MHz}$ ,  $\text{CDCl}_3$ ):  $\delta\ 143.8$ ,  $129.3$ ,  $128.4$ ,  $126.8$ ,  $92.6$ ,  $80.3$ ,  $50.5$ ,  $42.6$ ,  $42.0$ ,  $28.6$ ,  $23.6$ ; Optical rotation:  $[\alpha]_{\text{D}}^{20}\ -7.04\ (c\ 0.800, \text{CHCl}_3)$  for a sample with  $98:2\ \text{er}$ . Enantiomeric purity was determined by HPLC analysis in comparison with authentic racemic material ( $98:2\ \text{er}$  shown below; chiralpak AD-H column ( $25\ \text{cm} \times 0.46\ \text{cm}$ ),  $90/10\ \text{hexanes}/i\text{-PrOH}$ ,  $0.5\ \text{mL}/\text{min}$ ,  $220\ \text{nm}$ ).

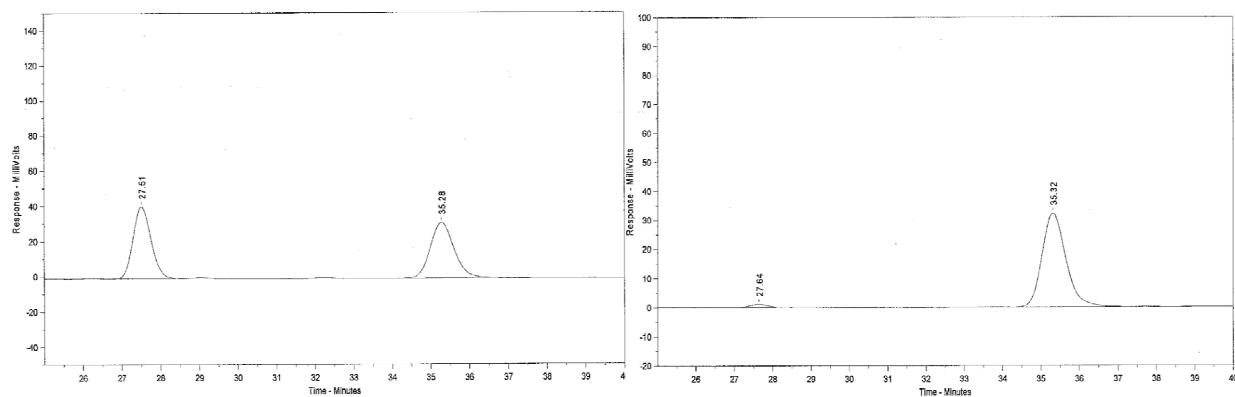

| Retention time | Area    | Area % | Retention time | Area    | Area % |
|----------------|---------|--------|----------------|---------|--------|
| 27.51          | 1313976 | 49.602 | 27.64          | 27467   | 1.949  |
| 35.28          | 1335036 | 50.398 | 35.32          | 1381897 | 98.051 |

**Methyl 2-((1*S*,2*S*)-2-(dimethyl(phenyl)silyl)-6-oxocyclohexyl)acetate (**28**)**<sup>13</sup>. IR (neat): 2951 (w), 2858 (w), 1735 (s), 1708 (s), 1428 (m) cm<sup>-1</sup>; <sup>1</sup>H NMR (400 MHz, CDCl<sub>3</sub>): δ 7.49-7.45 (2H, m), 7.40-7.33 (3H, m), 3.58 (3H, s), 2.78 (1H, dddd, *J* = 18.8, 9.6, 3.6, 0.8 Hz), 2.46-2.32 (3H, m), 2.72-2.13 (2H, m), 1.87-1.82 (1H, m), 1.82-1.56 (2H, m), 1.35 (1H, td, *J* = 12.8, 3.6 Hz), 0.38 (3H, s), 0.33 (3H, s); <sup>13</sup>C NMR (100 MHz, CDCl<sub>3</sub>): δ 212.9, 173.5, 138.5, 134.3, 130.0, 128.7, 52.2, 48.9, 42.5, 34.6, 32.7, 30.8, 28.2, -2.2, -3.3; HRMS (ES<sup>+</sup>) Calcd for C<sub>17</sub>H<sub>25</sub>SiO<sub>3</sub> [M+H]: 305.1573, Found: 305.1580. Optical rotation: [α]<sub>D</sub><sup>20</sup> -79.4 (*c* 2.33, CHCl<sub>3</sub>) for a sample with 97.5:2.5 er. Enantiomeric purity was determined by HPLC analysis in comparison with authentic racemic material (97.5:2.5 er shown below; chiralcel AS column (25 cm x 0.46 cm), 90/10 hexanes/*i*-PrOH, 0.5 mL/min, 220 nm).

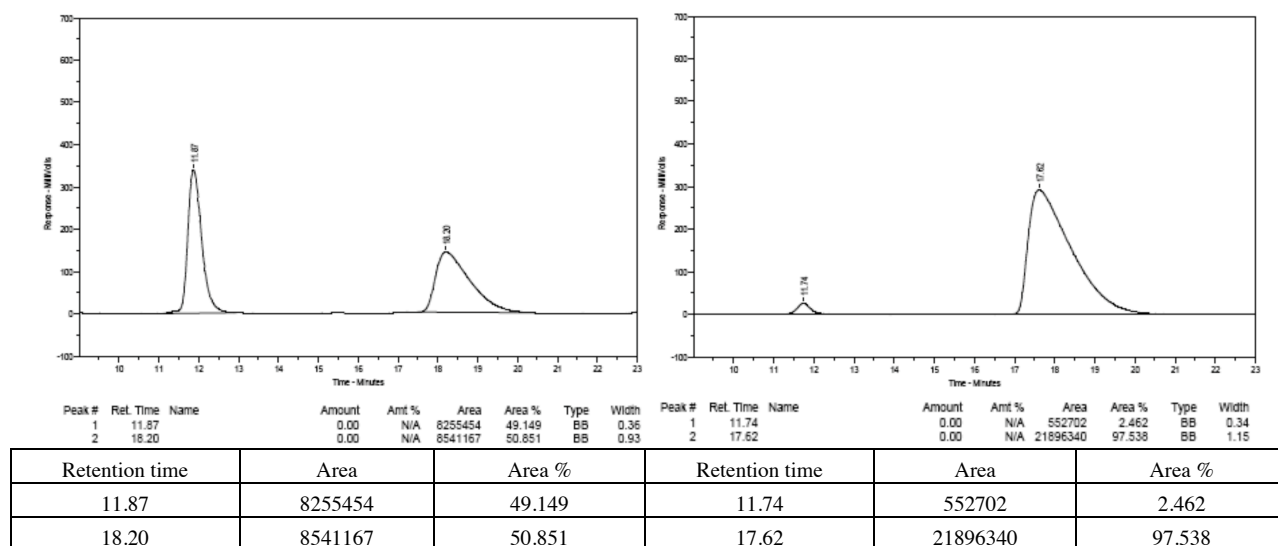

(13) For total synthesis of (+)-erysotramidine, see: (a) Tietze, L. F.; Tolle, N.; Kratzert, D.; Stalke, D. *Org. Lett.* **2009**, *11*, 5230–5233. (b) Blake, A. J.; Gill, C.; Greenhalgh, D. A.; Simpkins, N. S.; Zhang, F. *Synthesis* **2005**, *19*, 3287–3292.

## ■ Screening of ligands.

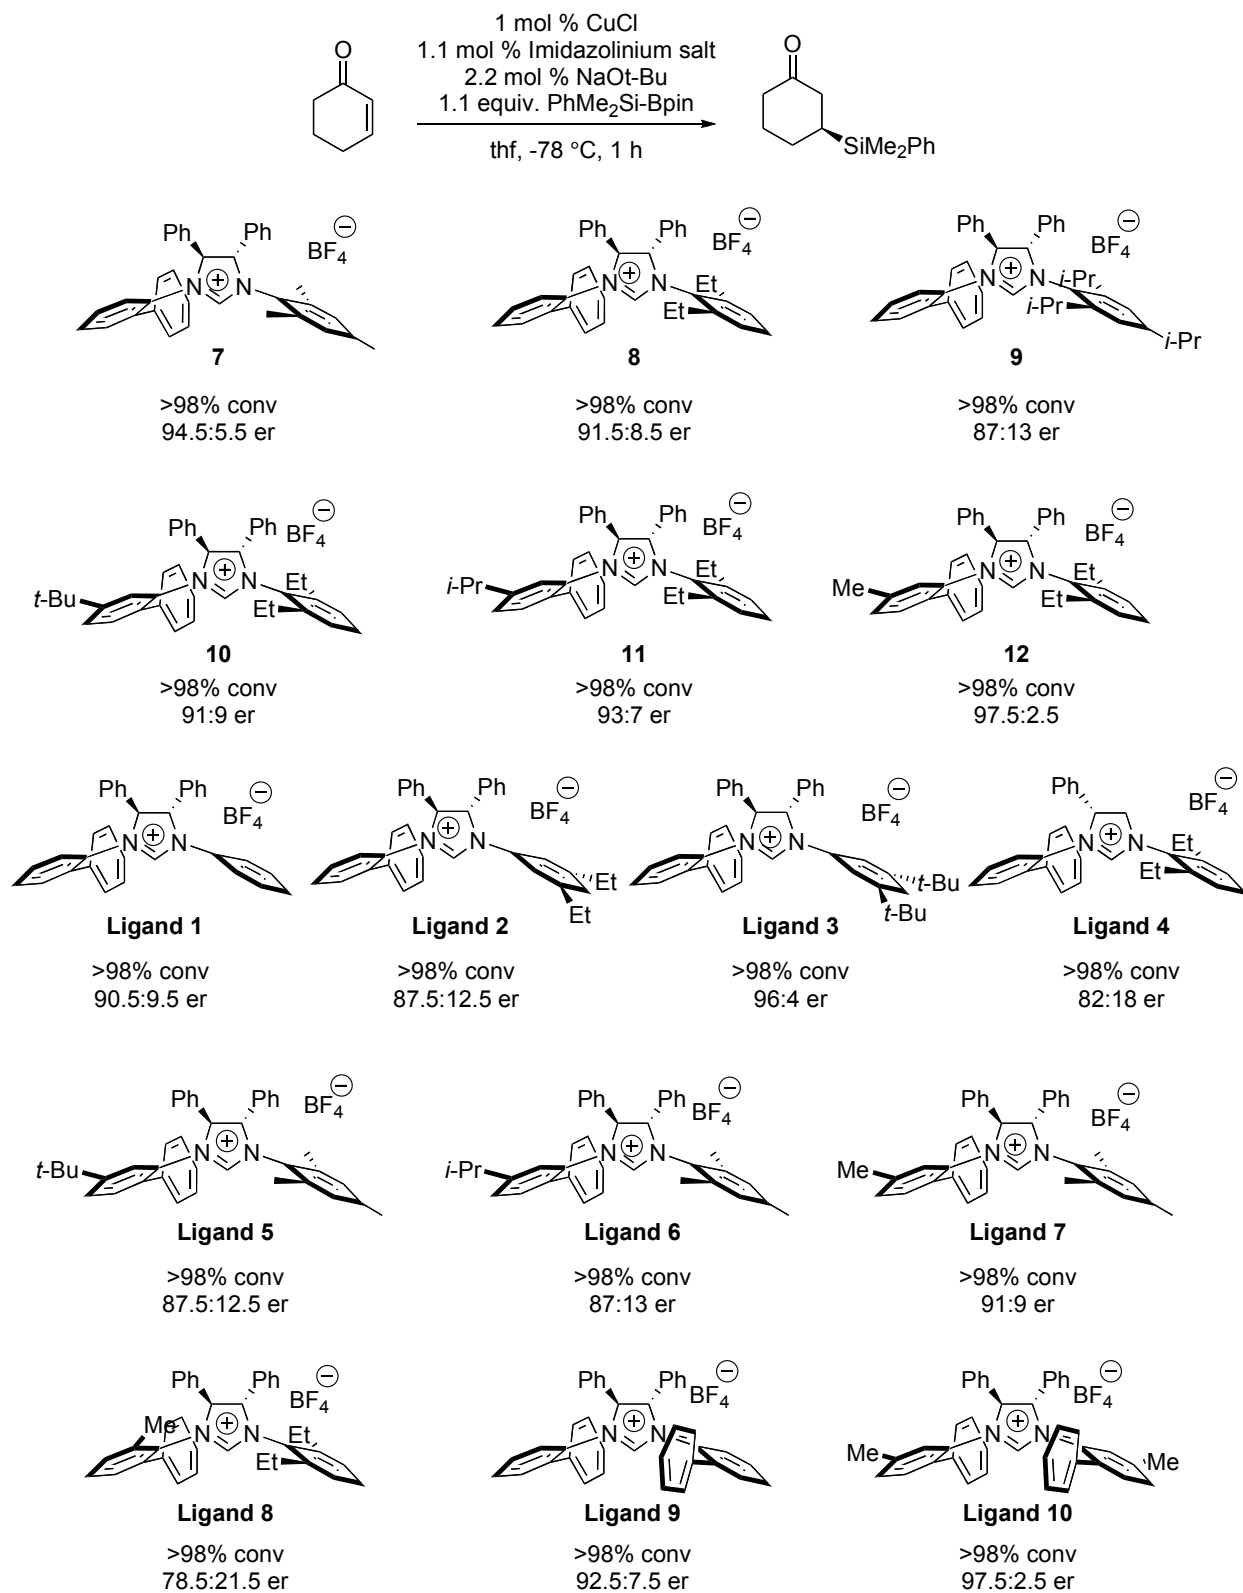

Supplement: NIHMS178777-supplement-2_si_002.pdf [file NIHMS178777-supplement-2_si_002.pdf]
